# Supplementary material for: Genome-wide association study reveals 18 QTL for major agronomic traits in a Nordic–Baltic spring wheat germplasm
Source: Front Plant Sci. 2024 Jun 21;15:1393170. doi: 10.3389/fpls.2024.1393170 (PMC11224466; doi:10.3389/fpls.2024.1393170)
Supplement: Supplementary file 2 [file Table_1.xlsx]

## Sheet: Table S1. The NOBALwheat spring
Table S1. The NOBALwheat spring wheat accession panel.
GenotypeID	Name	Assignment to cluster	Provider	Country of origin (ISO 3166-1 alpha-2 two-letter)	Year of release	Year of hybridisation	State
NW001	Tjalve	N	NMBU	SE	1987	NA	Cultivar
NW002	Avle	N	NMBU	SE	1996	NA	Cultivar
NW003	Bjarne	N	NMBU	NO	2002	NA	Cultivar
NW004	Zebra	N	NMBU	SE	2001	NA	Cultivar
NW005	Bastian	N	NMBU	NO	1989	NA	Cultivar
NW006	T9040	N	NMBU	NO	NA	NA	Breeding line
NW007	T9040 (1995)	S	NMBU	NO	NA	NA	Breeding line
NW008	NK93602 (1995)	N	NMBU	NO	NA	NA	Breeding line
NW009	Paros	S	NMBU	DE	NA	NA	Cultivar
NW010	Paros/NK93602	N	NMBU	NO	NA	NA	Breeding line
NW011	Paros/T9040	N	NMBU	NO	NA	NA	Breeding line
NW012	T9040/Paros	N	NMBU	NO	NA	NA	Breeding line
NW013	Saar	S	NMBU	MX (CIMMYT)	NA	NA	Breeding line
NW014	Dulus	S	NMBU	MX (CIMMYT)	NA	NA	Breeding line
NW015	T10014	N	NMBU	NO	NA	NA	Breeding line
NW016	NK93604	N	NMBU	NO	NA	NA	Breeding line
NW017	T2038	N	NMBU	NO	NA	NA	Breeding line
NW018	MS 273-150	N	NMBU	NO	1982	NA	Breeding line
NW019	Avocet YrA	S	NMBU	AU	NA	NA	Cultivar
NW020	SHA3/CBRD	S	NMBU	MX (CIMMYT)	NA	NA	Breeding line
NW021	MILAN/SHA7	S	NMBU	MX (CIMMYT)	NA	NA	Breeding line
NW022	Naxos (x3)	S	NMBU	DE	1992	NA	Cultivar
NW023	Breeding_Line_023	N	Graminor	NO	NA	NA	Breeding line
NW024	Breeding_Line_024	N	Graminor	NO	NA	NA	Breeding line
NW025	Demonstrant	N	Graminor	NO	2008	NA	Cultivar
NW026	Krabat	N	Graminor	NO	2010	NA	Cultivar
NW027	Breeding_Line_027	N	Graminor	NO	NA	NA	Breeding line
NW028	Laban	N	Graminor	NO	2011	NA	Cultivar
NW029	Amulett	N	NMBU	SE	2013	NA	Cultivar
NW030	Bombona	N	NMBU	SE	2005	NA	Cultivar
NW031	QUARNA	S	NMBU	CH	2005	NA	Cultivar
NW032	Breeding_Line_032	N	Graminor	NO	NA	NA	Breeding line
NW033	Runar	N	NMBU	NO	1972	NA	Cultivar
NW034	Brakar	N	NMBU	NO	1996	NA	Cultivar
NW035	Berserk	N	Graminor	NO	2007	NA	Cultivar
NW037	Sport	N	NMBU	CA	2004	NA	Cultivar
NW038	Vinjett	N	NMBU	SE	1998	NA	Cultivar
NW039	DH20070	S	NMBU	NO	NA	NA	Breeding line
NW040	DH20097	S	NMBU	NO	NA	NA	Breeding line
NW041	ONPMSYDER-05	S	NMBU	MX (CIMMYT)	NA	NA	Breeding line
NW042	Breeding_Line_042	N	Graminor	NO	NA	NA	Breeding line
NW043	Møystad	N	NMBU	NO	2010	NA	Cultivar
NW044	Rollo	N	NMBU	NO	1963	NA	Cultivar
NW045	Sumai #3	N	NMBU	CN	1970	NA	Cultivar
NW046	Mirakel	N	Graminor	NO	2012	NA	Cultivar
NW047	Rabagast	N	Graminor	NO	2013	NA	Cultivar
NW048	Seniorita	N	Graminor	NO	2014	NA	Cultivar
NW049	Breeding_Line_049	N	Graminor	NO	NA	NA	Breeding line
NW050	Willy	N	Graminor	NO	2016	NA	Cultivar
NW051	Berlock	N	NMBU	SE	2014	NA	Cultivar
NW052	Arabella	N	NMBU	PL	2011	NA	Cultivar
NW053	Polkka	N	NMBU	SE	1992	NA	Cultivar
NW054	TUI/RL4137	S	NMBU	MX (CIMMYT)	NA	NA	NA
NW055	T7347	N	NMBU	NO	NA	NA	Breeding line
NW056	Reno	N	NMBU	NO	1975	NA	Cultivar
NW057	Mandaryna	N	NMBU	PL	2014	NA	Cultivar
NW058	Zombi	N	Graminor	NO	2018	NA	Cultivar
NW059	Alarm	N	Graminor	NO	2019	NA	Cultivar
NW060	Breeding_Line_060	N	Graminor	NO	NA	NA	Breeding line
NW061	Gondol	N	Graminor	NO	2022	NA	Cultivar
NW062	Breeding_Line_062	N	Graminor	NO	NA	NA	Breeding line
NW063	Caress	N	NMBU	SE	2017	NA	Cultivar
NW064	Betong	N	Graminor	NO	2019	NA	Cultivar
NW065	GN12760	N	Graminor	NO	NA	NA	Breeding line
NW066	N894037	S	NMBU	CN	NA	NA	Breeding line
NW067	GAMENYA	S	NMBU	ZA	1958	NA	Cultivar
NW068	Azurite	S	ETKI	GB	2006	NA	Cultivar
NW069	Buddy	S	ETKI	DE	2015	NA	Cultivar
NW070	Calixo	S	ETKI	DE	2015	NA	Cultivar
NW071	Cornetto	S	ETKI	DE	2013	NA	Cultivar
NW072	Daugana	N	ETKI	DE	2015	NA	Cultivar
NW073	Disket	N	ETKI	SE	2009	NA	Cultivar
NW074	Granny	S	ETKI	DE	2004	NA	Cultivar
NW075	Hamlet	S	ETKI	DE	2009	NA	Cultivar
NW076	Happy	S	ETKI	SE	2015	NA	Cultivar
NW077	Harenda	S	ETKI	PL	2014	NA	Cultivar
NW078	Helle	N	ETKI	EE	1999	NA	Cultivar
NW079	Hiie	S	ETKI	EE	2016	NA	Cultivar
NW080	Kruunu	S	ETKI	FI	2001	NA	Cultivar
NW081	KWS Buran	S	ETKI	DE	2012	NA	Cultivar
NW082	KWS Collada	S	ETKI	DE	2010	NA	Cultivar
NW083	KWS Scirocco	S	ETKI	DE	2008	NA	Cultivar
NW084	KWS Solanus	S	ETKI	DE	2015	NA	Cultivar
NW085	Leidi	S	ETKI	FI	2016	NA	Cultivar
NW086	Licamero	S	ETKI	DE	2014	NA	Cultivar
NW087	Mahti	S	ETKI	FI	1995	NA	Cultivar
NW088	Manu	N	ETKI	FI	1992	NA	Cultivar
NW089	Meri	N	ETKI	EE	1999	NA	Cultivar
NW090	Mooni	N	ETKI	EE	2007	NA	Cultivar
NW091	Quintus	S	ETKI	DE	2013	NA	Cultivar
NW092	Satu	N	ETKI	SE	1989	NA	Cultivar
NW093	Servus	S	ETKI	DE	2016	NA	Cultivar
NW094	Sorbas	S	ETKI	DE	2013	NA	Cultivar
NW095	Specifik	S	ETKI	FR	2010	NA	Cultivar
NW096	SW Estrad	S	ETKI	SE	2002	NA	Cultivar
NW097	Tybalt	S	ETKI	DE	2004	NA	Cultivar
NW098	Trappe	S	ETKI	DE	2006	NA	Cultivar
NW099	Triathlon	S	ETKI	DE	2016	NA	Cultivar
NW100	Triso	N	ETKI	DE	2000	NA	Cultivar
NW101	Uffo	S	ETKI	LV	2008	NA	Cultivar
NW102	Wanamo	N	ETKI	FI	2009	NA	Cultivar
NW103	Wellamo	N	ETKI	FI	2009	NA	Cultivar
NW104	Wicki	S	ETKI	DE	2014	NA	Cultivar
NW105	Voore	N	ETKI	EE	2015	NA	Cultivar
NW106	762-2	N	ETKI	EE	Main trial 2015-2017	2002	Breeding line
NW107	764	N	ETKI	EE	Main trial 2015-2017	2002	Breeding line
NW108	774	N	ETKI	EE	Main trial 2015-2017	2002	Breeding line
NW109	785	N	ETKI	EE	Main trial 2015-2017	2002	Breeding line
NW110	786	N	ETKI	EE	Main trial 2015-2017	2002	Breeding line
NW111	795	S	ETKI	EE	Main trial 2015-2017	2002	Breeding line
NW112	800	N	ETKI	EE	Main trial 2015-2017	2002	Breeding line
NW113	806	N	ETKI	EE	Main trial 2015-2017	2002	Breeding line
NW114	808	N	ETKI	EE	Main trial 2015-2017	2002	Breeding line
NW115	812	S	ETKI	EE	Main trial 2015-2017	2002	Breeding line
NW116	834	N	ETKI	EE	Main trial 2015-2017	2002	Breeding line
NW117	836	N	ETKI	EE	Main trial 2015-2017	2002	Breeding line
NW118	861	N	ETKI	EE	Main trial 2015-2017	2003	Breeding line
NW119	865	N	ETKI	EE	Main trial 2015-2017	2003	Breeding line
NW120	870	N	ETKI	EE	Main trial 2015-2017	2003	Breeding line
NW121	876	N	ETKI	EE	Main trial 2015-2017	2003	Breeding line
NW122	884	N	ETKI	EE	Main trial 2015-2017	2003	Breeding line
NW123	925-2	N	ETKI	EE	Main trial 2015-2017	2003	Breeding line
NW124	932	N	ETKI	EE	Main trial 2015-2017	2003	Breeding line
NW125	937-1	N	ETKI	EE	Main trial 2015-2017	2004	Breeding line
NW126	938-1	N	ETKI	EE	Main trial 2015-2017	2004	Breeding line
NW127	939-1	N	ETKI	EE	Main trial 2015-2017	2004	Breeding line
NW128	940-1	N	ETKI	EE	Main trial 2015-2017	2004	Breeding line
NW129	941-1	N	ETKI	EE	Main trial 2015-2017	2004	Breeding line
NW130	942	N	ETKI	EE	Main trial 2015-2017	2004	Breeding line
NW131	944-2	S	ETKI	EE	Main trial 2015-2017	2004	Breeding line
NW132	958-1	N	ETKI	EE	Main trial 2015-2017	2004	Breeding line
NW133	969-2	N	ETKI	EE	Main trial 2015-2017	2004	Breeding line
NW134	990-2	N	ETKI	EE	Main trial 2015-2017	2004	Breeding line
NW135	993-1	N	ETKI	EE	Main trial 2015-2017	2004	Breeding line
NW136	995-1	N	ETKI	EE	Main trial 2015-2017	2004	Breeding line
NW137	ROBIJS	S	AREI	LV	2011	NA	Cultivar
NW138	Altare	S	AREI	CH	2010	NA	Cultivar
NW139	Amaretto	S	AREI	DE	2002	NA	Cultivar
NW140	Eminent	S	AREI	DE	2003	NA	Cultivar
NW141	Fasan	N	AREI	DE	1997	NA	Cultivar
NW142	Granary	S	AREI	DE	2007	NA	Cultivar
NW143	Jasna	S	AREI	PL	1996	NA	Cultivar
NW144	Nawra	S	AREI	PL	1999	NA	Cultivar
NW145	Seance	S	AREI	CZ	2008	NA	Cultivar
NW146	Sonett	N	AREI	NL	2010	NA	Cultivar
NW147	Taifun	S	AREI	DE	2000	NA	Cultivar
NW148	Irsijevskaja	S	AREI	BY	1998	NA	Cultivar
NW149	Nandu	S	AREI	DE	1988	NA	Cultivar
NW150	Parabola	S	AREI	BY	2006	NA	Cultivar
NW151	Radunia	S	AREI	BY	2006	NA	Cultivar
NW152	Epos	S	AREI	DE	2004	NA	Cultivar
NW153	01-27-700-05	N	AREI	LV	2005	NA	Breeding line
NW154	F-013-032	S	AREI	LV	2013	NA	Breeding line
NW155	012-024	S	AREI	LV	2012	NA	Breeding line
NW156	012-030	N	AREI	LV	2012	NA	Breeding line
NW157	012-091	S	AREI	LV	2012	NA	Breeding line
NW158	013-01	N	AREI	LV	2013	NA	Breeding line
NW159	013-02	N	AREI	LV	2013	NA	Breeding line
NW160	013-047	N	AREI	LV	2013	NA	Breeding line
NW161	013-052	N	AREI	LV	2013	NA	Breeding line
NW162	013-066	S	AREI	LV	2013	NA	Breeding line
NW163	013-067	N	AREI	LV	2013	NA	Breeding line
NW164	013-069	S	AREI	LV	2013	NA	Breeding line
NW165	013-070	S	AREI	LV	2013	NA	Breeding line
NW166	013-073	N	AREI	LV	2013	NA	Breeding line
NW167	013-074	N	AREI	LV	2013	NA	Breeding line
NW168	013-075	S	AREI	LV	2013	NA	Breeding line
NW169	CKV 13-3	N	AREI	LV	2012	NA	Breeding line
NW170	CKV 17-3	N	AREI	LV	2013	NA	Breeding line
NW171	CKV 50-2	N	AREI	LV	2014	NA	Breeding line
NW172	10KV 15 FKV 30	N	AREI	LV	2010	NA	Breeding line
NW173	10 KV 3FKV 62	S	AREI	LV	2010	NA	Breeding line
NW174	10KV 3 FKV 64	S	AREI	LV	2010	NA	Breeding line
NW175	10KV 3 FKV 65	S	AREI	LV	2010	NA	Breeding line
NW176	10KV 3 FKV 68	S	AREI	LV	2010	NA	Breeding line
NW177	10KV 3 FKV 75	S	AREI	LV	2010	NA	Breeding line
NW178	10 KV 3FKV 102	S	AREI	LV	2010	NA	Breeding line
NW179	10 KV 3FKV 107	S	AREI	LV	2010	NA	Breeding line
NW180	10KV 3 FKV 117	S	AREI	LV	2010	NA	Breeding line
NW181	F-014-03	S	AREI	LV	2014	NA	Breeding line
NW182	F-015-021	S	AREI	LV	2015	NA	Breeding line
NW183	15KV 4 K31	N	AREI	LV	2015	NA	Breeding line
NW184	15KV13 K49	N	AREI	LV	2015	NA	Breeding line
NW185	I-9	S	AREI	LV	2016	NA	Breeding line
NW186	I-118	N	AREI	LV	2016	NA	Breeding line
NW187	I-111	N	AREI	LV	2016	NA	Breeding line
NW188	I-19	S	AREI	LV	2016	NA	Breeding line
NW189	I-35	S	AREI	LV	2016	NA	Breeding line
NW190	I-44	N	AREI	LV	2016	NA	Breeding line
NW191	I-63	N	AREI	LV	2016	NA	Breeding line
NW192	I-79	N	AREI	LV	2016	NA	Breeding line
NW193	I-90	N	AREI	LV	2016	NA	Breeding line
NW194	I-91	S	AREI	LV	2016	NA	Breeding line
NW195	I-92	N	AREI	LV	2016	NA	Breeding line
NW196	I-93	N	AREI	LV	2016	NA	Breeding line
NW197	I-94	S	AREI	LV	2016	NA	Breeding line
NW198	96-14-1907	S	AREI	LV	2006	NA	Breeding line
NW199	96-54-1796	S	AREI	LV	2006	NA	Breeding line
NW200	00-64-1087	S	AREI	LV	2005	NA	Breeding line
NW201	004-64-1083	N	AREI	LV	2005	NA	Breeding line
NW202	Alora	S	LAMMC	AT	2007	NA	Cultivar
NW203	Amantis	S	LAMMC	DK	2015	NA	Cultivar
NW204	Anabel	S	LAMMC	CZ	2014	NA	Cultivar
NW205	Camadra	S	LAMMC	CH	2012	NA	Cultivar
NW206	Caral	S	LAMMC	CH	2014	NA	Cultivar
NW207	Carasso	S	LAMMC	CH	2005	NA	Cultivar
NW208	Cervino	S	LAMMC	CH	2011	NA	Cultivar
NW209	CH Campala	S	LAMMC	CH	2008	NA	Cultivar
NW210	Countess	N	LAMMC	SE	2014	NA	Cultivar
NW211	Crickett	N	LAMMC	EE	2016	NA	Cultivar
NW212	Ethos	S	LAMMC	DE	2007	NA	Cultivar
NW213	Fiorina	S	LAMMC	CH	2002	NA	Cultivar
NW214	Flippen	N	LAMMC	EE	2018	NA	Cultivar
NW215	Florus	S	LAMMC	CZ	2014	NA	Cultivar
NW216	Goplana	S	LAMMC	PL	2015	NA	Cultivar
NW217	Kabot	S	LAMMC	CZ	2017	NA	Cultivar
NW218	Kandela	S	LAMMC	PL	2010	NA	Cultivar
NW219	Kanyuk	S	LAMMC	DE	2018	NA	Cultivar
NW220	Katoda	N	LAMMC	PL	2008	NA	Cultivar
NW221	KWS Akvilon	S	LAMMC	DE	2013	NA	Cultivar
NW222	KWS Mistral	S	LAMMC	DE	2015	NA	Cultivar
NW223	KWS Sharki	S	LAMMC	DE	2016	NA	Cultivar
NW224	KWS Willow	S	LAMMC	DE	2011	NA	Cultivar
NW225	Nimfa	S	LAMMC	PL	2016	NA	Cultivar
NW226	Nobless	N	LAMMC	NL	2014	NA	Cultivar
NW227	Rospuda	S	LAMMC	DE	2010	NA	Cultivar
NW228	Serenada	S	LAMMC	PL	2015	NA	Cultivar
NW229	Skandus	S	LAMMC	SE	2017	NA	Cultivar
NW230	Soliat	S	LAMMC	CH	2010	NA	Cultivar
NW231	Struna	N	LAMMC	PL	2013	NA	Cultivar
NW232	Telimena	S	LAMMC	AT	2016	NA	Cultivar
NW233	Togano	S	LAMMC	CH	2004	NA	Cultivar
NW234	Tonika	S	LAMMC	EE	2017	NA	Cultivar
NW235	Tritus	S	LAMMC	DE	2018	NA	Cultivar
NW236	Vanek	S	LAMMC	CZ	2004	NA	Cultivar
NW237	Varius	S	LAMMC	AT	2015	NA	Cultivar
NW238	Waluta	N	LAMMC	PL	2008	NA	Cultivar
NW239	Zenon	S	LAMMC	DE	2016	NA	Cultivar
NW240	DS-11	S	LAMMC	LT	2015	NA	Breeding line
NW241	DS-13	S	LAMMC	LT	2015	NA	Breeding line
NW242	DS-14	S	LAMMC	LT	2015	NA	Breeding line
NW243	DS-17	S	LAMMC	LT	2015	NA	Breeding line
NW244	DS-10-18-DH	S	LAMMC	LT	2015	NA	Breeding line
NW245	DS-11-27-DH	S	LAMMC	LT	2015	NA	Breeding line
NW246	DS-13-8-DH	S	LAMMC	LT	2015	NA	Breeding line
NW247	DS-14-3-DH	S	LAMMC	LT	2015	NA	Breeding line
NW248	DS-14-16-DH	S	LAMMC	LT	2015	NA	Breeding line
NW249	DS-15-14-DH	S	LAMMC	LT	2015	NA	Breeding line
NW250	DS-15-27-DH	S	LAMMC	LT	2015	NA	Breeding line
NW251	DS-17-11-DH	S	LAMMC	LT	2015	NA	Breeding line
NW252	DS-17-16-DH	S	LAMMC	LT	2015	NA	Breeding line
NW253	DS-17-23-DH	S	LAMMC	LT	2015	NA	Breeding line
NW254	DS-17-26-DH	S	LAMMC	LT	2015	NA	Breeding line
NW255	DS-18-10-DH	S	LAMMC	LT	2015	NA	Breeding line
NW256	DS-18-23-DH	S	LAMMC	LT	2015	NA	Breeding line
NW257	DS-513-5-DH	S	LAMMC	LT	2016	NA	Breeding line
NW258	DS-530-10-DH	S	LAMMC	LT	2016	NA	Breeding line
NW259	DS-560-2-DH	S	LAMMC	LT	2016	NA	Breeding line
NW260	DS-570-2-DH	S	LAMMC	LT	2016	NA	Breeding line
NW261	DS-627-5-DH	S	LAMMC	LT	2016	NA	Breeding line
NW262	DS-638-5-DH	S	LAMMC	LT	2016	NA	Breeding line
NW263	DS-654-12-DH	S	LAMMC	LT	2016	NA	Breeding line
NW264	DS-655-5-DH	S	LAMMC	LT	2016	NA	Breeding line
NW265	DS-655-7-DH	S	LAMMC	LT	2016	NA	Breeding line
NW266	DS-655-12-DH	S	LAMMC	LT	2016	NA	Breeding line
NW267	DS-566-8-DH	S	LAMMC	LT	2016	NA	Breeding line
NW268	DS-661-11-DH	S	LAMMC	LT	2016	NA	Breeding line
NW269	DS-661-13-DH	S	LAMMC	LT	2016	NA	Breeding line
NW270	DS-661-14-DH	S	LAMMC	LT	2016	NA	Breeding line
NW271	DS-672-2-DH	S	LAMMC	LT	2016	NA	Breeding line
NW272	DS-674-7-DH	S	LAMMC	LT	2016	NA	Breeding line
NW273	DS-720-2-DH	S	LAMMC	LT	2016	NA	Breeding line
NW274	DS-720-3-DH	S	LAMMC	LT	2016	NA	Breeding line
NW275	DS-720-14-DH	S	LAMMC	LT	2016	NA	Breeding line
NW276	DS-732-5-DH	S	LAMMC	LT	2016	NA	Breeding line
NW277	DS-762-1-DH	N	LAMMC	LT	2016	NA	Breeding line
NW278	DS-762-3-DH	N	LAMMC	LT	2016	NA	Breeding line
NW279	DS-775-13-DH	N	LAMMC	LT	2016	NA	Breeding line
NW280	DS-775-14-DH	N	LAMMC	LT	2016	NA	Breeding line
NW281	DS-779-2-DH	N	LAMMC	LT	2016	NA	Breeding line
NW282	DS-783-5-DH	N	LAMMC	LT	2016	NA	Breeding line
NW283	DS-836-1-DH	N	LAMMC	LT	2016	NA	Breeding line
NW284	DS-846-1-DH	S	LAMMC	LT	2016	NA	Breeding line
NW285	DS-871-1-DH	S	LAMMC	LT	2016	NA	Breeding line
NW286	DS-927-1-DH	S	LAMMC	LT	2016	NA	Breeding line
NW287	DS-516-2-DH	S	LAMMC	LT	2016	NA	Breeding line
NW288	DS-548-DH	S	LAMMC	LT	2016	NA	Breeding line
NW289	DS-627-10-DH	S	LAMMC	LT	2016	NA	Breeding line
NW290	DS-627-11-DH	N	LAMMC	LT	2016	NA	Breeding line
NW291	DS-647-DH	S	LAMMC	LT	2016	NA	Breeding line
NW292	DS-672-5-DH	S	LAMMC	LT	2016	NA	Breeding line
NW293	DS-674-9-DH	S	LAMMC	LT	2016	NA	Breeding line
NW294	DS-775-3-DH	N	LAMMC	LT	2016	NA	Breeding line
NW295	DS-775-16-DH	N	LAMMC	LT	2016	NA	Breeding line
NW296	DS-775-19-DH	N	LAMMC	LT	2016	NA	Breeding line
NW297	DS-779-1-DH	N	LAMMC	LT	2016	NA	Breeding line
NW298	DS-779-6-DH	N	LAMMC	LT	2016	NA	Breeding line
NW299	DS-868	S	LAMMC	LT	2016	NA	Breeding line
NW300	DS-858	S	LAMMC	LT	2016	NA	Breeding line

## Sheet: Table S2. Phenotypic data
Table S2. Phenotypic data for 12 field trials (location x year combination)
country	year	trial	genotypeID	plotID	block	rep	row	col	DH	PH	MAT	GY	TKW	GPC	TW	GDD	PTU
Lithuania	2021	LT21	NW001	NW001_A	1	1	1	1	66	73	101	444.5	33	15.6	74.4	592.8	650674
Lithuania	2021	LT21	NW001	NW001_B	2	2	6	26	66	67	101	436.2	30	15.4	72.3	592.8	650674
Lithuania	2021	LT21	NW002	NW002_A	1	1	2	1	64	76	101	453.3	31	14.8	73.8	557.3	592243
Lithuania	2021	LT21	NW002	NW002_B	2	2	5	26	65	79.7	101	549.8	27	16.2	69.6	575.35	621474
Lithuania	2021	LT21	NW003	NW003_A	1	1	3	1	62	68	101	400.4	30	15.6	72.8	518.15	532533
Lithuania	2021	LT21	NW003	NW003_B	2	2	4	26	63	70	101	568.8	28	16.5	70.2	537.8	562124
Lithuania	2021	LT21	NW004	NW004_A	1	1	4	1	63	82.3	101	505.8	38	13.8	75.6	537.8	562124
Lithuania	2021	LT21	NW004	NW004_B	2	2	3	26	64	91.3	101	660	30	14.6	73.4	557.3	592243
Lithuania	2021	LT21	NW005	NW005_A	1	1	5	1	62	70	101	400.7	30	15	75.8	518.15	532533
Lithuania	2021	LT21	NW005	NW005_B	2	2	2	26	62	72.7	101	575.6	27	15.7	72.5	518.15	532533
Lithuania	2021	LT21	NW006	NW006_A	1	1	6	1	65	77.3	101	325.9	32	15.1	74.5	575.35	621474
Lithuania	2021	LT21	NW006	NW006_B	2	2	1	26	65	87	101	545.9	27	16.8	71.4	575.35	621474
Lithuania	2021	LT21	NW007	NW007_A	1	1	7	1	64	80.7	101	344.5	32	14.6	76.8	557.3	592243
Lithuania	2021	LT21	NW007	NW007_B	2	2	1	27	63	99.7	101	651.5	32	15.3	75.9	537.8	562124
Lithuania	2021	LT21	NW008	NW008_A	1	1	8	1	66	71.7	101	210.6	25	15.9	69.8	592.8	650674
Lithuania	2021	LT21	NW008	NW008_B	2	2	2	27	65	80.7	101	527	26	16.2	68.2	575.35	621474
Lithuania	2021	LT21	NW009	NW009_A	1	1	9	1	66	84.7	101	433.1	34	13.9	78.9	592.8	650674
Lithuania	2021	LT21	NW009	NW009_B	2	2	3	27	65	92.7	101	674.6	32	15.4	75.9	575.35	621474
Lithuania	2021	LT21	NW010	NW010_A	1	1	10	1	65	83.7	101	374.9	32	14.4	75.1	575.35	621474
Lithuania	2021	LT21	NW010	NW010_B	2	2	4	27	65	90	101	609.8	30	15	72	575.35	621474
Lithuania	2021	LT21	NW011	NW011_A	1	1	11	1	66	71	101	288.5	29	15	73.5	592.8	650674
Lithuania	2021	LT21	NW011	NW011_B	2	2	5	27	66	71.3	101	560	28	15.3	72.2	592.8	650674
Lithuania	2021	LT21	NW012	NW012_A	1	1	12	1	64	73	101	251.5	38	15.2	71.8	557.3	592243
Lithuania	2021	LT21	NW012	NW012_B	2	2	6	27	64	71	101	417.7	32	15.2	70.8	557.3	592243
Lithuania	2021	LT21	NW013	NW013_A	1	1	12	2	62	69	101	281.6	41	15.2	78.3	518.15	532533
Lithuania	2021	LT21	NW013	NW013_B	2	2	7	27	62	72.7	101	477.6	38	15	77.6	518.15	532533
Lithuania	2021	LT21	NW014	NW014_A	1	1	11	2	63	72	101	257.1	38	17.7	76.6	537.8	562124
Lithuania	2021	LT21	NW014	NW014_B	2	2	8	27	63	70.7	101	297	38	17.6	76.4	537.8	562124
Lithuania	2021	LT21	NW015	NW015_A	1	1	10	2	67	67.7	101	186.7	24	14.6	70.9	609.05	679142
Lithuania	2021	LT21	NW015	NW015_B	2	2	9	27	68	67.7	101	363	20	14.7	67.3	625.3	708170
Lithuania	2021	LT21	NW016	NW016_A	1	1	9	2	62	66	101	275.3	26	16.2	73.3	518.15	532533
Lithuania	2021	LT21	NW016	NW016_B	2	2	10	27	62	65.7	101	428.4	24	17.4	69.9	518.15	532533
Lithuania	2021	LT21	NW017	NW017_A	1	1	8	2	63	65	101	241	30	16.6	71.2	537.8	562124
Lithuania	2021	LT21	NW017	NW017_B	2	2	11	27	63	65.3	101	416.8	26	17.5	68.4	537.8	562124
Lithuania	2021	LT21	NW018	NW018_A	1	1	7	2	66	69.7	101	280.7	28	15.1	72.7	592.8	650674
Lithuania	2021	LT21	NW018	NW018_B	2	2	12	27	65	72.7	101	442.4	24	15.7	69.1	575.35	621474
Lithuania	2021	LT21	NW019	NW019_A	1	1	6	2	64	57.3	102	257.9	39	15	80.2	557.3	592243
Lithuania	2021	LT21	NW019	NW019_B	2	2	12	28	65	55.7	102	341.9	34	14.9	77.6	575.35	621474
Lithuania	2021	LT21	NW020	NW020_A	1	1	5	2	62	73	101	276.9	39	18.4	75.7	518.15	532533
Lithuania	2021	LT21	NW020	NW020_B	2	2	11	28	63	75.3	101	409.6	38	18.9	75	537.8	562124
Lithuania	2021	LT21	NW021	NW021_A	1	1	4	2	62	81	101	465.9	40	15.4	79.3	518.15	532533
Lithuania	2021	LT21	NW021	NW021_B	2	2	10	28	63	73.7	101	534.1	37	15.5	78.8	537.8	562124
Lithuania	2021	LT21	NW022	NW022_A	1	1	3	2	62	80	101	517.6	38	13.5	76	518.15	532533
Lithuania	2021	LT21	NW022	NW022_B	2	2	9	28	62	79.3	101	513.7	35	13.6	74.5	518.15	532533
Lithuania	2021	LT21	NW023	NW023_A	1	1	2	2	65	74.7	101	321.6	27	15.1	73.2	575.35	621474
Lithuania	2021	LT21	NW023	NW023_B	2	2	8	28	66	69.3	101	359.1	22	15.9	69.2	592.8	650674
Lithuania	2021	LT21	NW024	NW024_A	1	1	1	2	65	73.3	101	407	30	15	74.7	575.35	621474
Lithuania	2021	LT21	NW024	NW024_B	2	2	7	28	66	68.3	101	401.3	26	16.8	71.6	592.8	650674
Lithuania	2021	LT21	NW025	NW025_A	1	1	1	3	65	75	101	458	32	14.7	76.1	575.35	621474
Lithuania	2021	LT21	NW025	NW025_B	2	2	6	28	66	73	101	410.7	27	15.2	72.6	592.8	650674
Lithuania	2021	LT21	NW026	NW026_A	1	1	2	3	65	72	101	491.2	31	15	75.2	575.35	621474
Lithuania	2021	LT21	NW026	NW026_B	2	2	5	28	65	71.7	101	563.5	28	14.8	71.2	575.35	621474
Lithuania	2021	LT21	NW027	NW027_A	1	1	3	3	65	75	101	464.3	32	14.9	74.5	575.35	621474
Lithuania	2021	LT21	NW027	NW027_B	2	2	4	28	64	77	101	665.1	28	14.8	72.7	557.3	592243
Lithuania	2021	LT21	NW028	NW028_A	1	1	4	3	64	83.3	101	463.4	30	15.2	72.3	557.3	592243
Lithuania	2021	LT21	NW028	NW028_B	2	2	3	28	64	88.3	101	620.6	28	14.6	70.3	557.3	592243
Lithuania	2021	LT21	NW029	NW029_A	1	1	5	3	66	82	101	465.1	34	14.8	77.6	592.8	650674
Lithuania	2021	LT21	NW029	NW029_B	2	2	2	28	65	83.7	101	632.3	31	14.2	74.9	575.35	621474
Lithuania	2021	LT21	NW030	NW030_A	1	1	6	3	66	82.3	101	470.5	34	14.8	76.4	592.8	650674
Lithuania	2021	LT21	NW030	NW030_B	2	2	1	28	66	92.3	101	649.9	31	14.5	73.4	592.8	650674
Lithuania	2021	LT21	NW031	NW031_A	1	1	7	3	67	70.7	101	303.5	30	16.7	73.9	609.05	679142
Lithuania	2021	LT21	NW031	NW031_B	2	2	1	29	65	75.7	101	474.9	32	15.5	72.8	575.35	621474
Lithuania	2021	LT21	NW032	NW032_A	1	1	8	3	67	68.3	101	289.1	33	15.8	74.6	609.05	679142
Lithuania	2021	LT21	NW032	NW032_B	2	2	2	29	65	73.3	101	541.7	31	14.9	71.5	575.35	621474
Lithuania	2021	LT21	NW033	NW033_A	1	1	9	3	63	87.3	101	299	34	14.9	76.3	537.8	562124
Lithuania	2021	LT21	NW033	NW033_B	2	2	3	29	63	95	101	549.8	31	14.1	74.8	537.8	562124
Lithuania	2021	LT21	NW034	NW034_A	1	1	10	3	65	66.7	101	217.8	28	15.9	74.5	575.35	621474
Lithuania	2021	LT21	NW034	NW034_B	2	2	4	29	64	68.3	101	431.9	26	15.4	69.6	557.3	592243
Lithuania	2021	LT21	NW035	NW035_A	1	1	11	3	66	74	101	368.5	32	16.1	74.7	592.8	650674
Lithuania	2021	LT21	NW035	NW035_B	2	2	5	29	65	71.3	101	522.3	29	15.4	73.1	575.35	621474
Lithuania	2021	LT21	NW036	NW036_A	1	1	12	3	69	82.3	101	163.3	23	18	73.2	640.55	736608
Lithuania	2021	LT21	NW036	NW036_B	2	2	6	29	69	81.3	101	368	20	18.2	70.8	640.55	736608
Lithuania	2021	LT21	NW037	NW037_A	1	1	12	4	69	81.3	101	172.3	23	17.8	73.7	640.55	736608
Lithuania	2021	LT21	NW037	NW037_B	2	2	7	29	69	80.3	101	324.2	20	19.1	69.3	640.55	736608
Lithuania	2021	LT21	NW038	NW038_A	1	1	11	4	67	78.7	101	348.8	34	14.2	75.4	609.05	679142
Lithuania	2021	LT21	NW038	NW038_B	2	2	8	29	67	75.7	101	448	30	15.5	71.7	609.05	679142
Lithuania	2021	LT21	NW039	NW039_A	1	1	10	4	63	75.7	101	301.5	34	16	73.9	537.8	562124
Lithuania	2021	LT21	NW039	NW039_B	2	2	9	29	63	80.7	101	424.4	30	16	70.6	537.8	562124
Lithuania	2021	LT21	NW040	NW040_A	1	1	9	4	63	82	101	312.7	34	15.9	74.7	537.8	562124
Lithuania	2021	LT21	NW040	NW040_B	2	2	10	29	65	87	101	515.8	34	16.4	73.1	575.35	621474
Lithuania	2021	LT21	NW041	NW041_A	1	1	8	4	66	57.7	101	242.3	34	15.2	77.7	592.8	650674
Lithuania	2021	LT21	NW041	NW041_B	2	2	11	29	66	71.7	101	440.1	33	15.5	75.3	592.8	650674
Lithuania	2021	LT21	NW042	NW042_A	1	1	7	4	66	75.7	101	387.8	37	14.1	76.8	592.8	650674
Lithuania	2021	LT21	NW042	NW042_B	2	2	12	29	66	83	101	536	34	14.5	74.3	592.8	650674
Lithuania	2021	LT21	NW043	NW043_A	1	1	6	4	66	93.3	101	338.4	32	15.3	73.2	592.8	650674
Lithuania	2021	LT21	NW043	NW043_B	2	2	12	30	63	92.7	101	432	30	16.3	71.6	537.8	562124
Lithuania	2021	LT21	NW044	NW044_A	1	1	5	4	63	93.7	101	417.3	34	15	76.2	537.8	562124
Lithuania	2021	LT21	NW044	NW044_B	2	2	11	30	63	89	101	511.7	32	16	73.2	537.8	562124
Lithuania	2021	LT21	NW045	NW045_A	1	1	4	4	61	99	101	266.2	36	17	76.9	497.65	502770
Lithuania	2021	LT21	NW045	NW045_B	2	2	10	30	62	87	101	441	36	17.6	76.5	518.15	532533
Lithuania	2021	LT21	NW046	NW046_A	1	1	3	4	64	89.3	101	555	32	15.5	70.3	557.3	592243
Lithuania	2021	LT21	NW046	NW046_B	2	2	9	30	65	87	101	512.1	28	15.5	68	575.35	621474
Lithuania	2021	LT21	NW047	NW047_A	1	1	2	4	64	66	101	452.2	31	15.5	75.1	557.3	592243
Lithuania	2021	LT21	NW047	NW047_B	2	2	8	30	66	64	101	480.8	28	15.9	72.2	592.8	650674
Lithuania	2021	LT21	NW048	NW048_A	1	1	1	4	65	78.3	101	497.8	31	15	75.4	575.35	621474
Lithuania	2021	LT21	NW048	NW048_B	2	2	7	30	66	68.7	101	418.2	26	16.3	70.8	592.8	650674
Lithuania	2021	LT21	NW049	NW049_A	1	1	1	5	63	69.3	101	445.5	30	15	76	537.8	562124
Lithuania	2021	LT21	NW049	NW049_B	2	2	6	30	64	63.7	101	423	26	15.5	73.2	557.3	592243
Lithuania	2021	LT21	NW050	NW050_A	1	1	2	5	63	77.3	101	466.7	32	14.1	73.4	537.8	562124
Lithuania	2021	LT21	NW050	NW050_B	2	2	5	30	63	73.3	101	466.7	28	14.5	69.9	537.8	562124
Lithuania	2021	LT21	NW051	NW051_A	1	1	3	5	64	83.7	101	661.5	33	14.2	73.8	557.3	592243
Lithuania	2021	LT21	NW051	NW051_B	2	2	4	30	64	76.7	101	651.6	32	13.8	73	557.3	592243
Lithuania	2021	LT21	NW052	NW052_A	1	1	4	5	64	88	101	592.7	34	13.8	74.7	557.3	592243
Lithuania	2021	LT21	NW052	NW052_B	2	2	3	30	64	79.7	101	633.7	35	13.4	74.5	557.3	592243
Lithuania	2021	LT21	NW053	NW053_A	1	1	5	5	64	89.3	101	428.2	30	15.3	74.2	557.3	592243
Lithuania	2021	LT21	NW053	NW053_B	2	2	2	30	64	86	101	490.2	30	15.6	71.8	557.3	592243
Lithuania	2021	LT21	NW054	NW054_A	1	1	6	5	62	79	101	315	48	16.9	76.9	518.15	532533
Lithuania	2021	LT21	NW054	NW054_B	2	2	1	30	62	83	101	464.9	48	16.3	75.8	518.15	532533
Lithuania	2021	LT21	NW055	NW055_A	1	1	7	5	68	82.7	101	301.5	30	14.1	73.8	625.3	708170
Lithuania	2021	LT21	NW055	NW055_B	2	2	1	31	68	89.7	101	424.7	29	14.6	72.2	625.3	708170
Lithuania	2021	LT21	NW056	NW056_A	1	1	8	5	64	83	101	272.7	30	14.7	74.7	557.3	592243
Lithuania	2021	LT21	NW056	NW056_B	2	2	2	31	64	88.3	101	527.1	29	15.1	73.4	557.3	592243
Lithuania	2021	LT21	NW057	NW057_A	1	1	9	5	64	79.7	101	410.3	32	13.7	76.3	557.3	592243
Lithuania	2021	LT21	NW057	NW057_B	2	2	3	31	64	83.7	101	647.4	30	13.7	75.1	557.3	592243
Lithuania	2021	LT21	NW058	NW058_A	1	1	10	5	66	68.7	101	314.5	28	14.3	76	592.8	650674
Lithuania	2021	LT21	NW058	NW058_B	2	2	4	31	65	68	101	532.8	28	15.2	73.8	575.35	621474
Lithuania	2021	LT21	NW059	NW059_A	1	1	11	5	66	71.7	101	381	28	13.7	75.3	592.8	650674
Lithuania	2021	LT21	NW059	NW059_B	2	2	5	31	66	74	101	474.7	28	15.3	71.9	592.8	650674
Lithuania	2021	LT21	NW060	NW060_A	1	1	12	5	67	69.3	101	426.9	27	13.7	74.6	609.05	679142
Lithuania	2021	LT21	NW060	NW060_B	2	2	6	31	67	64.7	101	434.4	27	14.7	72	609.05	679142
Lithuania	2021	LT21	NW061	NW061_A	1	1	12	6	64	65	101	329.2	31	13.9	75.7	557.3	592243
Lithuania	2021	LT21	NW061	NW061_B	2	2	7	31	64	68.7	101	431.2	32	15.1	72.7	557.3	592243
Lithuania	2021	LT21	NW062	NW062_A	1	1	11	6	63	67.3	101	412.7	31	13.7	77.1	537.8	562124
Lithuania	2021	LT21	NW062	NW062_B	2	2	8	31	63	65.3	101	488.5	31	15.2	74.3	537.8	562124
Lithuania	2021	LT21	NW063	NW063_A	1	1	10	6	66	72.3	101	464.9	32	14.3	75	592.8	650674
Lithuania	2021	LT21	NW063	NW063_B	2	2	9	31	66	72.7	101	492	32	15.1	72.9	592.8	650674
Lithuania	2021	LT21	NW064	NW064_A	1	1	9	6	64	75.3	101	439.5	33	13.7	73.5	557.3	592243
Lithuania	2021	LT21	NW064	NW064_B	2	2	10	31	64	79	101	621.1	33	15.7	71.1	557.3	592243
Lithuania	2021	LT21	NW065	NW065_A	1	1	8	6	64	74.7	101	404.7	31	14.7	76.5	557.3	592243
Lithuania	2021	LT21	NW065	NW065_B	2	2	11	31	65	79	101	550.1	30	16	73.5	575.35	621474
Lithuania	2021	LT21	NW066	NW066_A	1	1	7	6	61	65.3	101	256	34	16.7	75.4	497.65	502770
Lithuania	2021	LT21	NW066	NW066_B	2	2	12	31	62	62.7	101	349.6	35	17.3	75.2	518.15	532533
Lithuania	2021	LT21	NW067	NW067_A	1	1	6	6	62	74.7	101	355.9	36	15.2	75.4	518.15	532533
Lithuania	2021	LT21	NW067	NW067_B	2	2	12	32	63	70.7	101	396.2	34	15.3	72.8	537.8	562124
Lithuania	2021	LT21	NW068	NW068_A	1	1	5	6	66	83	101	617.4	34	13.9	75.6	592.8	650674
Lithuania	2021	LT21	NW068	NW068_B	2	2	11	32	67	78	101	526.1	31	15.3	71.5	609.05	679142
Lithuania	2021	LT21	NW069	NW069_A	1	1	4	6	64	88.3	101	658.4	34	14.7	70.8	557.3	592243
Lithuania	2021	LT21	NW069	NW069_B	2	2	10	32	65	77.7	101	621.1	36	15.3	70.2	575.35	621474
Lithuania	2021	LT21	NW070	NW070_A	1	1	3	6	65	87.7	101	604.4	34	14.2	72.4	575.35	621474
Lithuania	2021	LT21	NW070	NW070_B	2	2	9	32	65	83	101	580.4	33	14.7	70.9	575.35	621474
Lithuania	2021	LT21	NW071	NW071_A	1	1	2	6	66	75.3	101	592.7	40	13.5	76.1	592.8	650674
Lithuania	2021	LT21	NW071	NW071_B	2	2	8	32	68	72.3	101	585.5	35	14.5	73.6	625.3	708170
Lithuania	2021	LT21	NW072	NW072_A	1	1	1	6	65	82.3	101	608.3	36	14.7	74.7	575.35	621474
Lithuania	2021	LT21	NW072	NW072_B	2	2	7	32	66	79	101	598.7	35	14.9	72.6	592.8	650674
Lithuania	2021	LT21	NW073	NW073_A	1	1	1	7	66	79.3	101	603.9	33	14.3	76.2	592.8	650674
Lithuania	2021	LT21	NW073	NW073_B	2	2	6	32	67	71	101	394.1	30	14.1	74.5	609.05	679142
Lithuania	2021	LT21	NW074	NW074_A	1	1	2	7	63	76.3	101	558.3	36	13.2	75.3	537.8	562124
Lithuania	2021	LT21	NW074	NW074_B	2	2	5	32	64	72.7	101	541	33	13.8	72.5	557.3	592243
Lithuania	2021	LT21	NW075	NW075_A	1	1	3	7	66	82.7	101	638.6	38	14.3	75.8	592.8	650674
Lithuania	2021	LT21	NW075	NW075_B	2	2	4	32	66	73	101	545.5	34	14.6	72.4	592.8	650674
Lithuania	2021	LT21	NW076	NW076_A	1	1	4	7	66	100	101	649.7	32	14.1	72.5	592.8	650674
Lithuania	2021	LT21	NW076	NW076_B	2	2	3	32	67	95	101	588.6	28	15.1	68.8	609.05	679142
Lithuania	2021	LT21	NW077	NW077_A	1	1	5	7	65	83.3	101	685.6	36	13.1	76.6	575.35	621474
Lithuania	2021	LT21	NW077	NW077_B	2	2	2	32	65	77.3	101	582.7	30	13.7	72.8	575.35	621474
Lithuania	2021	LT21	NW078	NW078_A	1	1	6	7	64	78	101	394.8	29	15.9	75.6	557.3	592243
Lithuania	2021	LT21	NW078	NW078_B	2	2	1	32	64	76.7	101	404.7	26	16.2	72.8	557.3	592243
Lithuania	2021	LT21	NW079	NW079_A	1	1	7	7	65	84.7	101	400.7	32	14.1	72.9	575.35	621474
Lithuania	2021	LT21	NW079	NW079_B	2	2	1	33	64	87	101	473.6	31	14.4	71.5	557.3	592243
Lithuania	2021	LT21	NW080	NW080_A	1	1	8	7	65	83	101	356.8	32	14.4	71.3	575.35	621474
Lithuania	2021	LT21	NW080	NW080_B	2	2	2	33	65	83	101	500.7	28	14.7	68.1	575.35	621474
Lithuania	2021	LT21	NW081	NW081_A	1	1	9	7	64	80	101	527.8	38	12.6	76.7	557.3	592243
Lithuania	2021	LT21	NW081	NW081_B	2	2	3	33	65	83	101	538.2	34	13.2	74.3	575.35	621474
Lithuania	2021	LT21	NW082	NW082_A	1	1	10	7	65	77	101	514.6	38	14.8	74.9	575.35	621474
Lithuania	2021	LT21	NW082	NW082_B	2	2	4	33	64	77.7	101	596	34	14.9	72.8	557.3	592243
Lithuania	2021	LT21	NW083	NW083_A	1	1	11	7	64	75.7	101	397.8	42	15.8	76.9	557.3	592243
Lithuania	2021	LT21	NW083	NW083_B	2	2	5	33	64	80	101	538.3	42	15	76.3	557.3	592243
Lithuania	2021	LT21	NW084	NW084_A	1	1	12	7	65	76.3	101	315.2	38	15.6	76.4	575.35	621474
Lithuania	2021	LT21	NW084	NW084_B	2	2	6	33	65	76.7	101	454.1	37	15.3	76.1	575.35	621474
Lithuania	2021	LT21	NW085	NW085_A	1	1	12	8	68	68.7	101	403.6	34	13.7	74.2	625.3	708170
Lithuania	2021	LT21	NW085	NW085_B	2	2	7	33	68	82.7	101	691	36	14.1	73.9	625.3	708170
Lithuania	2021	LT21	NW086	NW086_A	1	1	11	8	65	75.3	101	466.7	37	13.8	75.1	575.35	621474
Lithuania	2021	LT21	NW086	NW086_B	2	2	8	33	65	82.7	101	665.9	34	14.2	72.9	575.35	621474
Lithuania	2021	LT21	NW087	NW087_A	1	1	10	8	64	82	101	470.9	29	14.4	71.8	557.3	592243
Lithuania	2021	LT21	NW087	NW087_B	2	2	9	33	65	83.3	101	463.3	26	15.7	69.2	575.35	621474
Lithuania	2021	LT21	NW088	NW088_A	1	1	9	8	63	92.3	101	467.6	32	15.7	75.3	537.8	562124
Lithuania	2021	LT21	NW088	NW088_B	2	2	10	33	63	96.7	101	572.7	32	17.6	74.2	537.8	562124
Lithuania	2021	LT21	NW089	NW089_A	1	1	8	8	63	76.3	101	512	31	14.2	73.6	537.8	562124
Lithuania	2021	LT21	NW089	NW089_B	2	2	11	33	63	79.7	101	526.4	28	15.5	70.6	537.8	562124
Lithuania	2021	LT21	NW090	NW090_A	1	1	7	8	65	89	101	451.8	33	14.6	73.2	575.35	621474
Lithuania	2021	LT21	NW090	NW090_B	2	2	12	33	66	89	101	491.1	32	14.9	71.9	592.8	650674
Lithuania	2021	LT21	NW091	NW091_A	1	1	6	8	68	71.3	101	531.6	36	14.2	75.2	625.3	708170
Lithuania	2021	LT21	NW091	NW091_B	2	2	12	34	67	74	101	527.8	32	14.1	73.1	609.05	679142
Lithuania	2021	LT21	NW092	NW092_A	1	1	5	8	63	88	101	578.8	34	15.5	77.1	537.8	562124
Lithuania	2021	LT21	NW092	NW092_B	2	2	11	34	64	89.3	101	532.6	30	15.4	72.9	557.3	592243
Lithuania	2021	LT21	NW093	NW093_A	1	1	4	8	66	78.7	101	652.5	38	15.5	72.7	592.8	650674
Lithuania	2021	LT21	NW093	NW093_B	2	2	10	34	67	76	101	581.5	36	15.9	72	609.05	679142
Lithuania	2021	LT21	NW094	NW094_A	1	1	3	8	64	94	101	715	34	14.3	75.6	557.3	592243
Lithuania	2021	LT21	NW094	NW094_B	2	2	9	34	66	94.3	101	649.7	32	14.2	75.1	592.8	650674
Lithuania	2021	LT21	NW095	NW095_A	1	1	2	8	62	73.3	101	685.6	36	14.5	78	518.15	532533
Lithuania	2021	LT21	NW095	NW095_B	2	2	8	34	63	74.3	101	672.7	30	15	75.5	537.8	562124
Lithuania	2021	LT21	NW096	NW096_A	1	1	1	8	66	84.3	101	612.3	32	14.8	75.3	592.8	650674
Lithuania	2021	LT21	NW096	NW096_B	2	2	7	34	66	83.7	101	604.4	30	15.4	71.7	592.8	650674
Lithuania	2021	LT21	NW097	NW097_A	1	1	1	9	67	80.3	101	587.6	36	14.2	71.7	609.05	679142
Lithuania	2021	LT21	NW097	NW097_B	2	2	6	34	67	78.7	101	577.6	34	13.1	71.1	609.05	679142
Lithuania	2021	LT21	NW098	NW098_A	1	1	2	9	67	80.3	101	718.2	33	13.3	74.6	609.05	679142
Lithuania	2021	LT21	NW098	NW098_B	2	2	5	34	67	73	101	444.9	26	14	69.7	609.05	679142
Lithuania	2021	LT21	NW099	NW099_A	1	1	3	9	65	82.3	101	704.8	38	13.9	72.6	575.35	621474
Lithuania	2021	LT21	NW099	NW099_B	2	2	4	34	65	74.7	101	599	34	14.2	69.9	575.35	621474
Lithuania	2021	LT21	NW100	NW100_A	1	1	4	9	64	86	101	711.4	35	14.4	75.1	557.3	592243
Lithuania	2021	LT21	NW100	NW100_B	2	2	3	34	65	79.3	101	603.6	32	14	72.9	575.35	621474
Lithuania	2021	LT21	NW101	NW101_A	1	1	5	9	67	92.3	101	632.8	34	14.2	74.2	609.05	679142
Lithuania	2021	LT21	NW101	NW101_B	2	2	2	34	67	86	101	531.3	29	14.2	70.8	609.05	679142
Lithuania	2021	LT21	NW102	NW102_A	1	1	6	9	66	68.7	101	432.2	30	15.1	72.3	592.8	650674
Lithuania	2021	LT21	NW102	NW102_B	2	2	1	34	66	76.7	101	455.7	27	15	69.9	592.8	650674
Lithuania	2021	LT21	NW103	NW103_A	1	1	7	9	65	82.3	101	487.7	30	15	74.8	575.35	621474
Lithuania	2021	LT21	NW103	NW103_B	2	2	1	35	64	82	101	505.9	29	14.1	73.9	557.3	592243
Lithuania	2021	LT21	NW104	NW104_A	1	1	8	9	65	72.3	101	560	34	13.6	75.5	575.35	621474
Lithuania	2021	LT21	NW104	NW104_B	2	2	2	35	65	76.7	101	569.7	35	13	74	575.35	621474
Lithuania	2021	LT21	NW105	NW105_A	1	1	9	9	65	80.7	101	474.4	32	14.6	74.2	575.35	621474
Lithuania	2021	LT21	NW105	NW105_B	2	2	3	35	65	77	101	453.1	28	15.1	72.6	575.35	621474
Lithuania	2021	LT21	NW106	NW106_A	1	1	10	9	63	85	101	565.3	34	15.8	76.1	537.8	562124
Lithuania	2021	LT21	NW106	NW106_B	2	2	4	35	63	82.3	101	618.9	34	15.6	75.6	537.8	562124
Lithuania	2021	LT21	NW107	NW107_A	1	1	11	9	65	72	101	437.9	30	16.4	71.1	575.35	621474
Lithuania	2021	LT21	NW107	NW107_B	2	2	5	35	64	70.7	101	522.7	28	15.9	70.1	557.3	592243
Lithuania	2021	LT21	NW108	NW108_A	1	1	12	9	64	76.7	101	359.1	32	15.8	74.9	557.3	592243
Lithuania	2021	LT21	NW108	NW108_B	2	2	6	35	65	72.3	101	448.7	31	15.4	74.1	575.35	621474
Lithuania	2021	LT21	NW109	NW109_A	1	1	12	10	66	76.7	101	352.2	32	15.8	75.7	592.8	650674
Lithuania	2021	LT21	NW109	NW109_B	2	2	7	35	65	87.3	101	665	29	16.7	73	575.35	621474
Lithuania	2021	LT21	NW110	NW110_A	1	1	11	10	66	81.3	101	405.6	36	15.3	74.7	592.8	650674
Lithuania	2021	LT21	NW110	NW110_B	2	2	8	35	65	94.3	101	650	34	16.1	74.3	575.35	621474
Lithuania	2021	LT21	NW111	NW111_A	1	1	10	10	65	78	101	543.7	32	14.8	76.1	575.35	621474
Lithuania	2021	LT21	NW111	NW111_B	2	2	9	35	65	83.3	101	676.4	30	14.6	74.4	575.35	621474
Lithuania	2021	LT21	NW112	NW112_A	1	1	9	10	66	80.3	101	483.6	30	15	76.5	592.8	650674
Lithuania	2021	LT21	NW112	NW112_B	2	2	10	35	65	81.7	101	638.3	29	15	75.5	575.35	621474
Lithuania	2021	LT21	NW113	NW113_A	1	1	8	10	66	77	101	503.6	34	15.1	73.5	592.8	650674
Lithuania	2021	LT21	NW113	NW113_B	2	2	11	35	65	85.7	101	596.3	32	15.1	72.1	575.35	621474
Lithuania	2021	LT21	NW114	NW114_A	1	1	7	10	63	81	101	468.3	32	17.2	76.3	537.8	562124
Lithuania	2021	LT21	NW114	NW114_B	2	2	12	35	64	85.7	101	520.9	30	16.3	75.1	557.3	592243
Lithuania	2021	LT21	NW115	NW115_A	1	1	6	10	63	77.3	101	509.9	33	14.8	72.8	537.8	562124
Lithuania	2021	LT21	NW115	NW115_B	2	2	12	36	64	85	101	563.5	30	15	71.2	557.3	592243
Lithuania	2021	LT21	NW116	NW116_A	1	1	5	10	64	85.3	101	512.9	31	16.7	74.8	557.3	592243
Lithuania	2021	LT21	NW116	NW116_B	2	2	11	36	65	96.3	101	540.5	24	17	70.4	575.35	621474
Lithuania	2021	LT21	NW117	NW117_A	1	1	4	10	64	82.3	101	682.7	32	14.4	75.5	557.3	592243
Lithuania	2021	LT21	NW117	NW117_B	2	2	10	36	64	80.7	101	564.6	30	14.2	74.6	557.3	592243
Lithuania	2021	LT21	NW118	NW118_A	1	1	3	10	63	88.3	101	610.1	36	16	73.6	537.8	562124
Lithuania	2021	LT21	NW118	NW118_B	2	2	9	36	63	92	101	595.6	33	15.9	72.2	537.8	562124
Lithuania	2021	LT21	NW119	NW119_A	1	1	2	10	62	79.7	101	635.4	34	15	76.3	518.15	532533
Lithuania	2021	LT21	NW119	NW119_B	2	2	8	36	62	79.7	101	494.8	31	15.8	74.9	518.15	532533
Lithuania	2021	LT21	NW120	NW120_A	1	1	1	10	64	77.7	101	582	36	15.6	74.5	557.3	592243
Lithuania	2021	LT21	NW120	NW120_B	2	2	7	36	64	77.3	101	522.3	33	16.1	73.1	557.3	592243
Lithuania	2021	LT21	NW121	NW121_A	1	1	1	11	64	80.3	101	495.7	32	16	76.6	557.3	592243
Lithuania	2021	LT21	NW121	NW121_B	2	2	6	36	64	81.3	101	471.9	29	15.7	76	557.3	592243
Lithuania	2021	LT21	NW122	NW122_A	1	1	2	11	63	86.7	101	654.3	34	15	75.2	537.8	562124
Lithuania	2021	LT21	NW122	NW122_B	2	2	5	36	63	82.3	101	644	32	14.7	75.6	537.8	562124
Lithuania	2021	LT21	NW123	NW123_A	1	1	3	11	64	83	101	579	32	14.4	74.3	557.3	592243
Lithuania	2021	LT21	NW123	NW123_B	2	2	4	36	64	80.3	101	622.8	34	14.3	74	557.3	592243
Lithuania	2021	LT21	NW124	NW124_A	1	1	4	11	65	80	101	566.4	32	14.9	73.5	575.35	621474
Lithuania	2021	LT21	NW124	NW124_B	2	2	3	36	64	82	101	570.2	33	14.8	72.5	557.3	592243
Lithuania	2021	LT21	NW125	NW125_A	1	1	5	11	64	87	101	540.7	34	14.9	76.9	557.3	592243
Lithuania	2021	LT21	NW125	NW125_B	2	2	2	36	65	80	101	491.4	34	14.2	74.7	575.35	621474
Lithuania	2021	LT21	NW126	NW126_A	1	1	6	11	66	78.7	101	422.6	32	14.6	75.2	592.8	650674
Lithuania	2021	LT21	NW126	NW126_B	2	2	1	36	66	79.7	101	472.6	33	13.7	72.4	592.8	650674
Lithuania	2021	LT21	NW127	NW127_A	1	1	7	11	66	78.7	101	406.6	34	14.7	73.9	592.8	650674
Lithuania	2021	LT21	NW127	NW127_B	2	2	1	37	66	77.7	101	393.9	32	14.6	71.5	592.8	650674
Lithuania	2021	LT21	NW128	NW128_A	1	1	8	11	66	82.3	101	474.7	32	14.7	72.7	592.8	650674
Lithuania	2021	LT21	NW128	NW128_B	2	2	2	37	66	78.3	101	501.8	30	14.9	71.1	592.8	650674
Lithuania	2021	LT21	NW129	NW129_A	1	1	9	11	66	80	101	351.1	32	14.9	74.3	592.8	650674
Lithuania	2021	LT21	NW129	NW129_B	2	2	3	37	65	81.3	101	592.6	32	15.3	72.9	575.35	621474
Lithuania	2021	LT21	NW130	NW130_A	1	1	10	11	65	77	101	405.8	32	15	73.1	575.35	621474
Lithuania	2021	LT21	NW130	NW130_B	2	2	4	37	64	81.3	101	640.2	32	15	72.8	557.3	592243
Lithuania	2021	LT21	NW131	NW131_A	1	1	11	11	66	78.3	101	419.6	34	15	73.9	592.8	650674
Lithuania	2021	LT21	NW131	NW131_B	2	2	5	37	65	77.7	101	568	32	15.7	72.6	575.35	621474
Lithuania	2021	LT21	NW132	NW132_A	1	1	12	11	66	76.7	101	342.2	37	15.1	76	592.8	650674
Lithuania	2021	LT21	NW132	NW132_B	2	2	6	37	65	82.7	101	435	37	15.6	76	575.35	621474
Lithuania	2021	LT21	NW133	NW133_A	1	1	12	12	66	73.7	101	390.2	36	14.9	77.1	592.8	650674
Lithuania	2021	LT21	NW133	NW133_B	2	2	7	37	66	81.3	101	525.7	36	16	76.8	592.8	650674
Lithuania	2021	LT21	NW134	NW134_A	1	1	11	12	66	82	101	405.9	34	14.4	76.2	592.8	650674
Lithuania	2021	LT21	NW134	NW134_B	2	2	8	37	66	91.3	101	622.2	32	15.5	74.7	592.8	650674
Lithuania	2021	LT21	NW135	NW135_A	1	1	10	12	65	77.7	101	517.4	32	14.1	74.9	575.35	621474
Lithuania	2021	LT21	NW135	NW135_B	2	2	9	37	65	85.3	101	611.5	30	14.1	74.8	575.35	621474
Lithuania	2021	LT21	NW136	NW136_A	1	1	9	12	66	78	101	367.1	33	14.6	74.4	592.8	650674
Lithuania	2021	LT21	NW136	NW136_B	2	2	10	37	66	80	101	543.2	31	15.7	73.5	592.8	650674
Lithuania	2021	LT21	NW137	NW137_A	1	1	8	12	68	80.7	101	505	32	14.1	73.1	625.3	708170
Lithuania	2021	LT21	NW137	NW137_B	2	2	11	37	69	92.3	101	566.4	29	15.2	71.6	640.55	736608
Lithuania	2021	LT21	NW138	NW138_A	1	1	7	12	67	71.7	101	496.1	34	14.6	73.9	609.05	679142
Lithuania	2021	LT21	NW138	NW138_B	2	2	12	37	67	76	101	453.1	32	14.7	73.1	609.05	679142
Lithuania	2021	LT21	NW139	NW139_A	1	1	6	12	66	92	101	537.5	36	13.2	76	592.8	650674
Lithuania	2021	LT21	NW139	NW139_B	2	2	12	38	67	85.7	101	413.1	30	14.9	72.8	609.05	679142
Lithuania	2021	LT21	NW140	NW140_A	1	1	5	12	65	90	101	476.7	34	14.2	74.7	575.35	621474
Lithuania	2021	LT21	NW140	NW140_B	2	2	11	38	66	89	101	447.7	32	14.8	71.7	592.8	650674
Lithuania	2021	LT21	NW141	NW141_A	1	1	4	12	65	94.7	101	516.3	34	14.7	72.5	575.35	621474
Lithuania	2021	LT21	NW141	NW141_B	2	2	10	38	66	98.3	101	597.3	31	15.3	69.6	592.8	650674
Lithuania	2021	LT21	NW142	NW142_A	1	1	3	12	68	86.7	101	757.3	36	13.9	75.5	625.3	708170
Lithuania	2021	LT21	NW142	NW142_B	2	2	9	38	69	90.3	101	674.4	33	14.5	72.3	640.55	736608
Lithuania	2021	LT21	NW143	NW143_A	1	1	2	12	67	90	101	583.1	32	14.9	73.8	609.05	679142
Lithuania	2021	LT21	NW143	NW143_B	2	2	8	38	67	89	101	656	30	16	71.1	609.05	679142
Lithuania	2021	LT21	NW144	NW144_A	1	1	1	12	67	84	101	526.7	34	14.7	73.7	609.05	679142
Lithuania	2021	LT21	NW144	NW144_B	2	2	7	38	68	82.7	101	500	34	15.4	72.2	625.3	708170
Lithuania	2021	LT21	NW145	NW145_A	1	1	1	13	64	72.3	101	547.5	31	13	74.6	557.3	592243
Lithuania	2021	LT21	NW145	NW145_B	2	2	6	38	65	67.7	101	573.2	33	12.9	76.4	575.35	621474
Lithuania	2021	LT21	NW146	NW146_A	1	1	2	13	65	83	101	625.5	33	14.6	74.6	575.35	621474
Lithuania	2021	LT21	NW146	NW146_B	2	2	5	38	65	75.7	101	555	30	14.9	72.3	575.35	621474
Lithuania	2021	LT21	NW147	NW147_A	1	1	3	13	64	77.3	101	598.6	36	14.4	74.2	557.3	592243
Lithuania	2021	LT21	NW147	NW147_B	2	2	4	38	64	70.3	101	583.5	34	15.3	71.9	557.3	592243
Lithuania	2021	LT21	NW148	NW148_A	1	1	4	13	65	109.7	101	561.7	41	15.2	76.5	575.35	621474
Lithuania	2021	LT21	NW148	NW148_B	2	2	3	38	65	107.7	101	600.5	40	15.1	76.3	575.35	621474
Lithuania	2021	LT21	NW149	NW149_A	1	1	5	13	66	86.7	101	583.5	32	13.9	73.7	592.8	650674
Lithuania	2021	LT21	NW149	NW149_B	2	2	2	38	66	80	101	548.3	32	14.9	70.7	592.8	650674
Lithuania	2021	LT21	NW150	NW150_A	1	1	6	13	64	81.7	101	651.6	43	13.6	76.4	557.3	592243
Lithuania	2021	LT21	NW150	NW150_B	2	2	1	38	65	82	101	560	41	14.6	73.2	575.35	621474
Lithuania	2021	LT21	NW151	NW151_A	1	1	7	13	63	87.3	101	650.7	34	13.9	75.1	537.8	562124
Lithuania	2021	LT21	NW151	NW151_B	2	2	1	39	63	81.3	101	483.3	33	14.8	72.7	537.8	562124
Lithuania	2021	LT21	NW152	NW152_A	1	1	8	13	66	79.7	101	503.5	30	14.7	70.6	592.8	650674
Lithuania	2021	LT21	NW152	NW152_B	2	2	2	39	67	73.7	101	537.3	29	15.7	68.7	609.05	679142
Lithuania	2021	LT21	NW153	NW153_A	1	1	9	13	66	82.7	101	488.1	32	14	74.5	592.8	650674
Lithuania	2021	LT21	NW153	NW153_B	2	2	3	39	65	88.3	101	646	32	15.4	72.3	575.35	621474
Lithuania	2021	LT21	NW154	NW154_A	1	1	10	13	64	84	101	589.7	36	13.9	74.5	557.3	592243
Lithuania	2021	LT21	NW154	NW154_B	2	2	4	39	64	78.3	101	657.6	36	14.9	73.3	557.3	592243
Lithuania	2021	LT21	NW155	NW155_A	1	1	11	13	66	82.3	101	486.4	32	14.4	74.2	592.8	650674
Lithuania	2021	LT21	NW155	NW155_B	2	2	5	39	65	77.3	101	527.8	32	15.1	73.1	575.35	621474
Lithuania	2021	LT21	NW156	NW156_A	1	1	12	13	67	87	101	518.7	32	14.1	71.9	609.05	679142
Lithuania	2021	LT21	NW156	NW156_B	2	2	6	39	67	81	101	531.4	32	14.9	71.6	609.05	679142
Lithuania	2021	LT21	NW157	NW157_A	1	1	12	14	69	79.7	101	434.5	29	15.3	72.5	640.55	736608
Lithuania	2021	LT21	NW157	NW157_B	2	2	7	39	69	85.7	101	422.1	30	16.3	70.9	640.55	736608
Lithuania	2021	LT21	NW158	NW158_A	1	1	11	14	70	77.3	101	484.6	27	14.9	71.8	655.85	765628
Lithuania	2021	LT21	NW158	NW158_B	2	2	8	39	69	85.3	101	601.7	28	15.4	69.6	640.55	736608
Lithuania	2021	LT21	NW159	NW159_A	1	1	10	14	69	83.7	101	581.1	30	14.1	69.9	640.55	736608
Lithuania	2021	LT21	NW159	NW159_B	2	2	9	39	69	92.3	101	621.1	30	15.1	68	640.55	736608
Lithuania	2021	LT21	NW160	NW160_A	1	1	9	14	65	81.3	101	444.8	31	14.2	73.1	575.35	621474
Lithuania	2021	LT21	NW160	NW160_B	2	2	10	39	66	87.3	101	592.4	32	14.9	72.2	592.8	650674
Lithuania	2021	LT21	NW161	NW161_A	1	1	8	14	66	76	101	523.8	32	14.9	74.4	592.8	650674
Lithuania	2021	LT21	NW161	NW161_B	2	2	11	39	66	79.3	101	450.2	31	14.5	72.7	592.8	650674
Lithuania	2021	LT21	NW162	NW162_A	1	1	7	14	66	79.3	101	503.3	32	14.7	74.7	592.8	650674
Lithuania	2021	LT21	NW162	NW162_B	2	2	12	39	67	77.7	101	281.6	29	15.1	72	609.05	679142
Lithuania	2021	LT21	NW163	NW163_A	1	1	6	14	66	77.3	101	467.5	32	14.4	73.9	592.8	650674
Lithuania	2021	LT21	NW163	NW163_B	2	2	12	40	68	75.3	101	347.6	31	14.5	70.9	625.3	708170
Lithuania	2021	LT21	NW164	NW164_A	1	1	5	14	67	87.3	101	638.5	32	14.4	74	609.05	679142
Lithuania	2021	LT21	NW164	NW164_B	2	2	11	40	67	81.7	101	458.2	31	13.9	71.7	609.05	679142
Lithuania	2021	LT21	NW165	NW165_A	1	1	4	14	67	85.7	101	639	33	14.7	74	609.05	679142
Lithuania	2021	LT21	NW165	NW165_B	2	2	10	40	68	88.7	101	547	32	14.3	71.3	625.3	708170
Lithuania	2021	LT21	NW166	NW166_A	1	1	3	14	67	92	101	752.3	30	15.1	73.4	609.05	679142
Lithuania	2021	LT21	NW166	NW166_B	2	2	9	40	68	95.3	101	589.3	31	14.6	71.9	625.3	708170
Lithuania	2021	LT21	NW167	NW167_A	1	1	2	14	65	85.7	101	586.7	32	14.5	73.5	575.35	621474
Lithuania	2021	LT21	NW167	NW167_B	2	2	8	40	65	88.3	101	637.1	30	15.4	70.5	575.35	621474
Lithuania	2021	LT21	NW168	NW168_A	1	1	1	14	68	86.3	101	581.3	29	14.8	72.3	625.3	708170
Lithuania	2021	LT21	NW168	NW168_B	2	2	7	40	69	85.3	101	502.2	28	16.2	71.1	640.55	736608
Lithuania	2021	LT21	NW169	NW169_A	1	1	1	15	68	87	101	596.6	30	14	71.9	625.3	708170
Lithuania	2021	LT21	NW169	NW169_B	2	2	6	40	68	89.7	101	517.4	30	14	70.4	625.3	708170
Lithuania	2021	LT21	NW170	NW170_A	1	1	2	15	65	84	101	650.8	32	14.1	74.7	575.35	621474
Lithuania	2021	LT21	NW170	NW170_B	2	2	5	40	65	85	101	596.4	34	14.1	74.1	575.35	621474
Lithuania	2021	LT21	NW171	NW171_A	1	1	3	15	65	90.3	101	649.3	31	14.6	73.4	575.35	621474
Lithuania	2021	LT21	NW171	NW171_B	2	2	4	40	65	86.3	101	571.2	33	15.5	72	575.35	621474
Lithuania	2021	LT21	NW172	NW172_A	1	1	4	15	64	87.3	101	654.2	35	15.2	76	557.3	592243
Lithuania	2021	LT21	NW172	NW172_B	2	2	3	40	64	86	101	629.8	34	16	74.7	557.3	592243
Lithuania	2021	LT21	NW173	NW173_A	1	1	5	15	66	86.3	101	630.9	34	14.3	78	592.8	650674
Lithuania	2021	LT21	NW173	NW173_B	2	2	2	40	65	89.7	101	515.7	33	14.9	75.4	575.35	621474
Lithuania	2021	LT21	NW174	NW174_A	1	1	6	15	67	76.3	101	521.2	32	14.6	78.1	609.05	679142
Lithuania	2021	LT21	NW174	NW174_B	2	2	1	40	66	82.3	101	468.3	32	15	75.2	592.8	650674
Lithuania	2021	LT21	NW175	NW175_A	1	1	7	15	67	79	101	414.8	32	14.8	76.7	609.05	679142
Lithuania	2021	LT21	NW175	NW175_B	2	2	1	41	65	80.7	101	537.5	32	14.3	75.1	575.35	621474
Lithuania	2021	LT21	NW176	NW176_A	1	1	8	15	66	79.3	101	460.6	32	14.8	76.3	592.8	650674
Lithuania	2021	LT21	NW176	NW176_B	2	2	2	41	65	86	101	525.8	32	14.2	74.4	575.35	621474
Lithuania	2021	LT21	NW177	NW177_A	1	1	9	15	66	82.7	101	450	34	14.1	76.4	592.8	650674
Lithuania	2021	LT21	NW177	NW177_B	2	2	3	41	65	82	101	577.4	34	14.4	76.1	575.35	621474
Lithuania	2021	LT21	NW178	NW178_A	1	1	10	15	66	85.7	101	482.8	33	14.9	75.3	592.8	650674
Lithuania	2021	LT21	NW178	NW178_B	2	2	4	41	65	85.3	101	652.4	33	14.9	74.7	575.35	621474
Lithuania	2021	LT21	NW179	NW179_A	1	1	11	15	67	88.7	101	440.9	34	14.5	75.9	609.05	679142
Lithuania	2021	LT21	NW179	NW179_B	2	2	5	41	66	87.3	101	541.5	32	14.3	74.9	592.8	650674
Lithuania	2021	LT21	NW180	NW180_A	1	1	12	15	66	80.3	102	445.3	33	15	77.6	592.8	650674
Lithuania	2021	LT21	NW180	NW180_B	2	2	6	41	66	81.3	101	510	34	14.5	77.1	592.8	650674
Lithuania	2021	LT21	NW181	NW181_A	1	1	12	16	68	73.7	101	467.5	30	14.8	73.2	625.3	708170
Lithuania	2021	LT21	NW181	NW181_B	2	2	7	41	68	77.7	101	516.3	30	16.1	69.6	625.3	708170
Lithuania	2021	LT21	NW182	NW182_A	1	1	11	16	68	89	101	596.6	30	15	73.6	625.3	708170
Lithuania	2021	LT21	NW182	NW182_B	2	2	8	41	67	91.7	101	591.1	30	15.7	72	609.05	679142
Lithuania	2021	LT21	NW183	NW183_A	1	1	10	16	66	81	101	499.5	29	15.2	71.7	592.8	650674
Lithuania	2021	LT21	NW183	NW183_B	2	2	9	41	65	88.3	101	618.2	32	14.5	72.2	575.35	621474
Lithuania	2021	LT21	NW184	NW184_A	1	1	9	16	66	83.7	101	480.5	30	14.9	74.9	592.8	650674
Lithuania	2021	LT21	NW184	NW184_B	2	2	10	41	67	78	101	516.1	32	15.1	74.4	609.05	679142
Lithuania	2021	LT21	NW185	NW185_A	1	1	8	16	68	75	101	353	28	15.5	75.5	625.3	708170
Lithuania	2021	LT21	NW185	NW185_B	2	2	11	41	68	73.7	101	415	30	14.9	75.6	625.3	708170
Lithuania	2021	LT21	NW186	NW186_A	1	1	7	16	68	71.3	101	384	28	15.4	77.3	625.3	708170
Lithuania	2021	LT21	NW186	NW186_B	2	2	12	41	69	70.3	101	323.4	29	15.5	76.5	640.55	736608
Lithuania	2021	LT21	NW187	NW187_A	1	1	6	16	68	74.3	101	376.8	30	15.4	77.8	625.3	708170
Lithuania	2021	LT21	NW187	NW187_B	2	2	12	42	67	69	101	328	30	15.7	76.8	609.05	679142
Lithuania	2021	LT21	NW188	NW188_A	1	1	5	16	66	83.7	101	481	30	15.2	77.6	592.8	650674
Lithuania	2021	LT21	NW188	NW188_B	2	2	11	42	67	70	101	409.2	30	15.2	75.9	609.05	679142
Lithuania	2021	LT21	NW189	NW189_A	1	1	4	16	66	91.7	101	625.3	34	14.5	76	592.8	650674
Lithuania	2021	LT21	NW189	NW189_B	2	2	10	42	67	81.3	101	490.6	34	14.6	73.7	609.05	679142
Lithuania	2021	LT21	NW190	NW190_A	1	1	3	16	64	94.3	101	669.8	35	16.2	74.4	557.3	592243
Lithuania	2021	LT21	NW190	NW190_B	1	2	9	42	64	88.7	101	539.6	34	15.2	73.2	557.3	592243
Lithuania	2021	LT21	NW191	NW191_A	1	1	2	16	66	73.7	101	460.6	30	15.6	77.3	592.8	650674
Lithuania	2021	LT21	NW191	NW191_B	2	2	8	42	66	76.3	101	434.5	32	16.8	75	592.8	650674
Lithuania	2021	LT21	NW192	NW192_A	1	1	1	16	67	78.3	101	388.7	28	15.1	76.6	609.05	679142
Lithuania	2021	LT21	NW192	NW192_B	2	2	7	42	68	76.7	101	505.1	30	16	75.8	625.3	708170
Lithuania	2021	LT21	NW193	NW193_A	1	1	1	17	66	76.7	101	360.7	27	15.3	77.1	592.8	650674
Lithuania	2021	LT21	NW193	NW193_B	2	2	6	42	68	71.3	101	400.5	29	15.4	76.6	625.3	708170
Lithuania	2021	LT21	NW194	NW194_A	1	1	2	17	67	87.3	101	532.3	30	15.3	76.7	609.05	679142
Lithuania	2021	LT21	NW194	NW194_B	2	2	5	42	66	83	101	537.5	30	15.3	75.5	592.8	650674
Lithuania	2021	LT21	NW195	NW195_A	1	1	3	17	66	85.7	101	443.5	32	15.8	76.1	592.8	650674
Lithuania	2021	LT21	NW195	NW195_B	2	2	4	42	65	80.7	101	525.7	32	16	76	575.35	621474
Lithuania	2021	LT21	NW196	NW196_A	1	1	4	17	66	81.3	101	447.1	30	15.6	76.3	592.8	650674
Lithuania	2021	LT21	NW196	NW196_B	2	2	3	42	65	78.3	101	553.1	30	16	76.1	575.35	621474
Lithuania	2021	LT21	NW197	NW197_A	1	1	5	17	66	74.7	101	426.4	32	15.3	78.2	592.8	650674
Lithuania	2021	LT21	NW197	NW197_B	2	2	2	42	65	81	101	551	32	16.2	76.5	575.35	621474
Lithuania	2021	LT21	NW198	NW198_A	1	1	6	17	68	82.7	101	529.4	32	14.3	74.3	625.3	708170
Lithuania	2021	LT21	NW198	NW198_B	2	2	1	42	66	84.7	101	552.8	30	14.3	70.6	592.8	650674
Lithuania	2021	LT21	NW199	NW199_A	1	1	7	17	68	87.3	101	570.1	33	14.6	73.6	625.3	708170
Lithuania	2021	LT21	NW199	NW199_B	2	2	1	43	66	83	101	609.9	32	13.9	71.2	592.8	650674
Lithuania	2021	LT21	NW200	NW200_A	1	1	8	17	67	84.3	101	535	31	15.1	72.1	609.05	679142
Lithuania	2021	LT21	NW200	NW200_B	2	2	2	43	66	88.3	101	707.8	30	15.1	71.4	592.8	650674
Lithuania	2021	LT21	NW201	NW201_A	1	1	9	17	69	92	101	578.5	30	14.5	72.6	640.55	736608
Lithuania	2021	LT21	NW201	NW201_B	2	2	3	43	68	90.7	101	683.8	28	15	69.4	625.3	708170
Lithuania	2021	LT21	NW202	NW202_A	1	1	10	17	66	79.3	101	588.1	28	13.9	75.8	592.8	650674
Lithuania	2021	LT21	NW202	NW202_B	2	2	4	43	65	79.7	101	667.6	30	14.3	74.1	575.35	621474
Lithuania	2021	LT21	NW203	NW203_A	1	1	11	17	69	83.7	101	553.9	31	13.7	71.8	640.55	736608
Lithuania	2021	LT21	NW203	NW203_B	2	2	5	43	69	82	101	586.2	31	14.4	69.7	640.55	736608
Lithuania	2021	LT21	NW204	NW204_A	1	1	12	17	66	62.3	101	477	30	12.9	77	592.8	650674
Lithuania	2021	LT21	NW204	NW204_B	2	2	6	43	66	65.7	101	544.3	32	13.2	74.9	592.8	650674
Lithuania	2021	LT21	NW205	NW205_A	1	1	12	18	66	68.7	101	416.8	34	15.2	78.2	592.8	650674
Lithuania	2021	LT21	NW205	NW205_B	2	2	7	43	66	72	101	616.6	34	15.5	75.9	592.8	650674
Lithuania	2021	LT21	NW206	NW206_A	1	1	11	18	64	66.3	101	421.7	32	15.7	75.2	557.3	592243
Lithuania	2021	LT21	NW206	NW206_B	2	2	8	43	63	65.3	101	561.8	34	16.4	74	537.8	562124
Lithuania	2021	LT21	NW207	NW207_A	1	1	10	18	67	81	101	442.9	32	16	76.5	609.05	679142
Lithuania	2021	LT21	NW207	NW207_B	2	2	9	43	67	81.3	101	403.4	31	16.2	74.8	609.05	679142
Lithuania	2021	LT21	NW208	NW208_A	1	1	9	18	67	77.3	101	440.2	30	16.2	75.1	609.05	679142
Lithuania	2021	LT21	NW208	NW208_B	2	2	10	43	67	72.3	101	383.8	29	16.5	74.6	609.05	679142
Lithuania	2021	LT21	NW209	NW209_A	1	1	8	18	63	64.3	101	480.2	34	14.6	77.3	537.8	562124
Lithuania	2021	LT21	NW209	NW209_B	2	2	11	43	64	63	101	364.2	32	15.1	75.7	557.3	592243
Lithuania	2021	LT21	NW210	NW210_A	1	1	7	18	66	74.3	101	529.5	28	14.1	74.5	592.8	650674
Lithuania	2021	LT21	NW210	NW210_B	2	2	12	43	68	73.7	101	400.7	28	14.9	73.6	625.3	708170
Lithuania	2021	LT21	NW211	NW211_A	1	1	6	18	64	71.7	101	464.1	29	13.1	77.9	557.3	592243
Lithuania	2021	LT21	NW211	NW211_B	2	2	12	44	66	72.7	101	516	27	14	76.9	592.8	650674
Lithuania	2021	LT21	NW212	NW212_A	1	1	5	18	66	74.3	101	655	30	13.8	76.9	592.8	650674
Lithuania	2021	LT21	NW212	NW212_B	2	2	11	44	67	65.7	101	405	29	14.3	74.6	609.05	679142
Lithuania	2021	LT21	NW213	NW213_A	1	1	4	18	65	77.3	101	646.5	34	15.5	74	575.35	621474
Lithuania	2021	LT21	NW213	NW213_B	2	2	10	44	65	67	101	478.8	32	15.3	74.2	575.35	621474
Lithuania	2021	LT21	NW214	NW214_A	1	1	3	18	66	87.7	101	667.8	32	14.7	74.3	592.8	650674
Lithuania	2021	LT21	NW214	NW214_B	2	2	9	44	64	78	101	542.6	28	14.8	73.5	557.3	592243
Lithuania	2021	LT21	NW215	NW215_A	1	1	2	18	64	83.3	101	661.8	32	14.1	77.1	557.3	592243
Lithuania	2021	LT21	NW215	NW215_B	2	2	8	44	64	78	101	664.3	29	15.2	75.8	557.3	592243
Lithuania	2021	LT21	NW216	NW216_A	1	1	1	18	69	78.7	101	542.5	35	13.7	72.3	640.55	736608
Lithuania	2021	LT21	NW216	NW216_B	2	2	7	44	69	79.7	101	656.8	30	15	70.6	640.55	736608
Lithuania	2021	LT21	NW217	NW217_A	1	1	1	19	66	72.7	101	550.4	38	13.9	74	592.8	650674
Lithuania	2021	LT21	NW217	NW217_B	2	2	6	44	67	70	101	608.8	33	14.8	73.6	609.05	679142
Lithuania	2021	LT21	NW218	NW218_A	1	1	2	19	67	83	101	653.3	32	13.9	71.7	609.05	679142
Lithuania	2021	LT21	NW218	NW218_B	2	2	5	44	67	80	101	641	30	14.6	70.2	609.05	679142
Lithuania	2021	LT21	NW219	NW219_A	1	1	3	19	65	84.7	101	855.8	37	13.7	74.6	575.35	621474
Lithuania	2021	LT21	NW219	NW219_B	2	2	4	44	65	80.7	101	836.3	37	14.1	74	575.35	621474
Lithuania	2021	LT21	NW220	NW220_A	1	1	4	19	67	91.3	101	727.7	35	13.7	76.5	609.05	679142
Lithuania	2021	LT21	NW220	NW220_B	2	2	3	44	66	91.7	101	709	34	13.8	76.5	592.8	650674
Lithuania	2021	LT21	NW221	NW221_A	1	1	5	19	67	83.3	101	635.3	32	13.7	77.1	609.05	679142
Lithuania	2021	LT21	NW221	NW221_B	2	2	2	44	66	75	101	558.3	30	14.9	75.4	592.8	650674
Lithuania	2021	LT21	NW222	NW222_A	1	1	6	19	63	70.7	101	560	36	13.9	78.9	537.8	562124
Lithuania	2021	LT21	NW222	NW222_B	2	2	1	44	63	74.3	101	574.7	35	14.3	76.1	537.8	562124
Lithuania	2021	LT21	NW223	NW223_A	1	1	7	19	67	82.7	101	619.3	36	14.1	78.2	609.05	679142
Lithuania	2021	LT21	NW223	NW223_B	2	2	1	45	66	82.3	101	647.9	35	14.8	75.1	592.8	650674
Lithuania	2021	LT21	NW224	NW224_A	1	1	8	19	69	72.7	101	446.4	32	13.6	73.4	640.55	736608
Lithuania	2021	LT21	NW224	NW224_B	2	2	2	45	69	77	101	544.7	32	15.7	71.8	640.55	736608
Lithuania	2021	LT21	NW225	NW225_A	1	1	9	19	69	77.3	101	585	34	14.4	70.1	640.55	736608
Lithuania	2021	LT21	NW225	NW225_B	2	2	3	45	69	79.7	101	591.1	33	15.4	68.4	640.55	736608
Lithuania	2021	LT21	NW226	NW226_A	1	1	10	19	66	77.3	101	611.7	28	14.1	74.9	592.8	650674
Lithuania	2021	LT21	NW226	NW226_B	2	2	4	45	66	77.3	101	630.2	31	14.3	76	592.8	650674
Lithuania	2021	LT21	NW227	NW227_A	1	1	11	19	64	80	101	632.2	35	13.3	73.9	557.3	592243
Lithuania	2021	LT21	NW227	NW227_B	2	2	5	45	64	80.3	101	627.3	35	13.8	71.9	557.3	592243
Lithuania	2021	LT21	NW228	NW228_A	1	1	12	19	69	77	101	570	36	13.5	71.5	640.55	736608
Lithuania	2021	LT21	NW228	NW228_B	2	2	6	45	69	76.3	101	597	35	15.2	70.2	640.55	736608
Lithuania	2021	LT21	NW229	NW229_A	1	1	12	20	67	67.7	101	512.5	36	13.3	77.1	609.05	679142
Lithuania	2021	LT21	NW229	NW229_B	2	2	7	45	67	74	101	661.3	34	14.6	74.6	609.05	679142
Lithuania	2021	LT21	NW230	NW230_A	1	1	11	20	63	78.3	101	511.4	33	15.1	79.3	537.8	562124
Lithuania	2021	LT21	NW230	NW230_B	2	2	8	45	63	74.3	101	505.5	33	16.2	78.4	537.8	562124
Lithuania	2021	LT21	NW231	NW231_A	1	1	10	20	66	90.3	101	645.9	34	12.9	75.4	592.8	650674
Lithuania	2021	LT21	NW231	NW231_B	2	2	9	45	66	92.3	101	586.2	32	13.8	75.2	592.8	650674
Lithuania	2021	LT21	NW232	NW232_A	1	1	9	20	66	82.7	101	648.2	36	13.7	69.4	592.8	650674
Lithuania	2021	LT21	NW232	NW232_B	2	2	10	45	67	77	101	536.2	35	14.6	69.9	609.05	679142
Lithuania	2021	LT21	NW233	NW233_A	1	1	8	20	64	69.3	101	487	36	14.3	73.9	557.3	592243
Lithuania	2021	LT21	NW233	NW233_B	2	2	11	45	64	62.3	101	417.5	31	15.3	72.8	557.3	592243
Lithuania	2021	LT21	NW234	NW234_A	1	1	7	20	68	84.7	101	651.6	33	12.2	75.8	625.3	708170
Lithuania	2021	LT21	NW234	NW234_B	2	2	12	45	69	80.3	101	437.2	27	14	73.4	640.55	736608
Lithuania	2021	LT21	NW235	NW235_A	1	1	6	20	63	85	101	613.1	34	13.2	76.3	537.8	562124
Lithuania	2021	LT21	NW235	NW235_B	2	2	12	46	64	77	101	482.9	32	14.2	75.2	557.3	592243
Lithuania	2021	LT21	NW236	NW236_A	1	1	5	20	64	83.7	101	757.5	40	14	80.2	557.3	592243
Lithuania	2021	LT21	NW236	NW236_B	2	2	11	46	65	76.7	101	497.8	40	13.8	79.8	575.35	621474
Lithuania	2021	LT21	NW237	NW237_A	1	1	4	20	68	71	101	635.3	38	15.7	73.4	625.3	708170
Lithuania	2021	LT21	NW237	NW237_B	2	2	10	46	69	57	101	397.5	34	15.7	71.7	640.55	736608
Lithuania	2021	LT21	NW238	NW238_A	1	1	3	20	66	95	101	748.4	36	13.5	76.1	592.8	650674
Lithuania	2021	LT21	NW238	NW238_B	2	2	9	46	66	84	101	582	36	13.4	76.3	592.8	650674
Lithuania	2021	LT21	NW239	NW239_A	1	1	2	20	66	79	101	707.6	32	14.8	76.8	592.8	650674
Lithuania	2021	LT21	NW239	NW239_B	2	2	8	46	67	77	101	586.9	32	15.5	75.4	609.05	679142
Lithuania	2021	LT21	NW240	NW240_A	1	1	1	20	69	84	101	578.7	31	13.8	73.2	640.55	736608
Lithuania	2021	LT21	NW240	NW240_B	2	2	7	46	69	79.7	101	586.4	33	14.7	72.8	640.55	736608
Lithuania	2021	LT21	NW241	NW241_A	1	1	1	21	69	80	101	568.6	32	13.8	71.9	640.55	736608
Lithuania	2021	LT21	NW241	NW241_B	2	2	6	46	69	79	101	512	31	14.5	71	640.55	736608
Lithuania	2021	LT21	NW242	NW242_A	1	1	2	21	65	82.3	101	626.6	36	13.7	75.1	575.35	621474
Lithuania	2021	LT21	NW242	NW242_B	2	2	5	46	65	80.3	101	642.4	37	14.1	75.9	575.35	621474
Lithuania	2021	LT21	NW243	NW243_A	1	1	3	21	67	96.3	101	666.9	33	13.5	73.5	609.05	679142
Lithuania	2021	LT21	NW243	NW243_B	2	2	4	46	67	89.7	101	620.5	32	14.4	72.3	609.05	679142
Lithuania	2021	LT21	NW244	NW244_A	1	1	4	21	68	86.7	101	694.8	30	14	74.3	625.3	708170
Lithuania	2021	LT21	NW244	NW244_B	2	2	3	46	67	84	101	626.2	28	14.9	73	609.05	679142
Lithuania	2021	LT21	NW245	NW245_A	1	1	5	21	68	86	101	601.7	42	15.2	74.2	625.3	708170
Lithuania	2021	LT21	NW245	NW245_B	2	2	2	46	67	84	101	577.6	37	15.3	72.7	609.05	679142
Lithuania	2021	LT21	NW246	NW246_A	1	1	6	21	69	85.3	101	563.5	33	13.2	75.1	640.55	736608
Lithuania	2021	LT21	NW246	NW246_B	2	2	1	46	68	86.7	101	547.7	32	13.7	71.6	625.3	708170
Lithuania	2021	LT21	NW247	NW247_A	1	1	7	21	65	81.3	101	585.7	38	13.8	71.2	575.35	621474
Lithuania	2021	LT21	NW247	NW247_B	2	2	1	47	65	83.7	101	590.3	37	13.8	71.1	575.35	621474
Lithuania	2021	LT21	NW248	NW248_A	1	1	8	21	64	71.3	101	563.5	31	13.9	70.5	557.3	592243
Lithuania	2021	LT21	NW248	NW248_B	2	2	2	47	64	73.7	101	637.5	30	14.6	70.3	557.3	592243
Lithuania	2021	LT21	NW249	NW249_A	1	1	9	21	71	90	101	542.7	28	14.3	70.8	671.95	796118
Lithuania	2021	LT21	NW249	NW249_B	2	2	3	47	71	91.3	102	518.9	29	15.2	72.5	671.95	796118
Lithuania	2021	LT21	NW250	NW250_A	1	1	10	21	69	79.3	101	573.5	36	14.2	71.3	640.55	736608
Lithuania	2021	LT21	NW250	NW250_B	2	2	4	47	68	76	101	581.9	34	14.6	70.7	625.3	708170
Lithuania	2021	LT21	NW251	NW251_A	1	1	11	21	68	81.7	101	595.7	36	14.4	70.2	625.3	708170
Lithuania	2021	LT21	NW251	NW251_B	2	2	5	47	68	81	101	676	38	13.6	71.9	625.3	708170
Lithuania	2021	LT21	NW252	NW252_A	1	1	12	21	66	82	101	563.6	36	13.6	73.7	592.8	650674
Lithuania	2021	LT21	NW252	NW252_B	2	2	6	47	67	79	101	619.9	34	14	73.1	609.05	679142
Lithuania	2021	LT21	NW253	NW253_A	1	1	12	22	70	80	101	471.6	33	14.1	74.2	655.85	765628
Lithuania	2021	LT21	NW253	NW253_B	2	2	7	47	69	81	101	524.2	31	15	73.7	640.55	736608
Lithuania	2021	LT21	NW254	NW254_A	1	1	11	22	67	79.3	101	633	36	13.9	70.6	609.05	679142
Lithuania	2021	LT21	NW254	NW254_B	2	2	8	47	66	82.7	101	639.5	37	14	70.7	592.8	650674
Lithuania	2021	LT21	NW255	NW255_A	1	1	10	22	66	76	101	618.9	39	15.1	74	592.8	650674
Lithuania	2021	LT21	NW255	NW255_B	2	2	9	47	66	67.3	101	544.6	38	13.8	74.4	592.8	650674
Lithuania	2021	LT21	NW256	NW256_A	1	1	9	22	64	74.3	101	616	36	13.5	70.5	557.3	592243
Lithuania	2021	LT21	NW256	NW256_B	2	2	10	47	65	65	101	518.5	33	13.3	70.7	575.35	621474
Lithuania	2021	LT21	NW257	NW257_A	1	1	8	22	70	80.7	101	457	30	14.5	70.9	655.85	765628
Lithuania	2021	LT21	NW257	NW257_B	2	2	11	47	70	79	102	493.8	30	14.1	73	655.85	765628
Lithuania	2021	LT21	NW258	NW258_A	1	1	7	22	72	92	102	503.1	34	14.2	76.4	689.55	469774
Lithuania	2021	LT21	NW258	NW258_B	2	2	12	47	73	96.3	103	443.1	30	14.6	76.1	708.3	494637
Lithuania	2021	LT21	NW259	NW259_A	1	1	6	22	70	77.7	101	523.6	38	13.6	74.1	655.85	765628
Lithuania	2021	LT21	NW259	NW259_B	2	2	12	48	71	75	101	458.5	32	15.1	72.2	671.95	796118
Lithuania	2021	LT21	NW260	NW260_A	1	1	5	22	66	67.7	101	693.1	34	13.8	73.5	592.8	650674
Lithuania	2021	LT21	NW260	NW260_B	2	2	11	48	66	65.3	101	502.9	31	14.5	71.8	592.8	650674
Lithuania	2021	LT21	NW261	NW261_A	1	1	4	22	66	79	101	687.1	31	14	75.5	592.8	650674
Lithuania	2021	LT21	NW261	NW261_B	2	2	10	48	67	65.7	101	461.2	30	13.1	74.4	609.05	679142
Lithuania	2021	LT21	NW262	NW262_A	1	1	3	22	69	87.7	102	690.7	28	13.9	76.8	640.55	736608
Lithuania	2021	LT21	NW262	NW262_B	2	2	9	48	70	77	102	539.8	28	13.2	76	655.85	765628
Lithuania	2021	LT21	NW263	NW263_A	1	1	2	22	66	77.3	101	669.2	34	13.8	75	592.8	650674
Lithuania	2021	LT21	NW263	NW263_B	2	2	8	48	67	84.7	101	728.4	31	14.7	72.6	609.05	679142
Lithuania	2021	LT21	NW264	NW264_A	1	1	1	22	65	80.7	101	637.5	42	15.6	73	575.35	621474
Lithuania	2021	LT21	NW264	NW264_B	2	2	7	48	65	82.7	101	670	40	14.9	72.6	575.35	621474
Lithuania	2021	LT21	NW265	NW265_A	1	1	1	23	64	87.3	101	673.5	38	13.8	76.1	557.3	592243
Lithuania	2021	LT21	NW265	NW265_B	2	2	6	48	64	84.7	101	649.3	36	13.8	74.6	557.3	592243
Lithuania	2021	LT21	NW266	NW266_A	1	1	2	23	63	70	101	678.9	44	13.9	77.7	537.8	562124
Lithuania	2021	LT21	NW266	NW266_B	2	2	5	48	64	74	101	680	42	14.5	76.9	557.3	592243
Lithuania	2021	LT21	NW267	NW267_A	1	1	3	23	65	86.3	101	743.9	42	13.8	76.3	575.35	621474
Lithuania	2021	LT21	NW267	NW267_B	2	2	4	48	65	78	101	723.3	36	13.9	75.4	575.35	621474
Lithuania	2021	LT21	NW268	NW268_A	1	1	4	23	67	85.3	101	789.7	42	14.2	75.8	609.05	679142
Lithuania	2021	LT21	NW268	NW268_B	2	2	3	48	66	79.3	101	703.3	40	14.4	75.4	592.8	650674
Lithuania	2021	LT21	NW269	NW269_A	1	1	5	23	66	91.3	101	712.4	36	14	74	592.8	650674
Lithuania	2021	LT21	NW269	NW269_B	2	2	2	48	66	85.3	101	664.3	34	14	74.5	592.8	650674
Lithuania	2021	LT21	NW270	NW270_A	1	1	6	23	66	72.3	101	583.7	32	14.5	72.6	592.8	650674
Lithuania	2021	LT21	NW270	NW270_B	2	2	1	48	65	75	101	582.3	32	15.2	72	575.35	621474
Lithuania	2021	LT21	NW271	NW271_A	1	1	7	23	67	92	101	518.7	32	14	73.2	609.05	679142
Lithuania	2021	LT21	NW271	NW271_B	2	2	1	49	66	99.7	101	587.1	30	14.1	71	592.8	650674
Lithuania	2021	LT21	NW272	NW272_A	1	1	8	23	67	93.7	101	491.7	34	13.6	72.3	609.05	679142
Lithuania	2021	LT21	NW272	NW272_B	2	2	2	49	67	96.3	101	576.8	29	14.7	69.6	609.05	679142
Lithuania	2021	LT21	NW273	NW273_A	1	1	9	23	65	83	101	614.8	40	13.2	77.5	575.35	621474
Lithuania	2021	LT21	NW273	NW273_B	2	2	3	49	66	92.7	101	643.5	38	14.3	74.8	592.8	650674
Lithuania	2021	LT21	NW274	NW274_A	1	1	10	23	66	86	101	633.1	40	14.2	74.9	592.8	650674
Lithuania	2021	LT21	NW274	NW274_B	2	2	4	49	65	81.7	101	788.6	37	13	78.5	575.35	621474
Lithuania	2021	LT21	NW275	NW275_A	1	1	11	23	66	86.7	101	623.9	36	14.1	76.8	592.8	650674
Lithuania	2021	LT21	NW275	NW275_B	2	2	5	49	65	87	101	674.9	36	14.2	77.8	575.35	621474
Lithuania	2021	LT21	NW276	NW276_A	1	1	12	23	64	83	101	556.8	44	13.5	74.4	557.3	592243
Lithuania	2021	LT21	NW276	NW276_B	2	2	6	49	64	88	101	660.9	42	13.7	75.1	557.3	592243
Lithuania	2021	LT21	NW277	NW277_A	1	1	12	24	65	70.3	101	516.7	35	14.3	73.6	575.35	621474
Lithuania	2021	LT21	NW277	NW277_B	2	2	7	49	64	75.7	101	705.4	34	14.5	73.4	557.3	592243
Lithuania	2021	LT21	NW278	NW278_A	1	1	11	24	65	74	101	590.8	32	14.5	70.7	575.35	621474
Lithuania	2021	LT21	NW278	NW278_B	2	2	8	49	65	77.7	101	669	33	14.4	71	575.35	621474
Lithuania	2021	LT21	NW279	NW279_A	1	1	10	24	66	81.7	101	605	28	13.9	75.8	592.8	650674
Lithuania	2021	LT21	NW279	NW279_B	2	2	9	49	66	82	101	585.7	30	12.7	75.8	592.8	650674
Lithuania	2021	LT21	NW280	NW280_A	1	1	9	24	64	80.7	101	478.2	30	13.8	75.8	557.3	592243
Lithuania	2021	LT21	NW280	NW280_B	2	2	10	49	64	78.3	101	607.6	30	13	76.4	557.3	592243
Lithuania	2021	LT21	NW281	NW281_A	1	1	8	24	66	75	101	489	30	13.3	75.7	592.8	650674
Lithuania	2021	LT21	NW281	NW281_B	2	2	11	49	65	83.3	101	540.4	27	13.9	75.2	575.35	621474
Lithuania	2021	LT21	NW282	NW282_A	1	1	7	24	64	77.3	101	533.3	30	13.6	75.7	557.3	592243
Lithuania	2021	LT21	NW282	NW282_B	2	2	12	49	65	81.3	101	524.3	29	13.8	75.1	575.35	621474
Lithuania	2021	LT21	NW283	NW283_A	1	1	6	24	66	81.3	101	572.8	30	13.8	72	592.8	650674
Lithuania	2021	LT21	NW283	NW283_B	2	2	12	50	66	80	101	514.6	27	13.9	73.8	592.8	650674
Lithuania	2021	LT21	NW284	NW284_A	1	1	5	24	64	90.3	101	749.8	35	13.6	75.8	557.3	592243
Lithuania	2021	LT21	NW284	NW284_B	2	2	11	50	64	79.7	101	643.9	35	13.1	77.9	557.3	592243
Lithuania	2021	LT21	NW285	NW285_A	1	1	4	24	68	75.3	101	609.6	33	15	75	625.3	708170
Lithuania	2021	LT21	NW285	NW285_B	2	2	10	50	67	63	101	541.9	31	14.2	77.2	609.05	679142
Lithuania	2021	LT21	NW286	NW286_A	1	1	3	24	65	81.3	101	761	43	13.9	73.5	575.35	621474
Lithuania	2021	LT21	NW286	NW286_B	2	2	9	50	66	73.7	101	594.4	36	13.4	73.6	592.8	650674
Lithuania	2021	LT21	NW287	NW287_A	1	1	2	24	NA	NA	NA	NA	NA	NA	NA	NA	NA
Lithuania	2021	LT21	NW287	NW287_B	2	2	8	50	68	79.7	101	519.2	34	14.8	72.9	625.3	708170
Lithuania	2021	LT21	NW288	NW288_A	1	1	1	24	NA	NA	NA	NA	NA	NA	NA	NA	NA
Lithuania	2021	LT21	NW288	NW288_B	2	2	7	50	69	75.3	102	457	32	15	71.5	640.55	736608
Lithuania	2021	LT21	NW289	NW289_A	1	1	1	25	66	80	101	558.5	28	14.5	74	592.8	650674
Lithuania	2021	LT21	NW289	NW289_B	2	2	6	50	67	68	101	513.3	28	13.9	75.5	609.05	679142
Lithuania	2021	LT21	NW290	NW290_A	1	1	2	25	65	90	101	745.1	28	13.3	75.1	575.35	621474
Lithuania	2021	LT21	NW290	NW290_B	2	2	5	50	65	82.7	101	666.7	27	13.9	75.2	575.35	621474
Lithuania	2021	LT21	NW291	NW291_A	1	1	3	25	67	86.7	101	657.2	32	14.3	74.2	609.05	679142
Lithuania	2021	LT21	NW291	NW291_B	2	2	4	50	67	81	101	715	30	14.1	74.3	609.05	679142
Lithuania	2021	LT21	NW292	NW292_A	1	1	4	25	67	100.3	101	586.2	29	14.9	71.1	609.05	679142
Lithuania	2021	LT21	NW292	NW292_B	2	2	3	50	66	94	101	608.8	30	14	73	592.8	650674
Lithuania	2021	LT21	NW293	NW293_A	1	1	5	25	67	102	101	597	30	14.7	72	609.05	679142
Lithuania	2021	LT21	NW293	NW293_B	2	2	2	50	67	95.3	101	644.4	29	14.3	72.2	609.05	679142
Lithuania	2021	LT21	NW294	NW294_A	1	1	6	25	65	81.3	101	516.6	29	13.4	75.8	575.35	621474
Lithuania	2021	LT21	NW294	NW294_B	2	2	1	50	65	82.7	101	662.8	28	13.1	74.5	575.35	621474
Lithuania	2021	LT21	NW295	NW295_A	1	1	7	25	65	75	101	455.1	30	13.8	75.6	575.35	621474
Lithuania	2021	LT21	NW295	NW295_B	2	2	1	51	65	83	101	679.1	27	13.9	74.9	575.35	621474
Lithuania	2021	LT21	NW296	NW296_A	1	1	8	25	65	80	101	430.3	29	13.6	74.6	575.35	621474
Lithuania	2021	LT21	NW296	NW296_B	2	2	2	51	64	87.3	101	671.3	26	14.2	73.9	557.3	592243
Lithuania	2021	LT21	NW297	NW297_A	1	1	9	25	66	77	101	455.4	27	13.9	74.2	592.8	650674
Lithuania	2021	LT21	NW297	NW297_B	2	2	3	51	66	78.7	101	560	26	13.4	75	592.8	650674
Lithuania	2021	LT21	NW298	NW298_A	1	1	10	25	66	83	101	589.5	28	14	74.3	592.8	650674
Lithuania	2021	LT21	NW298	NW298_B	2	2	4	51	65	80.7	101	693.9	27	13.8	74.6	575.35	621474
Lithuania	2021	LT21	NW299	NW299_A	1	1	11	25	71	79	103	236.1	29	16.2	68.9	671.95	796118
Lithuania	2021	LT21	NW299	NW299_B	2	2	5	51	69	93.3	101	507.4	29	14.7	70.8	640.55	736608
Lithuania	2021	LT21	NW300	NW300_A	1	1	12	25	68	98	101	566.3	30	13.7	73.5	625.3	708170
Lithuania	2021	LT21	NW300	NW300_B	2	2	6	51	68	94.3	101	656.2	29	14.1	75.5	625.3	708170
Lithuania	2022	LT22	NW001	NW001_GEN300_R1	1	1	1	1	67	88	115	458.1	37.4	12.7	78.6	517.7	569802
Lithuania	2022	LT22	NW001	NW001_GEN300_R2	2	2	7	8	69	92	115	351.1	38.3	12.1	79.4	556.05	631406
Lithuania	2022	LT22	NW002	NW002_GEN300_R1	1	1	2	1	66	91.7	115	486.1	31.1	12.2	76.6	499.3	540835
Lithuania	2022	LT22	NW002	NW002_GEN300_R2	2	2	5	12	68	88.3	115	437.3	31.2	11.7	79	536.65	600021
Lithuania	2022	LT22	NW003	NW003_GEN300_R1	1	1	3	1	66	73	115	445.1	33.3	12.1	76.9	499.3	540835
Lithuania	2022	LT22	NW003	NW003_GEN300_R2	2	2	12	4	66	81.7	115	523.6	35.1	11.9	78.3	499.3	540835
Lithuania	2022	LT22	NW004	NW004_GEN300_R1	1	1	4	1	66	100	115	404.2	37.3	10.9	80.2	499.3	540835
Lithuania	2022	LT22	NW004	NW004_GEN300_R2	2	2	5	8	68	102.7	115	460.7	36.8	11	81.5	536.65	600021
Lithuania	2022	LT22	NW005	NW005_GEN300_R1	1	1	5	1	66	81	115	282.6	30.4	11.5	77	499.3	540835
Lithuania	2022	LT22	NW005	NW005_GEN300_R2	2	2	5	2	66	87.7	115	472.9	31.3	13.4	78.7	499.3	540835
Lithuania	2022	LT22	NW006	NW006_GEN300_R1	1	1	6	1	67	NA	NA	NA	NA	NA	NA	517.7	569802
Lithuania	2022	LT22	NW006	NW006_GEN300_R2	2	2	14	15	66	84	115	329.7	38	11.1	80.3	499.3	540835
Lithuania	2022	LT22	NW007	NW007_GEN300_R1	1	1	7	1	65	NA	NA	NA	NA	NA	NA	482.55	514266
Lithuania	2022	LT22	NW007	NW007_GEN300_R2	2	2	15	13	66	84	115	293.3	34	11.2	82	499.3	540835
Lithuania	2022	LT22	NW008	NW008_GEN300_R1	1	1	8	1	68	NA	NA	NA	NA	NA	NA	536.65	600021
Lithuania	2022	LT22	NW008	NW008_GEN300_R2	2	2	8	14	68	85.7	115	405.1	34.5	14	79	536.65	600021
Lithuania	2022	LT22	NW009	NW009_GEN300_R1	1	1	9	1	69	87.3	115	321.9	34.1	11.7	81.2	556.05	631406
Lithuania	2022	LT22	NW009	NW009_GEN300_R2	2	2	3	2	68	106.7	115	389.8	38.5	12.4	81.8	536.65	600021
Lithuania	2022	LT22	NW010	NW010_GEN300_R1	1	1	10	1	68	90.7	115	403.3	30.9	10.9	76.7	536.65	600021
Lithuania	2022	LT22	NW010	NW010_GEN300_R2	2	2	3	12	70	100	115	484.5	36.1	12.6	79.7	574.4	662249
Lithuania	2022	LT22	NW011	NW011_GEN300_R1	1	1	11	1	69	NA	NA	NA	NA	NA	NA	556.05	631406
Lithuania	2022	LT22	NW011	NW011_GEN300_R2	2	2	13	13	68	79.7	115	418.6	32.5	12.2	80.6	536.65	600021
Lithuania	2022	LT22	NW012	NW012_GEN300_R1	1	1	12	1	65	NA	NA	NA	NA	NA	NA	482.55	514266
Lithuania	2022	LT22	NW012	NW012_GEN300_R2	2	2	2	13	66	97	115	432.1	41.5	12.6	78.5	499.3	540835
Lithuania	2022	LT22	NW013	NW013_GEN300_R1	1	1	13	1	66	NA	NA	NA	NA	NA	NA	499.3	540835
Lithuania	2022	LT22	NW013	NW013_GEN300_R2	2	2	1	13	66	91.7	115	431.6	41.8	12.1	81.9	499.3	540835
Lithuania	2022	LT22	NW014	NW014_GEN300_R1	1	1	14	1	66	NA	NA	NA	NA	NA	NA	499.3	540835
Lithuania	2022	LT22	NW014	NW014_GEN300_R2	2	2	2	2	68	93.7	115	423.4	39.8	13.4	83.3	536.65	600021
Lithuania	2022	LT22	NW015	NW015_GEN300_R1	1	1	15	1	70	NA	NA	NA	NA	NA	NA	574.4	662249
Lithuania	2022	LT22	NW015	NW015_GEN300_R2	2	2	1	2	69	82	115	417.7	30.4	11.2	79.8	556.05	631406
Lithuania	2022	LT22	NW016	NW016_GEN300_R1	1	1	16	1	66	NA	NA	NA	NA	NA	NA	499.3	540835
Lithuania	2022	LT22	NW016	NW016_GEN300_R2	2	2	5	14	66	82.7	115	337.1	29.4	14.7	77.2	499.3	540835
Lithuania	2022	LT22	NW017	NW017_GEN300_R1	1	1	17	1	66	NA	NA	NA	NA	NA	NA	499.3	540835
Lithuania	2022	LT22	NW017	NW017_GEN300_R2	2	2	8	5	66	87.7	115	311.4	33.5	13.4	74.6	499.3	540835
Lithuania	2022	LT22	NW018	NW018_GEN300_R1	1	1	18	1	66	NA	NA	NA	NA	NA	NA	499.3	540835
Lithuania	2022	LT22	NW018	NW018_GEN300_R2	2	2	19	4	69	87	115	406.5	28.1	12.2	78.6	556.05	631406
Lithuania	2022	LT22	NW019	NW019_GEN300_R1	1	1	19	1	67	76.7	115	340.7	40.2	12	80.8	517.7	569802
Lithuania	2022	LT22	NW019	NW019_GEN300_R2	2	2	11	9	68	79	115	351.5	40.8	12.1	81	536.65	600021
Lithuania	2022	LT22	NW020	NW020_GEN300_R1	1	1	20	1	66	84.7	115	379	41.8	14.2	81	499.3	540835
Lithuania	2022	LT22	NW020	NW020_GEN300_R2	2	2	11	10	68	82.3	115	270.1	40.1	14.7	80.2	536.65	600021
Lithuania	2022	LT22	NW021	NW021_GEN300_R1	1	1	1	2	66	94.3	115	512	41.6	11.9	82.3	499.3	540835
Lithuania	2022	LT22	NW021	NW021_GEN300_R2	2	2	4	7	66	97	115	338.4	40	12.8	82.5	499.3	540835
Lithuania	2022	LT22	NW022	NW022_GEN300_R1	1	1	2	2	65	98.3	115	578.7	40.1	11	80.4	482.55	514266
Lithuania	2022	LT22	NW022	NW022_GEN300_R2	2	2	2	12	65	99.3	115	530.6	39.5	10.8	81.2	482.55	514266
Lithuania	2022	LT22	NW023	NW023_GEN300_R1	1	1	3	2	66	85.3	115	483.9	30.1	12.3	80.9	499.3	540835
Lithuania	2022	LT22	NW023	NW023_GEN300_R2	2	2	1	12	69	81.3	115	417.7	27.3	12.5	80.4	556.05	631406
Lithuania	2022	LT22	NW024	NW024_GEN300_R1	1	1	4	2	68	78	115	458.1	31	11.5	78.6	536.65	600021
Lithuania	2022	LT22	NW024	NW024_GEN300_R2	2	2	4	3	67	89.3	115	494.6	31.9	12.6	79.1	517.7	569802
Lithuania	2022	LT22	NW025	NW025_GEN300_R1	1	1	5	2	66	86	115	456.5	34.6	10	80.3	499.3	540835
Lithuania	2022	LT22	NW025	NW025_GEN300_R2	2	2	13	7	69	82.7	115	472.4	31.4	11.6	79.5	556.05	631406
Lithuania	2022	LT22	NW026	NW026_GEN300_R1	1	1	6	2	67	80	115	401.9	33.3	10.9	79.1	517.7	569802
Lithuania	2022	LT22	NW026	NW026_GEN300_R2	2	2	4	10	68	83.7	115	432.1	31.6	11.9	79.1	536.65	600021
Lithuania	2022	LT22	NW027	NW027_GEN300_R1	1	1	7	2	67	85.7	115	430.1	34.2	10.5	79.4	517.7	569802
Lithuania	2022	LT22	NW027	NW027_GEN300_R2	2	2	9	4	68	89.3	115	464	36	12.2	82.3	536.65	600021
Lithuania	2022	LT22	NW028	NW028_GEN300_R1	1	1	8	2	68	93	115	444.6	32.5	10.9	79	536.65	600021
Lithuania	2022	LT22	NW028	NW028_GEN300_R2	2	2	10	12	66	99.7	115	595.5	35	11.8	79.5	499.3	540835
Lithuania	2022	LT22	NW029	NW029_GEN300_R1	1	1	9	2	68	92	115	524.2	32.6	11.2	78.4	536.65	600021
Lithuania	2022	LT22	NW029	NW029_GEN300_R2	2	2	20	15	69	94	115	513.1	34	11.4	81.2	556.05	631406
Lithuania	2022	LT22	NW030	NW030_GEN300_R1	1	1	10	2	69	97.3	115	538.3	39.3	11.8	80.9	556.05	631406
Lithuania	2022	LT22	NW030	NW030_GEN300_R2	2	2	18	15	68	101	115	488.4	40.7	12.3	81.8	536.65	600021
Lithuania	2022	LT22	NW031	NW031_GEN300_R1	1	1	11	2	68	85	115	416.7	32.1	12.9	79.3	536.65	600021
Lithuania	2022	LT22	NW031	NW031_GEN300_R2	2	2	6	1	68	90.7	115	431.1	38.4	13.7	82.2	536.65	600021
Lithuania	2022	LT22	NW032	NW032_GEN300_R1	1	1	12	2	69	NA	NA	NA	NA	NA	NA	556.05	631406
Lithuania	2022	LT22	NW032	NW032_GEN300_R2	2	2	4	8	67	84.3	115	430.2	39.8	13	79.9	517.7	569802
Lithuania	2022	LT22	NW033	NW033_GEN300_R1	1	1	13	2	65	97.7	115	323.7	26.8	11.3	75.7	482.55	514266
Lithuania	2022	LT22	NW033	NW033_GEN300_R2	2	2	18	10	66	114.3	115	446	36.9	13.4	81.2	499.3	540835
Lithuania	2022	LT22	NW034	NW034_GEN300_R1	1	1	14	2	68	73.3	115	358.7	24.8	11.2	74.9	536.65	600021
Lithuania	2022	LT22	NW034	NW034_GEN300_R2	2	2	15	3	66	87.7	115	456.9	34.3	12.5	79.9	499.3	540835
Lithuania	2022	LT22	NW035	NW035_GEN300_R1	1	1	15	2	68	81	115	433.1	30.9	12.8	76.2	536.65	600021
Lithuania	2022	LT22	NW035	NW035_GEN300_R2	2	2	9	1	66	83.7	115	498.5	35.5	13.4	79.5	499.3	540835
Lithuania	2022	LT22	NW036	NW036_GEN300_R1	1	1	16	2	69	105	115	500.8	25	13.7	77.6	556.05	631406
Lithuania	2022	LT22	NW036	NW036_GEN300_R2	2	2	20	1	69	108	115	451.1	26.9	13.1	80.1	556.05	631406
Lithuania	2022	LT22	NW037	NW037_GEN300_R1	1	1	17	2	69	110	115	419.5	25	14.1	77.3	556.05	631406
Lithuania	2022	LT22	NW037	NW037_GEN300_R2	2	2	20	2	69	104.7	115	422.3	27.1	14	80.5	556.05	631406
Lithuania	2022	LT22	NW038	NW038_GEN300_R1	1	1	18	2	68	100.7	115	584	34.7	11.8	78.1	536.65	600021
Lithuania	2022	LT22	NW038	NW038_GEN300_R2	2	2	8	1	67	94.7	115	404.3	36	10.3	78.2	517.7	569802
Lithuania	2022	LT22	NW039	NW039_GEN300_R1	1	1	19	2	65	101.3	115	364.5	28.3	14	74	482.55	514266
Lithuania	2022	LT22	NW039	NW039_GEN300_R2	2	2	13	6	66	101	115	298.9	30.5	14.1	74.5	499.3	540835
Lithuania	2022	LT22	NW040	NW040_GEN300_R1	1	1	20	2	65	106.7	115	487.8	32.4	13.4	78.6	482.55	514266
Lithuania	2022	LT22	NW040	NW040_GEN300_R2	2	2	20	7	66	107.7	115	307.3	32.9	15.1	77.7	499.3	540835
Lithuania	2022	LT22	NW041	NW041_GEN300_R1	1	1	1	3	68	92.3	115	592.1	38.8	12.2	82.4	536.65	600021
Lithuania	2022	LT22	NW041	NW041_GEN300_R2	2	2	10	6	67	93.3	115	446.5	39.8	12.2	83.8	517.7	569802
Lithuania	2022	LT22	NW042	NW042_GEN300_R1	1	1	2	3	67	104.7	115	499.1	33.6	12.9	80	517.7	569802
Lithuania	2022	LT22	NW042	NW042_GEN300_R2	2	2	17	10	66	107.3	115	505.7	39.9	12.7	82.5	499.3	540835
Lithuania	2022	LT22	NW043	NW043_GEN300_R1	1	1	3	3	68	117.7	115	378.1	27	14	75	536.65	600021
Lithuania	2022	LT22	NW043	NW043_GEN300_R2	2	2	19	3	69	119	115	359.9	31.4	12.9	78.7	556.05	631406
Lithuania	2022	LT22	NW044	NW044_GEN300_R1	1	1	4	3	65	110.7	115	391.6	31.9	12.5	77.3	482.55	514266
Lithuania	2022	LT22	NW044	NW044_GEN300_R2	2	2	17	3	65	105.3	115	307	34.5	11.9	77.6	482.55	514266
Lithuania	2022	LT22	NW045	NW045_GEN300_R1	1	1	5	3	65	100.3	115	308.4	30.2	12.9	78.5	482.55	514266
Lithuania	2022	LT22	NW045	NW045_GEN300_R2	2	2	11	13	65	106	115	333.8	35.9	15	80.5	482.55	514266
Lithuania	2022	LT22	NW046	NW046_GEN300_R1	1	1	6	3	66	91.7	115	335.7	27.8	10.9	76.5	499.3	540835
Lithuania	2022	LT22	NW046	NW046_GEN300_R2	2	2	10	7	68	107.3	115	531.4	31.4	11.8	78.3	536.65	600021
Lithuania	2022	LT22	NW047	NW047_GEN300_R1	1	1	7	3	67	NA	NA	NA	NA	NA	NA	517.7	569802
Lithuania	2022	LT22	NW047	NW047_GEN300_R2	2	2	18	4	69	73.3	115	380.7	29	12.2	76.8	556.05	631406
Lithuania	2022	LT22	NW048	NW048_GEN300_R1	1	1	8	3	68	87.7	115	472.1	26.1	11.4	78.1	536.65	600021
Lithuania	2022	LT22	NW048	NW048_GEN300_R2	2	2	20	13	68	97.3	115	499	31.7	13	80.4	536.65	600021
Lithuania	2022	LT22	NW049	NW049_GEN300_R1	1	1	9	3	67	75.3	115	445.6	28.2	12.3	78.4	517.7	569802
Lithuania	2022	LT22	NW049	NW049_GEN300_R2	2	2	12	11	68	80	115	582	33.7	13.6	82.1	536.65	600021
Lithuania	2022	LT22	NW050	NW050_GEN300_R1	1	1	10	3	66	89.3	115	538.9	30.3	11.2	77.7	499.3	540835
Lithuania	2022	LT22	NW050	NW050_GEN300_R2	2	2	18	1	66	92	115	637.6	35.4	11.5	80	499.3	540835
Lithuania	2022	LT22	NW051	NW051_GEN300_R1	1	1	11	3	68	90	115	594.2	32.6	10.8	78.8	536.65	600021
Lithuania	2022	LT22	NW051	NW051_GEN300_R2	2	2	3	15	66	93.3	115	590	38.5	11.3	81.3	499.3	540835
Lithuania	2022	LT22	NW052	NW052_GEN300_R1	1	1	12	3	66	92.7	115	430.1	32.7	11	78.2	499.3	540835
Lithuania	2022	LT22	NW052	NW052_GEN300_R2	2	2	13	2	65	98	115	565.2	39.1	10.9	79	482.55	514266
Lithuania	2022	LT22	NW053	NW053_GEN300_R1	1	1	13	3	67	92	115	365.4	26.4	12.4	76	517.7	569802
Lithuania	2022	LT22	NW053	NW053_GEN300_R2	2	2	3	1	66	107	115	406.5	32.1	13.9	77.8	499.3	540835
Lithuania	2022	LT22	NW054	NW054_GEN300_R1	1	1	14	3	66	88.3	115	297.4	45.4	11.8	80	499.3	540835
Lithuania	2022	LT22	NW054	NW054_GEN300_R2	2	2	13	5	67	87	115	219.8	49.8	12	80.9	517.7	569802
Lithuania	2022	LT22	NW055	NW055_GEN300_R1	1	1	15	3	71	105.3	116	458.6	36.6	12.6	78.9	593	694015
Lithuania	2022	LT22	NW055	NW055_GEN300_R2	2	2	14	13	69	105	115	426.5	42	11.9	81.2	556.05	631406
Lithuania	2022	LT22	NW056	NW056_GEN300_R1	1	1	16	3	68	110	115	474.8	32.7	12.8	79.6	536.65	600021
Lithuania	2022	LT22	NW056	NW056_GEN300_R2	2	2	16	9	68	107.7	115	364.4	33	11.9	81.1	536.65	600021
Lithuania	2022	LT22	NW057	NW057_GEN300_R1	1	1	17	3	67	103.3	115	689.9	34.4	11.5	81.3	517.7	569802
Lithuania	2022	LT22	NW057	NW057_GEN300_R2	2	2	19	14	68	102.3	115	641.1	34.3	10.5	81.3	536.65	600021
Lithuania	2022	LT22	NW058	NW058_GEN300_R1	1	1	18	3	66	83.7	115	542	33.8	13	81.4	499.3	540835
Lithuania	2022	LT22	NW058	NW058_GEN300_R2	2	2	19	15	67	84.3	115	554.1	34.6	11.8	82.6	517.7	569802
Lithuania	2022	LT22	NW059	NW059_GEN300_R1	1	1	19	3	66	97	115	474.8	33.2	12.1	77.9	499.3	540835
Lithuania	2022	LT22	NW059	NW059_GEN300_R2	2	2	13	8	66	99.7	115	433.6	33.5	12.2	78.2	499.3	540835
Lithuania	2022	LT22	NW060	NW060_GEN300_R1	1	1	20	3	66	83	115	510.4	31.9	11.3	80.3	499.3	540835
Lithuania	2022	LT22	NW060	NW060_GEN300_R2	2	2	3	4	67	82	115	390.7	31.7	11.7	80	517.7	569802
Lithuania	2022	LT22	NW061	NW061_GEN300_R1	1	1	1	4	66	90.3	115	510.2	34.2	12.1	80	499.3	540835
Lithuania	2022	LT22	NW061	NW061_GEN300_R2	2	2	6	15	66	94.7	115	497.9	34.8	11.3	80.1	499.3	540835
Lithuania	2022	LT22	NW062	NW062_GEN300_R1	1	1	2	4	66	90	115	496.8	31.5	12.7	79.7	499.3	540835
Lithuania	2022	LT22	NW062	NW062_GEN300_R2	2	2	11	3	66	92	115	472.6	34.9	11.3	81.4	499.3	540835
Lithuania	2022	LT22	NW063	NW063_GEN300_R1	1	1	3	4	67	90.7	115	471	30.9	11.9	77.9	517.7	569802
Lithuania	2022	LT22	NW063	NW063_GEN300_R2	2	2	3	7	66	87.3	115	432.6	37.4	11	79.9	499.3	540835
Lithuania	2022	LT22	NW064	NW064_GEN300_R1	1	1	4	4	66	NA	NA	NA	NA	NA	NA	499.3	540835
Lithuania	2022	LT22	NW064	NW064_GEN300_R2	2	2	7	7	66	92.7	115	502.3	35.7	13	79.3	499.3	540835
Lithuania	2022	LT22	NW065	NW065_GEN300_R1	1	1	5	4	67	NA	NA	NA	NA	NA	NA	517.7	569802
Lithuania	2022	LT22	NW065	NW065_GEN300_R2	2	2	9	15	67	96	115	493.6	38.1	12.9	82.3	517.7	569802
Lithuania	2022	LT22	NW066	NW066_GEN300_R1	1	1	6	4	65	NA	NA	NA	NA	NA	NA	482.55	514266
Lithuania	2022	LT22	NW066	NW066_GEN300_R2	2	2	16	11	66	83	115	306.6	35.7	12.7	78.1	499.3	540835
Lithuania	2022	LT22	NW067	NW067_GEN300_R1	1	1	7	4	65	NA	NA	NA	NA	NA	NA	482.55	514266
Lithuania	2022	LT22	NW067	NW067_GEN300_R2	2	2	2	6	65	93.3	115	501.4	37.5	12.6	75.4	482.55	514266
Lithuania	2022	LT22	NW068	NW068_GEN300_R1	1	1	8	4	71	NA	NA	NA	NA	NA	NA	593	694015
Lithuania	2022	LT22	NW068	NW068_GEN300_R2	2	2	1	6	69	89	115	331.2	39.9	10.9	80.4	556.05	631406
Lithuania	2022	LT22	NW069	NW069_GEN300_R1	1	1	9	4	68	NA	NA	NA	NA	NA	NA	536.65	600021
Lithuania	2022	LT22	NW069	NW069_GEN300_R2	2	2	9	14	67	97.7	115	567.2	42.2	10.9	79.1	517.7	569802
Lithuania	2022	LT22	NW070	NW070_GEN300_R1	1	1	10	4	68	NA	NA	NA	NA	NA	NA	536.65	600021
Lithuania	2022	LT22	NW070	NW070_GEN300_R2	2	2	9	12	68	88.3	115	500.2	36.5	10.7	79.1	536.65	600021
Lithuania	2022	LT22	NW071	NW071_GEN300_R1	1	1	11	4	69	74.3	116	483.9	41.2	11	79.5	556.05	631406
Lithuania	2022	LT22	NW071	NW071_GEN300_R2	2	2	18	14	68	88	116	626.5	44.3	11	80.2	536.65	600021
Lithuania	2022	LT22	NW072	NW072_GEN300_R1	1	1	12	4	69	88	115	443.6	33.6	11.7	79.5	556.05	631406
Lithuania	2022	LT22	NW072	NW072_GEN300_R2	2	2	13	14	68	99	115	618.7	36.6	12.3	80.7	536.65	600021
Lithuania	2022	LT22	NW073	NW073_GEN300_R1	1	1	13	4	68	83	115	416.4	28	10.5	77.4	536.65	600021
Lithuania	2022	LT22	NW073	NW073_GEN300_R2	2	2	3	3	67	90	115	486.7	36.2	10.8	80.2	517.7	569802
Lithuania	2022	LT22	NW074	NW074_GEN300_R1	1	1	14	4	66	85	115	514.3	37.1	10.5	79.9	499.3	540835
Lithuania	2022	LT22	NW074	NW074_GEN300_R2	2	2	20	9	67	84.3	115	585.4	40.1	11.6	81.5	517.7	569802
Lithuania	2022	LT22	NW075	NW075_GEN300_R1	1	1	15	4	69	91.7	116	690.3	41.2	11.5	80.6	556.05	631406
Lithuania	2022	LT22	NW075	NW075_GEN300_R2	2	2	16	14	69	88	116	598	40.7	11.2	81.7	556.05	631406
Lithuania	2022	LT22	NW076	NW076_GEN300_R1	1	1	16	4	70	111.3	116	728.4	34.3	12	79.6	574.4	662249
Lithuania	2022	LT22	NW076	NW076_GEN300_R2	2	2	20	5	70	109.7	116	628.6	38.2	10.8	80.5	574.4	662249
Lithuania	2022	LT22	NW077	NW077_GEN300_R1	1	1	17	4	68	99.3	116	676.9	40.7	11.9	82.5	536.65	600021
Lithuania	2022	LT22	NW077	NW077_GEN300_R2	2	2	18	12	70	93	116	640.4	38.5	11.1	82.9	574.4	662249
Lithuania	2022	LT22	NW078	NW078_GEN300_R1	1	1	18	4	66	98	115	575.8	31	13.7	78.7	499.3	540835
Lithuania	2022	LT22	NW078	NW078_GEN300_R2	2	2	12	3	66	94.7	115	577.8	38.2	11.1	78.9	499.3	540835
Lithuania	2022	LT22	NW079	NW079_GEN300_R1	1	1	19	4	66	107.7	115	434.1	39.3	11	78.2	499.3	540835
Lithuania	2022	LT22	NW079	NW079_GEN300_R2	2	2	20	6	66	104.7	115	559.4	36.3	11.8	77.8	499.3	540835
Lithuania	2022	LT22	NW080	NW080_GEN300_R1	1	1	20	4	67	96.3	115	490	34.1	11.4	77.5	517.7	569802
Lithuania	2022	LT22	NW080	NW080_GEN300_R2	2	2	16	6	67	100	115	433.5	34.7	11.3	77.6	517.7	569802
Lithuania	2022	LT22	NW081	NW081_GEN300_R1	1	1	1	5	68	97.3	115	589.4	39.5	10.4	79.5	536.65	600021
Lithuania	2022	LT22	NW081	NW081_GEN300_R2	2	2	7	2	66	109.3	115	458.1	40.2	12.2	79.9	499.3	540835
Lithuania	2022	LT22	NW082	NW082_GEN300_R1	1	1	2	5	68	93	115	459.1	33.7	11	76.9	536.65	600021
Lithuania	2022	LT22	NW082	NW082_GEN300_R2	2	2	13	4	67	97.7	115	673.6	43.2	12	81	517.7	569802
Lithuania	2022	LT22	NW083	NW083_GEN300_R1	1	1	3	5	67	85.7	115	417.2	30.6	11.4	75.2	517.7	569802
Lithuania	2022	LT22	NW083	NW083_GEN300_R2	2	2	16	15	66	94.7	115	644.7	43.4	11.8	83	499.3	540835
Lithuania	2022	LT22	NW084	NW084_GEN300_R1	1	1	4	5	66	NA	NA	NA	NA	NA	NA	499.3	540835
Lithuania	2022	LT22	NW084	NW084_GEN300_R2	2	2	5	7	67	101	115	588	39.3	11.9	81.9	517.7	569802
Lithuania	2022	LT22	NW085	NW085_GEN300_R1	1	1	5	5	70	NA	NA	NA	NA	NA	NA	574.4	662249
Lithuania	2022	LT22	NW085	NW085_GEN300_R2	2	2	6	10	70	96.3	116	676.7	45.5	11	81.3	574.4	662249
Lithuania	2022	LT22	NW086	NW086_GEN300_R1	1	1	6	5	66	NA	NA	NA	NA	NA	NA	499.3	540835
Lithuania	2022	LT22	NW086	NW086_GEN300_R2	2	2	5	11	67	85.7	115	498.5	35.3	10.8	79.7	517.7	569802
Lithuania	2022	LT22	NW087	NW087_GEN300_R1	1	1	7	5	68	NA	NA	NA	NA	NA	NA	536.65	600021
Lithuania	2022	LT22	NW087	NW087_GEN300_R2	2	2	8	15	69	97.7	115	406	31.4	11.4	78.4	556.05	631406
Lithuania	2022	LT22	NW088	NW088_GEN300_R1	1	1	8	5	66	NA	NA	NA	NA	NA	NA	499.3	540835
Lithuania	2022	LT22	NW088	NW088_GEN300_R2	2	2	7	13	65	116.7	115	338	35.1	12.9	79.6	482.55	514266
Lithuania	2022	LT22	NW089	NW089_GEN300_R1	1	1	9	5	68	NA	NA	NA	NA	NA	NA	536.65	600021
Lithuania	2022	LT22	NW089	NW089_GEN300_R2	2	2	1	15	66	92.7	115	405.6	30.2	11.3	77.9	499.3	540835
Lithuania	2022	LT22	NW090	NW090_GEN300_R1	1	1	10	5	70	NA	NA	NA	NA	NA	NA	574.4	662249
Lithuania	2022	LT22	NW090	NW090_GEN300_R2	2	2	8	9	68	111	115	445.1	36.2	13.3	80.9	536.65	600021
Lithuania	2022	LT22	NW091	NW091_GEN300_R1	1	1	11	5	73	NA	NA	NA	NA	NA	NA	630.8	760177
Lithuania	2022	LT22	NW091	NW091_GEN300_R2	2	2	9	7	70	86.7	116	457	38.5	9.8	80.1	574.4	662249
Lithuania	2022	LT22	NW092	NW092_GEN300_R1	1	1	12	5	67	NA	NA	NA	NA	NA	NA	517.7	569802
Lithuania	2022	LT22	NW092	NW092_GEN300_R2	2	2	16	2	65	103.3	115	366.3	35.9	12.7	80.2	482.55	514266
Lithuania	2022	LT22	NW093	NW093_GEN300_R1	1	1	13	5	69	78.3	115	459.4	32.5	10.6	77.4	556.05	631406
Lithuania	2022	LT22	NW093	NW093_GEN300_R2	2	2	18	7	68	92.7	115	611.9	39.2	11.8	80.5	536.65	600021
Lithuania	2022	LT22	NW094	NW094_GEN300_R1	1	1	14	5	68	104.3	115	472.6	34.8	10.4	80.2	536.65	600021
Lithuania	2022	LT22	NW094	NW094_GEN300_R2	2	2	15	15	68	105.7	115	479.5	37.7	12.5	81.9	536.65	600021
Lithuania	2022	LT22	NW095	NW095_GEN300_R1	1	1	15	5	67	77.3	115	492.7	30.3	12.3	78.1	517.7	569802
Lithuania	2022	LT22	NW095	NW095_GEN300_R2	2	2	6	5	66	79.3	115	434.5	32.3	11.7	79.6	499.3	540835
Lithuania	2022	LT22	NW096	NW096_GEN300_R1	1	1	16	5	70	95	115	621.9	35.1	11.7	80.3	574.4	662249
Lithuania	2022	LT22	NW096	NW096_GEN300_R2	2	2	14	8	69	97.3	115	499.6	36	11.3	79.9	556.05	631406
Lithuania	2022	LT22	NW097	NW097_GEN300_R1	1	1	17	5	69	96	115	598	39.4	12.1	77	556.05	631406
Lithuania	2022	LT22	NW097	NW097_GEN300_R2	2	2	16	8	67	86.7	115	527.3	41.5	10.5	78.6	517.7	569802
Lithuania	2022	LT22	NW098	NW098_GEN300_R1	1	1	18	5	69	99.3	115	754.5	38.8	10.6	81.1	556.05	631406
Lithuania	2022	LT22	NW098	NW098_GEN300_R2	2	2	13	3	68	93	115	604.2	39.7	10.7	81.6	536.65	600021
Lithuania	2022	LT22	NW099	NW099_GEN300_R1	1	1	19	5	67	93.3	115	584.7	38.4	10.8	74.4	517.7	569802
Lithuania	2022	LT22	NW099	NW099_GEN300_R2	2	2	7	15	66	94.7	115	489	37.4	11.3	74.5	499.3	540835
Lithuania	2022	LT22	NW100	NW100_GEN300_R1	1	1	20	5	66	98	115	567.8	38.5	10.8	79.5	499.3	540835
Lithuania	2022	LT22	NW100	NW100_GEN300_R2	2	2	10	13	68	99.7	115	499.1	36.7	11.4	81.3	536.65	600021
Lithuania	2022	LT22	NW101	NW101_GEN300_R1	1	1	1	6	70	103	115	524.2	34	11.1	78.3	574.4	662249
Lithuania	2022	LT22	NW101	NW101_GEN300_R2	2	2	2	1	71	104	115	525.8	32.8	12.5	79	593	694015
Lithuania	2022	LT22	NW102	NW102_GEN300_R1	1	1	2	6	70	89	115	389.8	28.1	12.5	75.9	574.4	662249
Lithuania	2022	LT22	NW102	NW102_GEN300_R2	2	2	1	1	67	91	115	445.1	32.6	12.7	75.7	517.7	569802
Lithuania	2022	LT22	NW103	NW103_GEN300_R1	1	1	3	6	67	93.3	115	443.6	28.7	11.3	78.8	517.7	569802
Lithuania	2022	LT22	NW103	NW103_GEN300_R2	2	2	7	3	65	102.7	115	378.1	31.6	11.5	79.7	482.55	514266
Lithuania	2022	LT22	NW104	NW104_GEN300_R1	1	1	4	6	68	NA	NA	NA	NA	NA	NA	536.65	600021
Lithuania	2022	LT22	NW104	NW104_GEN300_R2	2	2	19	7	66	84	115	561.2	44.6	11	82.2	499.3	540835
Lithuania	2022	LT22	NW105	NW105_GEN300_R1	1	1	5	6	67	NA	NA	NA	NA	NA	NA	517.7	569802
Lithuania	2022	LT22	NW105	NW105_GEN300_R2	2	2	2	14	66	97.3	115	498.7	35.1	12.6	78.9	499.3	540835
Lithuania	2022	LT22	NW106	NW106_GEN300_R1	1	1	6	6	66	NA	NA	NA	NA	NA	NA	499.3	540835
Lithuania	2022	LT22	NW106	NW106_GEN300_R2	2	2	1	14	66	99	115	459.1	37.2	13.5	82.4	499.3	540835
Lithuania	2022	LT22	NW107	NW107_GEN300_R1	1	1	7	6	66	NA	NA	NA	NA	NA	NA	499.3	540835
Lithuania	2022	LT22	NW107	NW107_GEN300_R2	2	2	7	6	66	87.7	115	363.8	34.9	11.8	78.9	499.3	540835
Lithuania	2022	LT22	NW108	NW108_GEN300_R1	1	1	8	6	68	NA	NA	NA	NA	NA	NA	536.65	600021
Lithuania	2022	LT22	NW108	NW108_GEN300_R2	2	2	14	1	66	95	115	451.1	35.5	12.2	79.7	499.3	540835
Lithuania	2022	LT22	NW109	NW109_GEN300_R1	1	1	9	6	68	NA	NA	NA	NA	NA	NA	536.65	600021
Lithuania	2022	LT22	NW109	NW109_GEN300_R2	2	2	11	12	68	102.3	115	461.2	31.2	12.4	79.5	536.65	600021
Lithuania	2022	LT22	NW110	NW110_GEN300_R1	1	1	10	6	69	NA	NA	NA	NA	NA	NA	556.05	631406
Lithuania	2022	LT22	NW110	NW110_GEN300_R2	2	2	6	11	67	100	115	432.6	35.4	11.1	78.4	517.7	569802
Lithuania	2022	LT22	NW111	NW111_GEN300_R1	1	1	11	6	68	NA	NA	NA	NA	NA	NA	536.65	600021
Lithuania	2022	LT22	NW111	NW111_GEN300_R2	2	2	15	14	67	90.3	115	504	34.8	11.5	81.7	517.7	569802
Lithuania	2022	LT22	NW112	NW112_GEN300_R1	1	1	12	6	71	NA	NA	NA	NA	NA	NA	593	694015
Lithuania	2022	LT22	NW112	NW112_GEN300_R2	2	2	9	5	66	98.7	115	473.7	33.8	11.1	79	499.3	540835
Lithuania	2022	LT22	NW113	NW113_GEN300_R1	1	1	13	6	67	92.7	115	364.2	30.3	11.4	76.5	517.7	569802
Lithuania	2022	LT22	NW113	NW113_GEN300_R2	2	2	18	5	67	98.3	115	404.7	39.6	13.3	79.8	517.7	569802
Lithuania	2022	LT22	NW114	NW114_GEN300_R1	1	1	14	6	66	97.7	115	351.5	30.5	11.8	77.9	499.3	540835
Lithuania	2022	LT22	NW114	NW114_GEN300_R2	2	2	8	3	65	101.3	115	431.1	35.9	12.6	80.1	482.55	514266
Lithuania	2022	LT22	NW115	NW115_GEN300_R1	1	1	15	6	66	93	115	514.9	31.7	11.3	75.7	499.3	540835
Lithuania	2022	LT22	NW115	NW115_GEN300_R2	2	2	6	3	65	97	115	486.7	34.8	12.3	76.8	482.55	514266
Lithuania	2022	LT22	NW116	NW116_GEN300_R1	1	1	16	6	68	100.3	115	482.4	32.2	13.6	77.9	536.65	600021
Lithuania	2022	LT22	NW116	NW116_GEN300_R2	2	2	20	3	66	100.7	115	500.7	33.1	13.8	78.4	499.3	540835
Lithuania	2022	LT22	NW117	NW117_GEN300_R1	1	1	17	6	68	98.3	115	484.6	33.5	11.4	80.8	536.65	600021
Lithuania	2022	LT22	NW117	NW117_GEN300_R2	2	2	3	5	66	100.3	115	473.7	34.2	12.1	80.2	499.3	540835
Lithuania	2022	LT22	NW118	NW118_GEN300_R1	1	1	18	6	67	103.7	115	514	34.2	13.1	76.3	517.7	569802
Lithuania	2022	LT22	NW118	NW118_GEN300_R2	2	2	10	2	66	102	115	420.5	34.1	12.8	76.4	499.3	540835
Lithuania	2022	LT22	NW119	NW119_GEN300_R1	1	1	19	6	65	102.3	115	503.1	38	10.7	79.8	482.55	514266
Lithuania	2022	LT22	NW119	NW119_GEN300_R2	2	2	19	8	65	97.3	115	476	37.6	11.8	80.7	482.55	514266
Lithuania	2022	LT22	NW120	NW120_GEN300_R1	1	1	20	6	66	91.7	115	514.9	40.2	11.8	78.1	499.3	540835
Lithuania	2022	LT22	NW120	NW120_GEN300_R2	2	2	4	11	68	88.7	115	460.2	35.5	12.6	78.5	536.65	600021
Lithuania	2022	LT22	NW121	NW121_GEN300_R1	1	1	1	7	66	99.7	115	524.2	34.1	12.5	79.2	499.3	540835
Lithuania	2022	LT22	NW121	NW121_GEN300_R2	2	2	15	12	66	92.7	115	335.6	31.1	11.8	80.2	499.3	540835
Lithuania	2022	LT22	NW122	NW122_GEN300_R1	1	1	2	7	66	92.3	115	444.6	30.2	13	75.9	499.3	540835
Lithuania	2022	LT22	NW122	NW122_GEN300_R2	2	2	10	11	66	90.3	115	360.3	30.1	11.8	77.7	499.3	540835
Lithuania	2022	LT22	NW123	NW123_GEN300_R1	1	1	3	7	69	91.7	115	471.6	30	10.9	75.4	556.05	631406
Lithuania	2022	LT22	NW123	NW123_GEN300_R2	2	2	13	10	68	97	115	569.8	33.6	11.1	78.3	536.65	600021
Lithuania	2022	LT22	NW124	NW124_GEN300_R1	1	1	4	7	69	87	115	377.2	28.8	11.3	75.1	556.05	631406
Lithuania	2022	LT22	NW124	NW124_GEN300_R2	2	2	11	11	69	93	115	433.2	33.3	11.1	79	556.05	631406
Lithuania	2022	LT22	NW125	NW125_GEN300_R1	1	1	5	7	68	NA	NA	NA	NA	NA	NA	536.65	600021
Lithuania	2022	LT22	NW125	NW125_GEN300_R2	2	2	7	12	66	96.7	115	337.6	34.8	10.7	79.9	499.3	540835
Lithuania	2022	LT22	NW126	NW126_GEN300_R1	1	1	6	7	68	NA	NA	NA	NA	NA	NA	536.65	600021
Lithuania	2022	LT22	NW126	NW126_GEN300_R2	2	2	11	15	68	98.3	115	434.1	34.3	12.3	79.6	536.65	600021
Lithuania	2022	LT22	NW127	NW127_GEN300_R1	1	1	7	7	69	NA	NA	NA	NA	NA	NA	556.05	631406
Lithuania	2022	LT22	NW127	NW127_GEN300_R2	2	2	17	8	67	99	115	419.5	35.9	11.8	79.3	517.7	569802
Lithuania	2022	LT22	NW128	NW128_GEN300_R1	1	1	8	7	68	NA	NA	NA	NA	NA	NA	536.65	600021
Lithuania	2022	LT22	NW128	NW128_GEN300_R2	2	2	13	11	68	91.3	115	503.1	32.2	11	78.2	536.65	600021
Lithuania	2022	LT22	NW129	NW129_GEN300_R1	1	1	9	7	69	NA	NA	NA	NA	NA	NA	556.05	631406
Lithuania	2022	LT22	NW129	NW129_GEN300_R2	2	2	10	10	69	92.7	115	477	30.1	11	78.3	556.05	631406
Lithuania	2022	LT22	NW130	NW130_GEN300_R1	1	1	10	7	69	92.7	115	499.1	30.6	11.7	76.8	556.05	631406
Lithuania	2022	LT22	NW130	NW130_GEN300_R2	2	2	6	13	68	96.7	115	539.5	33.7	11.6	80.4	536.65	600021
Lithuania	2022	LT22	NW131	NW131_GEN300_R1	1	1	11	7	70	87	115	471	30.5	11.6	77.4	574.4	662249
Lithuania	2022	LT22	NW131	NW131_GEN300_R2	2	2	10	15	68	100	115	477	34.8	12.6	80	536.65	600021
Lithuania	2022	LT22	NW132	NW132_GEN300_R1	1	1	12	7	66	92.3	115	457.6	35.8	10.5	79	499.3	540835
Lithuania	2022	LT22	NW132	NW132_GEN300_R2	2	2	14	14	66	95.3	115	501.9	39.1	11.7	81.7	499.3	540835
Lithuania	2022	LT22	NW133	NW133_GEN300_R1	1	1	13	7	67	79.7	115	337.6	30.4	10.9	80	517.7	569802
Lithuania	2022	LT22	NW133	NW133_GEN300_R2	2	2	6	9	68	86.7	115	403.7	32.8	11.1	81.2	536.65	600021
Lithuania	2022	LT22	NW134	NW134_GEN300_R1	1	1	14	7	70	89.7	115	404.7	32.6	10.8	79.8	574.4	662249
Lithuania	2022	LT22	NW134	NW134_GEN300_R2	2	2	10	9	70	100.3	115	527.9	34.6	11.4	82.1	574.4	662249
Lithuania	2022	LT22	NW135	NW135_GEN300_R1	1	1	15	7	68	89.7	115	527.9	28.7	12.4	76.3	536.65	600021
Lithuania	2022	LT22	NW135	NW135_GEN300_R2	2	2	5	3	66	94	115	447.2	34	12.7	80.1	499.3	540835
Lithuania	2022	LT22	NW136	NW136_GEN300_R1	1	1	16	7	69	88	115	490.5	32.7	11.4	79	556.05	631406
Lithuania	2022	LT22	NW136	NW136_GEN300_R2	2	2	6	4	66	92.3	115	514.9	38.4	12.6	80.5	499.3	540835
Lithuania	2022	LT22	NW137	NW137_GEN300_R1	1	1	17	7	71	97.7	115	496.5	32.7	11.1	79.2	593	694015
Lithuania	2022	LT22	NW137	NW137_GEN300_R2	2	2	11	4	69	100.7	115	497.6	37.5	11.6	80.4	556.05	631406
Lithuania	2022	LT22	NW138	NW138_GEN300_R1	1	1	18	7	71	83	115	461.2	33.7	10.2	78.8	593	694015
Lithuania	2022	LT22	NW138	NW138_GEN300_R2	2	2	5	6	70	89	115	529.1	39.5	12.2	81.7	574.4	662249
Lithuania	2022	LT22	NW139	NW139_GEN300_R1	1	1	19	7	69	86.3	115	405.6	33.9	9.4	77.6	556.05	631406
Lithuania	2022	LT22	NW139	NW139_GEN300_R2	2	2	15	7	67	90.7	115	555	41.1	10.6	81.1	517.7	569802
Lithuania	2022	LT22	NW140	NW140_GEN300_R1	1	1	20	7	68	98.3	115	485	33.6	10.1	79.2	536.65	600021
Lithuania	2022	LT22	NW140	NW140_GEN300_R2	2	2	11	6	67	102.7	115	456.3	37.3	10.9	80.7	517.7	569802
Lithuania	2022	LT22	NW141	NW141_GEN300_R1	1	1	1	8	69	108	116	523.6	35.7	10.8	80.1	556.05	631406
Lithuania	2022	LT22	NW141	NW141_GEN300_R2	2	2	17	2	70	107.7	116	378	35.1	12.5	78.7	574.4	662249
Lithuania	2022	LT22	NW142	NW142_GEN300_R1	1	1	2	8	71	87.3	116	565.9	32.8	11.8	75.6	593	694015
Lithuania	2022	LT22	NW142	NW142_GEN300_R2	2	2	17	15	71	92	116	641.9	39.5	11.6	79.6	593	694015
Lithuania	2022	LT22	NW143	NW143_GEN300_R1	1	1	3	8	71	99	116	538.3	31.6	11.1	78.3	593	694015
Lithuania	2022	LT22	NW143	NW143_GEN300_R2	2	2	3	11	71	101.7	116	539.5	34.2	11.8	79.9	593	694015
Lithuania	2022	LT22	NW144	NW144_GEN300_R1	1	1	4	8	70	93	115	483.3	37.1	10.3	77.7	574.4	662249
Lithuania	2022	LT22	NW144	NW144_GEN300_R2	2	2	7	1	67	103.7	115	606.3	42.4	11.8	79.5	517.7	569802
Lithuania	2022	LT22	NW145	NW145_GEN300_R1	1	1	5	8	66	NA	NA	NA	NA	NA	NA	499.3	540835
Lithuania	2022	LT22	NW145	NW145_GEN300_R2	2	2	4	9	69	78.7	115	404.2	30	10.1	78.7	556.05	631406
Lithuania	2022	LT22	NW146	NW146_GEN300_R1	1	1	6	8	67	NA	NA	NA	NA	NA	NA	517.7	569802
Lithuania	2022	LT22	NW146	NW146_GEN300_R2	2	2	15	1	67	92.7	115	464.6	39.1	11.6	80.6	517.7	569802
Lithuania	2022	LT22	NW147	NW147_GEN300_R1	1	1	7	8	66	81.3	115	430.1	34.8	10.8	77	499.3	540835
Lithuania	2022	LT22	NW147	NW147_GEN300_R2	2	2	4	5	66	89.7	115	488.9	44.2	11.7	82.1	499.3	540835
Lithuania	2022	LT22	NW148	NW148_GEN300_R1	1	1	8	8	70	124.7	115	430.6	41.1	11.5	80.6	574.4	662249
Lithuania	2022	LT22	NW148	NW148_GEN300_R2	2	2	11	14	68	131	115	445.6	44.6	13.9	80.6	536.65	600021
Lithuania	2022	LT22	NW149	NW149_GEN300_R1	1	1	9	8	70	100.3	115	512.6	30.3	11.4	77.7	574.4	662249
Lithuania	2022	LT22	NW149	NW149_GEN300_R2	2	2	13	15	70	109.7	115	554.3	38	13.6	80.3	574.4	662249
Lithuania	2022	LT22	NW150	NW150_GEN300_R1	1	1	10	8	67	92.7	115	524.2	41.2	10.7	77.2	517.7	569802
Lithuania	2022	LT22	NW150	NW150_GEN300_R2	2	2	9	2	66	96	115	500.2	46.5	10.9	79.6	499.3	540835
Lithuania	2022	LT22	NW151	NW151_GEN300_R1	1	1	11	8	68	94	115	444.1	32	10.3	78.8	536.65	600021
Lithuania	2022	LT22	NW151	NW151_GEN300_R2	2	2	7	5	66	113	115	500.8	38.1	11.2	80.7	499.3	540835
Lithuania	2022	LT22	NW152	NW152_GEN300_R1	1	1	12	8	71	77.7	115	282.9	28.2	11	74.9	593	694015
Lithuania	2022	LT22	NW152	NW152_GEN300_R2	2	2	17	6	70	95.7	115	458.6	36.7	10.8	77.7	574.4	662249
Lithuania	2022	LT22	NW153	NW153_GEN300_R1	1	1	13	8	68	89	115	459.7	32.9	10.6	78.2	536.65	600021
Lithuania	2022	LT22	NW153	NW153_GEN300_R2	2	2	10	1	68	101.3	115	488.9	37	11.2	78.8	536.65	600021
Lithuania	2022	LT22	NW154	NW154_GEN300_R1	1	1	14	8	68	88.7	115	541.4	36.2	10.8	79	536.65	600021
Lithuania	2022	LT22	NW154	NW154_GEN300_R2	2	2	11	2	66	92.3	115	625.3	40.7	11.4	80.9	499.3	540835
Lithuania	2022	LT22	NW155	NW155_GEN300_R1	1	1	15	8	69	90.7	115	497.9	32.1	11.7	77.9	556.05	631406
Lithuania	2022	LT22	NW155	NW155_GEN300_R2	2	2	12	12	68	97	115	569.8	38	11.9	80	536.65	600021
Lithuania	2022	LT22	NW156	NW156_GEN300_R1	1	1	16	8	70	94.7	115	445.8	29.1	11	75.9	574.4	662249
Lithuania	2022	LT22	NW156	NW156_GEN300_R2	2	2	19	13	67	107.3	115	377.3	34.5	12.1	74.7	517.7	569802
Lithuania	2022	LT22	NW157	NW157_GEN300_R1	1	1	17	8	71	94	115	456.4	29.8	11.4	78.2	593	694015
Lithuania	2022	LT22	NW157	NW157_GEN300_R2	2	2	9	9	71	94.7	115	447.2	30.9	11	78.1	593	694015
Lithuania	2022	LT22	NW158	NW158_GEN300_R1	1	1	18	8	73	86.3	117	544.1	26.7	11.4	75.7	630.8	760177
Lithuania	2022	LT22	NW158	NW158_GEN300_R2	2	2	7	4	72	91.7	117	502.3	32.3	11.6	78.1	612.4	727367
Lithuania	2022	LT22	NW159	NW159_GEN300_R1	1	1	19	8	72	89.7	116	418.6	28.9	9.6	74.5	612.4	727367
Lithuania	2022	LT22	NW159	NW159_GEN300_R2	2	2	2	4	71	97.7	116	559.1	36.4	10.1	75.9	593	694015
Lithuania	2022	LT22	NW160	NW160_GEN300_R1	1	1	20	8	67	84.3	115	338.4	32.6	11.1	77	517.7	596878
Lithuania	2022	LT22	NW160	NW160_GEN300_R2	2	2	1	4	67	100	115	351.5	38.1	11.3	78.6	517.7	569802
Lithuania	2022	LT22	NW161	NW161_GEN300_R1	1	1	1	9	66	96.3	115	565.2	34.5	11.8	78.2	499.3	566966
Lithuania	2022	LT22	NW161	NW161_GEN300_R2	2	2	20	12	66	91.7	115	471.6	38.1	11	77.8	499.3	540835
Lithuania	2022	LT22	NW162	NW162_GEN300_R1	1	1	2	9	68	94	115	512	30.2	12.1	76.3	536.65	618726
Lithuania	2022	LT22	NW162	NW162_GEN300_R2	2	2	13	1	68	94.7	115	490.1	34.8	11.9	79.2	536.65	600021
Lithuania	2022	LT22	NW163	NW163_GEN300_R1	1	1	3	9	68	90.7	115	458.6	30.9	11.7	77.4	536.65	618726
Lithuania	2022	LT22	NW163	NW163_GEN300_R2	2	2	6	14	68	99.3	115	609.1	37.4	11.9	79.4	536.65	600021
Lithuania	2022	LT22	NW164	NW164_GEN300_R1	1	1	4	9	70	94	115	483.9	31.7	10.7	78.1	574.4	662249
Lithuania	2022	LT22	NW164	NW164_GEN300_R2	2	2	8	11	70	101	115	607	36.2	12	80.1	574.4	662249
Lithuania	2022	LT22	NW165	NW165_GEN300_R1	1	1	5	9	71	NA	NA	NA	NA	NA	NA	593	694015
Lithuania	2022	LT22	NW165	NW165_GEN300_R2	2	2	11	5	71	91	115	430.1	32.5	10	78.6	593	694015
Lithuania	2022	LT22	NW166	NW166_GEN300_R1	1	1	6	9	69	NA	NA	NA	NA	NA	NA	556.05	631406
Lithuania	2022	LT22	NW166	NW166_GEN300_R2	2	2	18	11	69	105.3	115	494.4	37	11.1	79.7	556.05	631406
Lithuania	2022	LT22	NW167	NW167_GEN300_R1	1	1	7	9	68	88.7	115	350.3	29	10.8	75.6	536.65	618726
Lithuania	2022	LT22	NW167	NW167_GEN300_R2	2	2	2	7	68	96	115	362.6	37.8	12.2	79.1	536.65	600021
Lithuania	2022	LT22	NW168	NW168_GEN300_R1	1	1	8	9	70	96.3	115	471	29.1	11.2	78.4	574.4	672246
Lithuania	2022	LT22	NW168	NW168_GEN300_R2	2	2	1	7	70	99.3	115	497.3	32.2	10.9	79.2	574.4	662249
Lithuania	2022	LT22	NW169	NW169_GEN300_R1	1	1	9	9	72	89.3	116	471.6	31	10.8	76.3	612.4	727367
Lithuania	2022	LT22	NW169	NW169_GEN300_R2	2	2	17	7	69	99.3	116	572.1	38.9	12	78.9	556.05	631406
Lithuania	2022	LT22	NW170	NW170_GEN300_R1	1	1	10	9	68	NA	NA	NA	NA	NA	NA	536.65	600021
Lithuania	2022	LT22	NW170	NW170_GEN300_R2	2	2	12	13	68	91.7	115	434.6	34.9	11.5	79.4	536.65	600021
Lithuania	2022	LT22	NW171	NW171_GEN300_R1	1	1	11	9	69	89.3	115	470.5	30.9	11.2	76.7	556.05	631406
Lithuania	2022	LT22	NW171	NW171_GEN300_R2	2	2	9	6	67	96.7	115	501.4	37.4	10.3	79.3	517.7	569802
Lithuania	2022	LT22	NW172	NW172_GEN300_R1	1	1	12	9	68	NA	NA	NA	NA	NA	NA	536.65	600021
Lithuania	2022	LT22	NW172	NW172_GEN300_R2	2	2	3	8	68	101.7	115	472.1	35.1	11.7	79	536.65	600021
Lithuania	2022	LT22	NW173	NW173_GEN300_R1	1	1	13	9	70	NA	NA	NA	NA	NA	NA	574.4	662249
Lithuania	2022	LT22	NW173	NW173_GEN300_R2	2	2	6	2	67	98	115	483.9	38.6	13.4	80.8	517.7	569802
Lithuania	2022	LT22	NW174	NW174_GEN300_R1	1	1	14	9	69	NA	NA	NA	NA	NA	NA	556.05	631406
Lithuania	2022	LT22	NW174	NW174_GEN300_R2	2	2	17	9	68	100.3	115	501.8	40	12.6	82.4	536.65	600021
Lithuania	2022	LT22	NW175	NW175_GEN300_R1	1	1	15	9	70	93	115	512	31.8	11.8	78.4	574.4	662249
Lithuania	2022	LT22	NW175	NW175_GEN300_R2	2	2	10	4	67	94.3	115	447.5	39.8	11.5	81.4	517.7	569802
Lithuania	2022	LT22	NW176	NW176_GEN300_R1	1	1	16	9	71	95	115	486.9	32.6	11.9	79.8	593	694015
Lithuania	2022	LT22	NW176	NW176_GEN300_R2	2	2	15	6	69	98.7	115	445	39.6	11.3	81.8	556.05	631406
Lithuania	2022	LT22	NW177	NW177_GEN300_R1	1	1	17	9	70	94.7	115	430.2	33.4	11.6	80.2	574.4	662249
Lithuania	2022	LT22	NW177	NW177_GEN300_R2	2	2	12	10	69	94	115	444.8	37.2	11.6	81.3	556.05	631406
Lithuania	2022	LT22	NW178	NW178_GEN300_R1	1	1	18	9	70	98	116	467.8	34.6	11.3	79.7	574.4	662249
Lithuania	2022	LT22	NW178	NW178_GEN300_R2	2	2	19	12	69	99.3	116	390.3	37	13.2	79.8	556.05	631406
Lithuania	2022	LT22	NW179	NW179_GEN300_R1	1	1	19	9	70	90	115	390.7	33.4	10.7	78.1	574.4	662249
Lithuania	2022	LT22	NW179	NW179_GEN300_R2	2	2	15	4	68	100.7	115	490	41.5	12.1	81.9	536.65	600021
Lithuania	2022	LT22	NW180	NW180_GEN300_R1	1	1	20	9	70	90	115	376.8	31.1	11.2	78.9	574.4	662249
Lithuania	2022	LT22	NW180	NW180_GEN300_R2	2	2	5	10	71	99	115	432.1	34.4	11.7	80.3	593	694015
Lithuania	2022	LT22	NW181	NW181_GEN300_R1	1	1	1	10	71	97.7	116	644.5	33.4	12.2	76.6	593	694015
Lithuania	2022	LT22	NW181	NW181_GEN300_R2	2	2	7	11	70	86	116	431.6	30.9	10.5	76.6	574.4	662249
Lithuania	2022	LT22	NW182	NW182_GEN300_R1	1	1	2	10	71	102.7	116	565.2	31.7	12.8	78	593	694015
Lithuania	2022	LT22	NW182	NW182_GEN300_R2	2	2	16	7	69	101.3	116	504	35.9	11.5	80.2	556.05	631406
Lithuania	2022	LT22	NW183	NW183_GEN300_R1	1	1	3	10	68	91.3	115	553	32.8	12.2	78.1	536.65	600021
Lithuania	2022	LT22	NW183	NW183_GEN300_R2	2	2	6	12	68	92.3	115	487.3	34.5	11	79.4	536.65	600021
Lithuania	2022	LT22	NW184	NW184_GEN300_R1	1	1	4	10	70	100	115	566.5	32.6	11.3	79.1	574.4	662249
Lithuania	2022	LT22	NW184	NW184_GEN300_R2	2	2	14	7	70	97	115	447.5	33.4	11.2	79.9	574.4	662249
Lithuania	2022	LT22	NW185	NW185_GEN300_R1	1	1	5	10	69	79	115	362.9	32.3	12.9	81.1	556.05	631406
Lithuania	2022	LT22	NW185	NW185_GEN300_R2	2	2	3	9	69	85.7	115	346.3	36.4	12.5	82.2	556.05	631406
Lithuania	2022	LT22	NW186	NW186_GEN300_R1	1	1	6	10	69	84.7	115	375.9	33	12.6	82.6	556.05	631406
Lithuania	2022	LT22	NW186	NW186_GEN300_R2	2	2	12	1	70	79.7	115	269.5	28.5	12.6	79.9	574.4	662249
Lithuania	2022	LT22	NW187	NW187_GEN300_R1	1	1	7	10	70	80	115	295.7	32.9	12.7	81.7	574.4	662249
Lithuania	2022	LT22	NW187	NW187_GEN300_R2	2	2	18	9	68	91.7	115	471.6	35.2	13.6	81.8	536.65	600021
Lithuania	2022	LT22	NW188	NW188_GEN300_R1	1	1	8	10	70	78.7	115	323	30.3	12.9	80.8	574.4	662249
Lithuania	2022	LT22	NW188	NW188_GEN300_R2	2	2	14	10	70	92	115	402.9	36.7	14.4	83.1	574.4	662249
Lithuania	2022	LT22	NW189	NW189_GEN300_R1	1	1	9	10	71	95	115	404.2	31.2	11.4	79.3	593	694015
Lithuania	2022	LT22	NW189	NW189_GEN300_R2	2	2	12	15	69	102.7	115	521.7	38	10.8	81.1	556.05	631406
Lithuania	2022	LT22	NW190	NW190_GEN300_R1	1	1	10	10	70	99	115	431.6	35.1	11.7	79.5	574.4	662249
Lithuania	2022	LT22	NW190	NW190_GEN300_R2	2	2	18	3	67	103	115	505.2	35.7	12.3	80	517.7	569802
Lithuania	2022	LT22	NW191	NW191_GEN300_R1	1	1	11	10	69	79	115	404.2	30.4	12.9	80.4	556.05	631406
Lithuania	2022	LT22	NW191	NW191_GEN300_R2	2	2	16	1	68	88.7	115	391.6	37.8	13.6	83.2	536.65	600021
Lithuania	2022	LT22	NW192	NW192_GEN300_R1	1	1	12	10	69	NA	NA	NA	NA	NA	NA	556.05	631406
Lithuania	2022	LT22	NW192	NW192_GEN300_R2	2	2	20	8	69	88.3	115	409.3	36.4	14.1	82.8	556.05	631406
Lithuania	2022	LT22	NW193	NW193_GEN300_R1	1	1	13	10	70	75.3	115	269.8	30.5	13.5	82.2	574.4	662249
Lithuania	2022	LT22	NW193	NW193_GEN300_R2	2	2	15	11	68	89.7	115	407.5	36.4	13.9	82.8	536.65	600021
Lithuania	2022	LT22	NW194	NW194_GEN300_R1	1	1	14	10	70	110	115	337.6	33.2	12	81.6	574.4	662249
Lithuania	2022	LT22	NW194	NW194_GEN300_R2	2	2	2	11	69	88	115	318	34.8	12	82.5	556.05	631406
Lithuania	2022	LT22	NW195	NW195_GEN300_R1	1	1	15	10	71	89	115	405.1	33.3	13.4	80.9	593	694015
Lithuania	2022	LT22	NW195	NW195_GEN300_R2	2	2	1	11	71	85.7	115	323.3	32.4	13.2	80.9	593	694015
Lithuania	2022	LT22	NW196	NW196_GEN300_R1	1	1	16	10	71	87	115	391.6	32.2	13.2	81.3	593	694015
Lithuania	2022	LT22	NW196	NW196_GEN300_R2	2	2	8	2	66	87.7	115	458.1	32.1	13.7	81.2	499.3	540835
Lithuania	2022	LT22	NW197	NW197_GEN300_R1	1	1	17	10	70	80.7	115	334.9	29.6	13	81.4	574.4	662249
Lithuania	2022	LT22	NW197	NW197_GEN300_R2	2	2	4	6	68	85.7	115	471.6	37.2	13.9	81.9	536.65	600021
Lithuania	2022	LT22	NW198	NW198_GEN300_R1	1	1	18	10	72	96.7	115	474.3	32.8	10	78	612.4	727367
Lithuania	2022	LT22	NW198	NW198_GEN300_R2	2	2	12	8	69	98.7	115	558.2	37.6	11	79.7	556.05	631406
Lithuania	2022	LT22	NW199	NW199_GEN300_R1	1	1	19	10	71	91.7	115	406	30.8	10.2	77.5	593	694015
Lithuania	2022	LT22	NW199	NW199_GEN300_R2	2	2	8	4	68	98.7	115	564.6	37.7	11	80.3	536.65	600021
Lithuania	2022	LT22	NW200	NW200_GEN300_R1	1	1	20	10	71	90.3	115	458.6	32.7	10.5	79.1	593	694015
Lithuania	2022	LT22	NW200	NW200_GEN300_R2	2	2	5	5	69	101.7	115	406	36.9	12	79.8	556.05	631406
Lithuania	2022	LT22	NW201	NW201_GEN300_R1	1	1	1	11	71	101.7	116	684	36.8	11.6	78.2	593	694015
Lithuania	2022	LT22	NW201	NW201_GEN300_R2	2	2	12	5	70	98.7	116	536.7	35.5	11.2	77	574.4	662249
Lithuania	2022	LT22	NW202	NW202_GEN300_R1	1	1	2	11	68	90.3	115	591.4	32.3	11.4	81.2	536.65	600021
Lithuania	2022	LT22	NW202	NW202_GEN300_R2	2	2	12	7	68	88.7	115	579.3	37.6	10.3	82.3	536.65	600021
Lithuania	2022	LT22	NW203	NW203_GEN300_R1	1	1	3	11	72	96.7	116	658.7	34.8	11.5	77.2	612.4	727367
Lithuania	2022	LT22	NW203	NW203_GEN300_R2	2	2	18	2	70	96.7	116	390.7	38.8	12.1	78.1	574.4	662249
Lithuania	2022	LT22	NW204	NW204_GEN300_R1	1	1	4	11	68	75.3	115	551.8	33.7	10.7	80.1	536.65	600021
Lithuania	2022	LT22	NW204	NW204_GEN300_R2	2	2	3	6	66	80.3	115	592.8	38.8	11.5	81.1	499.3	540835
Lithuania	2022	LT22	NW205	NW205_GEN300_R1	1	1	5	11	68	81	115	362.9	36.9	12.7	81.6	536.65	600021
Lithuania	2022	LT22	NW205	NW205_GEN300_R2	2	2	14	6	66	90.3	115	393.9	39.9	11.6	81.5	499.3	540835
Lithuania	2022	LT22	NW206	NW206_GEN300_R1	1	1	6	11	66	69	115	456.5	41.3	11.9	82.2	499.3	540835
Lithuania	2022	LT22	NW206	NW206_GEN300_R2	2	2	4	12	68	73.3	115	525.4	41.8	12.5	82.1	536.65	600021
Lithuania	2022	LT22	NW207	NW207_GEN300_R1	1	1	7	11	72	91	115	443.6	39.5	12.2	82.8	612.4	727367
Lithuania	2022	LT22	NW207	NW207_GEN300_R2	2	2	14	4	69	97	115	473.7	43.2	12.5	84.3	556.05	631406
Lithuania	2022	LT22	NW208	NW208_GEN300_R1	1	1	8	11	69	84.3	116	659.4	34.7	13.3	80.8	556.05	631406
Lithuania	2022	LT22	NW208	NW208_GEN300_R2	2	2	5	13	70	84.3	116	553.6	36.7	13.9	81.4	574.4	662249
Lithuania	2022	LT22	NW209	NW209_GEN300_R1	1	1	9	11	67	84.3	115	497.3	39.6	11.5	80.8	517.7	569802
Lithuania	2022	LT22	NW209	NW209_GEN300_R2	2	2	3	13	67	90	115	496.8	42	13.3	82.7	517.7	569802
Lithuania	2022	LT22	NW210	NW210_GEN300_R1	1	1	10	11	70	87.7	115	472.1	29.6	11.2	78.2	574.4	662249
Lithuania	2022	LT22	NW210	NW210_GEN300_R2	2	2	14	9	69	90	115	501.9	32.3	10.4	78.2	556.05	631406
Lithuania	2022	LT22	NW211	NW211_GEN300_R1	1	1	11	11	68	90.3	115	498.5	30.1	10.5	80.8	536.65	600021
Lithuania	2022	LT22	NW211	NW211_GEN300_R2	2	2	12	9	66	94	115	472.9	34	10.8	82	499.3	540835
Lithuania	2022	LT22	NW212	NW212_GEN300_R1	1	1	12	11	69	83.3	116	497.3	32.7	10.6	80.6	556.05	631406
Lithuania	2022	LT22	NW212	NW212_GEN300_R2	2	2	17	13	70	79.7	116	431.5	34.1	11	82.1	574.4	662249
Lithuania	2022	LT22	NW213	NW213_GEN300_R1	1	1	13	11	66	80.7	115	536.6	40.1	12.2	82.5	499.3	540835
Lithuania	2022	LT22	NW213	NW213_GEN300_R2	2	2	13	12	68	79	115	447.2	39.3	12	82.4	536.65	600021
Lithuania	2022	LT22	NW214	NW214_GEN300_R1	1	1	14	11	69	100	116	478.3	36.4	11.2	80.3	556.05	631406
Lithuania	2022	LT22	NW214	NW214_GEN300_R2	2	2	19	1	69	105	116	349.6	37.4	13.7	80.6	556.05	631406
Lithuania	2022	LT22	NW215	NW215_GEN300_R1	1	1	15	11	70	96.7	115	637.4	36.9	11.5	81.6	574.4	662249
Lithuania	2022	LT22	NW215	NW215_GEN300_R2	2	2	14	5	67	96.7	115	383.5	37.8	10.9	81.7	517.7	569802
Lithuania	2022	LT22	NW216	NW216_GEN300_R1	1	1	16	11	72	93	115	631.9	40.1	11.5	76.9	612.4	727367
Lithuania	2022	LT22	NW216	NW216_GEN300_R2	2	2	8	8	70	91.3	115	606.3	40.8	10.1	78.4	574.4	662249
Lithuania	2022	LT22	NW217	NW217_GEN300_R1	1	1	17	11	69	85.3	115	582.8	43.6	10.6	79.3	556.05	631406
Lithuania	2022	LT22	NW217	NW217_GEN300_R2	2	2	2	9	70	80.3	115	443.6	36.8	9.7	77.4	574.4	662249
Lithuania	2022	LT22	NW218	NW218_GEN300_R1	1	1	18	11	70	85	115	501.9	37.5	10.4	77	574.4	662249
Lithuania	2022	LT22	NW218	NW218_GEN300_R2	2	2	1	9	71	85.3	115	443.6	37.4	10.6	76.9	593	694015
Lithuania	2022	LT22	NW219	NW219_GEN300_R1	1	1	19	11	68	86	115	407.4	37.6	9.1	80.4	536.65	600021
Lithuania	2022	LT22	NW219	NW219_GEN300_R2	2	2	2	8	68	94.7	115	660.1	43.9	11.3	80.3	536.65	600021
Lithuania	2022	LT22	NW220	NW220_GEN300_R1	1	1	20	11	68	93.7	115	459.1	38.3	10.5	80.6	536.65	600021
Lithuania	2022	LT22	NW220	NW220_GEN300_R2	2	2	1	8	70	99.3	115	444.6	38.7	12.6	80.6	574.4	662249
Lithuania	2022	LT22	NW221	NW221_GEN300_R1	1	1	1	12	70	92	115	631.8	39.4	11.7	80.4	574.4	662249
Lithuania	2022	LT22	NW221	NW221_GEN300_R2	2	2	20	10	70	87.7	115	627.6	37.7	11.2	79.5	574.4	662249
Lithuania	2022	LT22	NW222	NW222_GEN300_R1	1	1	2	12	66	93	115	728.4	39.9	12.3	82.4	499.3	540835
Lithuania	2022	LT22	NW222	NW222_GEN300_R2	2	2	4	13	65	93.3	115	608.4	42.8	11.6	83.2	482.55	514266
Lithuania	2022	LT22	NW223	NW223_GEN300_R1	1	1	3	12	70	94.7	115	714.1	41.1	12.5	82.3	574.4	662249
Lithuania	2022	LT22	NW223	NW223_GEN300_R2	2	2	10	8	70	82	115	350.3	38.1	10.7	82.7	574.4	662249
Lithuania	2022	LT22	NW224	NW224_GEN300_R1	1	1	4	12	72	87	116	590.8	38	10.7	77.2	612.4	727367
Lithuania	2022	LT22	NW224	NW224_GEN300_R2	2	2	5	1	71	91	116	470.5	39.6	10.9	77.5	593	694015
Lithuania	2022	LT22	NW225	NW225_GEN300_R1	1	1	5	12	71	78.3	116	510.8	36.9	10.5	74.9	593	694015
Lithuania	2022	LT22	NW225	NW225_GEN300_R2	2	2	8	10	71	83.7	116	607	42.6	12.3	77.7	593	694015
Lithuania	2022	LT22	NW226	NW226_GEN300_R1	1	1	6	12	69	88.3	115	576.7	33.3	10.6	79.7	556.05	631406
Lithuania	2022	LT22	NW226	NW226_GEN300_R2	2	2	2	5	68	92.3	115	544.8	36.5	12.1	82.1	536.65	600021
Lithuania	2022	LT22	NW227	NW227_GEN300_R1	1	1	7	12	68	96.7	115	498.5	40.4	10.8	78.8	536.65	600021
Lithuania	2022	LT22	NW227	NW227_GEN300_R2	2	2	1	5	65	95.3	115	471.3	40.9	12	79.6	482.55	514266
Lithuania	2022	LT22	NW228	NW228_GEN300_R1	1	1	8	12	72	96.7	115	644.5	43.5	11.7	75.9	612.4	727367
Lithuania	2022	LT22	NW228	NW228_GEN300_R2	2	2	2	15	71	94.3	115	501.4	49	12.6	77.9	593	694015
Lithuania	2022	LT22	NW229	NW229_GEN300_R1	1	1	9	12	70	93.7	115	643.7	40.1	10.7	80.3	574.4	662249
Lithuania	2022	LT22	NW229	NW229_GEN300_R2	2	2	19	5	68	99	115	505.6	42.4	10.6	81.2	536.65	600021
Lithuania	2022	LT22	NW230	NW230_GEN300_R1	1	1	10	12	66	91.7	115	498.5	30.6	12.5	82.7	499.3	540835
Lithuania	2022	LT22	NW230	NW230_GEN300_R2	2	2	18	8	66	90.7	115	405.6	33.5	13.6	81.8	499.3	540835
Lithuania	2022	LT22	NW231	NW231_GEN300_R1	1	1	11	12	68	101.7	115	633.2	36	9.8	80	536.65	600021
Lithuania	2022	LT22	NW231	NW231_GEN300_R2	2	2	6	6	69	105.3	115	526.7	33.4	12.3	79.8	556.05	631406
Lithuania	2022	LT22	NW232	NW232_GEN300_R1	1	1	12	12	68	85.7	115	512.6	41.4	10.5	77.2	536.65	600021
Lithuania	2022	LT22	NW232	NW232_GEN300_R2	2	2	4	2	69	83.3	115	418.2	38.9	9.9	75.4	556.05	631406
Lithuania	2022	LT22	NW233	NW233_GEN300_R1	1	1	13	12	67	80.3	115	529.1	43.4	13.7	81.7	517.7	569802
Lithuania	2022	LT22	NW233	NW233_GEN300_R2	2	2	3	14	66	84.3	115	583.3	45.9	15.3	80.8	499.3	540835
Lithuania	2022	LT22	NW234	NW234_GEN300_R1	1	1	14	12	71	85	116	698.2	38.8	11.2	77.9	593	694015
Lithuania	2022	LT22	NW234	NW234_GEN300_R2	2	2	9	11	69	90	116	422.9	30.4	12.9	78.3	556.05	631406
Lithuania	2022	LT22	NW235	NW235_GEN300_R1	1	1	15	12	67	96	115	688.4	34.2	12.3	78.4	517.7	569802
Lithuania	2022	LT22	NW235	NW235_GEN300_R2	2	2	5	4	67	91.7	115	446.5	34.3	10.8	78.9	517.7	569802
Lithuania	2022	LT22	NW236	NW236_GEN300_R1	1	1	16	12	69	93.3	115	658.7	44.7	12.2	83.5	556.05	631406
Lithuania	2022	LT22	NW236	NW236_GEN300_R2	2	2	12	2	67	93.3	115	596	45	12.4	84.8	517.7	569802
Lithuania	2022	LT22	NW237	NW237_GEN300_R1	1	1	17	12	71	81.7	115	619.5	37.4	11.7	79.1	593	694015
Lithuania	2022	LT22	NW237	NW237_GEN300_R2	2	2	17	12	69	80	115	578	39.2	11	80	556.05	631406
Lithuania	2022	LT22	NW238	NW238_GEN300_R1	1	1	18	12	69	106.7	115	499.6	41.9	10.7	80.4	556.05	631406
Lithuania	2022	LT22	NW238	NW238_GEN300_R2	2	2	19	2	68	105.7	115	446	44.8	12.6	81.6	536.65	600021
Lithuania	2022	LT22	NW239	NW239_GEN300_R1	1	1	19	12	69	88	115	445.6	36.2	10.6	80.3	556.05	631406
Lithuania	2022	LT22	NW239	NW239_GEN300_R2	2	2	8	7	68	98	115	446.7	40.1	11.7	80.5	536.65	600021
Lithuania	2022	LT22	NW240	NW240_GEN300_R1	1	1	20	12	71	88.7	116	621.7	36.5	10.4	77.2	593	694015
Lithuania	2022	LT22	NW240	NW240_GEN300_R2	2	2	17	1	71	97.7	116	462	39.7	12.5	78.2	593	694015
Lithuania	2022	LT22	NW241	NW241_GEN300_R1	1	1	1	13	72	98	117	762.7	34.5	11.8	76.3	612.4	727367
Lithuania	2022	LT22	NW241	NW241_GEN300_R2	2	2	14	3	70	95	117	578	36.9	9.9	77.3	574.4	662249
Lithuania	2022	LT22	NW242	NW242_GEN300_R1	1	1	2	13	68	97	115	684.7	39.2	12.6	78.8	536.65	600021
Lithuania	2022	LT22	NW242	NW242_GEN300_R2	2	2	19	10	67	95	115	538.7	41.8	10.8	80.5	517.7	569802
Lithuania	2022	LT22	NW243	NW243_GEN300_R1	1	1	3	13	72	101	117	685.5	38.1	12	75.8	612.4	727367
Lithuania	2022	LT22	NW243	NW243_GEN300_R2	2	2	2	3	69	101.7	116	583.5	40.7	10.9	78.9	556.05	631406
Lithuania	2022	LT22	NW244	NW244_GEN300_R1	1	1	4	13	71	95.3	116	669.8	33.4	10.8	77.9	593	694015
Lithuania	2022	LT22	NW244	NW244_GEN300_R2	2	2	1	3	70	87	116	469.4	32.2	9.5	76.9	574.4	662249
Lithuania	2022	LT22	NW245	NW245_GEN300_R1	1	1	5	13	71	98.7	115	550.5	40.9	11.1	77.8	593	694015
Lithuania	2022	LT22	NW245	NW245_GEN300_R2	2	2	15	9	71	87.7	115	402.8	36.2	10.1	75.4	593	694015
Lithuania	2022	LT22	NW246	NW246_GEN300_R1	1	1	6	13	72	99.7	116	628.1	42.8	10.3	79.9	612.4	727367
Lithuania	2022	LT22	NW246	NW246_GEN300_R2	2	2	16	5	70	100.3	116	462.4	40.5	12.2	80.8	574.4	662249
Lithuania	2022	LT22	NW247	NW247_GEN300_R1	1	1	7	13	68	90.7	115	483.9	37.2	11	77	536.65	600021
Lithuania	2022	LT22	NW247	NW247_GEN300_R2	2	2	8	12	68	86.3	115	429.3	35.1	10.5	76.7	536.65	600021
Lithuania	2022	LT22	NW248	NW248_GEN300_R1	1	1	8	13	67	79.7	115	579.3	31	11.9	76.4	517.7	569802
Lithuania	2022	LT22	NW248	NW248_GEN300_R2	2	2	7	10	68	80.7	115	420.1	30.1	10.9	74.8	536.65	600021
Lithuania	2022	LT22	NW249	NW249_GEN300_R1	1	1	9	13	74	104.3	117	603.5	33.5	11.8	77.1	646.65	790494
Lithuania	2022	LT22	NW249	NW249_GEN300_R2	2	2	19	11	73	104.3	117	577.8	35.1	11.3	78.3	630.8	760177
Lithuania	2022	LT22	NW250	NW250_GEN300_R1	1	1	10	13	71	85	116	672.9	39.8	11.2	75.5	593	694015
Lithuania	2022	LT22	NW250	NW250_GEN300_R2	2	2	14	11	71	88.3	116	580.7	40.5	11.3	77	593	694015
Lithuania	2022	LT22	NW251	NW251_GEN300_R1	1	1	11	13	71	85.7	115	606.3	43.6	10.4	77.3	593	694015
Lithuania	2022	LT22	NW251	NW251_GEN300_R2	2	2	2	10	68	82.7	115	619.3	43.9	10	77.2	536.65	600021
Lithuania	2022	LT22	NW252	NW252_GEN300_R1	1	1	12	13	69	88.3	115	470.5	38.2	10	77.5	556.05	631406
Lithuania	2022	LT22	NW252	NW252_GEN300_R2	2	2	1	10	68	92	115	472.1	39.8	12.7	77.9	536.65	600021
Lithuania	2022	LT22	NW253	NW253_GEN300_R1	1	1	13	13	71	90.7	115	524.2	35.6	11.3	77.6	593	694015
Lithuania	2022	LT22	NW253	NW253_GEN300_R2	2	2	16	4	70	91.3	115	535.4	35.3	10.3	77.6	574.4	662249
Lithuania	2022	LT22	NW254	NW254_GEN300_R1	1	1	14	13	70	89.3	115	592.1	39.7	12.1	76.4	574.4	662249
Lithuania	2022	LT22	NW254	NW254_GEN300_R2	2	2	7	14	69	91.7	115	481.3	43.2	12.8	78.4	556.05	631406
Lithuania	2022	LT22	NW255	NW255_GEN300_R1	1	1	15	13	70	87.3	116	699.8	41.7	12.8	80	574.4	662249
Lithuania	2022	LT22	NW255	NW255_GEN300_R2	2	2	9	3	68	79	115	501.9	35.4	9.8	78.8	536.65	600021
Lithuania	2022	LT22	NW256	NW256_GEN300_R1	1	1	16	13	69	86.3	115	631.3	40.6	12.6	77.8	556.05	631406
Lithuania	2022	LT22	NW256	NW256_GEN300_R2	2	2	4	4	66	89	115	417.2	38.1	12	77.5	499.3	540835
Lithuania	2022	LT22	NW257	NW257_GEN300_R1	1	1	17	13	73	107.3	117	560	35.8	12.6	78.8	630.8	760177
Lithuania	2022	LT22	NW257	NW257_GEN300_R2	2	2	12	6	71	102.7	116	525.4	37	11	79.5	593	694015
Lithuania	2022	LT22	NW258	NW258_GEN300_R1	1	1	18	13	75	118.7	117	580	35.6	11	79.5	663.1	822090
Lithuania	2022	LT22	NW258	NW258_GEN300_R2	2	2	19	9	73	115.7	117	469.7	35.5	12	79.9	630.8	760177
Lithuania	2022	LT22	NW259	NW259_GEN300_R1	1	1	19	13	70	89.3	116	460.2	46.8	11.1	79.8	574.4	662249
Lithuania	2022	LT22	NW259	NW259_GEN300_R2	2	2	14	12	68	89	116	510.2	49.7	10.4	81.2	536.65	600021
Lithuania	2022	LT22	NW260	NW260_GEN300_R1	1	1	20	13	69	77	116	613.7	43.5	11.1	80.2	556.05	631406
Lithuania	2022	LT22	NW260	NW260_GEN300_R2	2	2	19	6	67	82.3	115	585.4	47.5	11.3	81.8	517.7	569802
Lithuania	2022	LT22	NW261	NW261_GEN300_R1	1	1	1	14	70	86.3	117	628.9	34.9	12.9	80	574.4	662249
Lithuania	2022	LT22	NW261	NW261_GEN300_R2	2	2	4	1	69	84	117	484.5	33.4	11.5	82.2	556.05	631406
Lithuania	2022	LT22	NW262	NW262_GEN300_R1	1	1	2	14	74	92	118	530.9	29.4	12.6	77.4	646.65	790494
Lithuania	2022	LT22	NW262	NW262_GEN300_R2	2	2	16	10	73	90.7	118	511.4	29.2	10.6	77.6	630.8	760177
Lithuania	2022	LT22	NW263	NW263_GEN300_R1	1	1	3	14	70	92.7	115	686.3	38.6	11.8	79.6	574.4	662249
Lithuania	2022	LT22	NW263	NW263_GEN300_R2	2	2	8	6	68	92.7	115	647.7	40.8	11.8	80.2	536.65	600021
Lithuania	2022	LT22	NW264	NW264_GEN300_R1	1	1	4	14	68	92.3	115	633.2	47.7	11.1	81.1	536.65	600021
Lithuania	2022	LT22	NW264	NW264_GEN300_R2	2	2	11	8	68	97.3	115	618.6	47.7	11.1	81.2	536.65	600021
Lithuania	2022	LT22	NW265	NW265_GEN300_R1	1	1	5	14	68	92.7	115	523.6	45.3	11.1	81.2	536.65	600021
Lithuania	2022	LT22	NW265	NW265_GEN300_R2	2	2	20	14	66	98.7	115	653.6	47.6	12.7	82.6	499.3	540835
Lithuania	2022	LT22	NW266	NW266_GEN300_R1	1	1	6	14	66	87	115	592.8	43.9	10.9	81.3	499.3	540835
Lithuania	2022	LT22	NW266	NW266_GEN300_R2	2	2	5	15	68	86	115	535.8	41.3	11	81.7	536.65	600021
Lithuania	2022	LT22	NW267	NW267_GEN300_R1	1	1	7	14	69	85.3	115	510.8	43.7	10.1	80.2	556.05	631406
Lithuania	2022	LT22	NW267	NW267_GEN300_R2	2	2	11	1	70	83	115	517.8	40.4	10.1	80.7	574.4	662249
Lithuania	2022	LT22	NW268	NW268_GEN300_R1	1	1	8	14	69	87.7	116	674.4	44.4	11.6	78.9	556.05	631406
Lithuania	2022	LT22	NW268	NW268_GEN300_R2	2	2	13	9	68	86.7	116	681.4	48.4	12.3	81.1	536.65	600021
Lithuania	2022	LT22	NW269	NW269_GEN300_R1	1	1	9	14	70	98	116	578.7	39.4	11.2	79.9	574.4	662249
Lithuania	2022	LT22	NW269	NW269_GEN300_R2	2	2	16	3	69	96.3	116	526.7	40.1	11.1	80.5	556.05	631406
Lithuania	2022	LT22	NW270	NW270_GEN300_R1	1	1	10	14	70	84	115	594.2	41.3	12	79.5	574.4	662249
Lithuania	2022	LT22	NW270	NW270_GEN300_R2	2	2	18	13	70	85.7	115	565.7	40.9	13.2	79.3	574.4	662249
Lithuania	2022	LT22	NW271	NW271_GEN300_R1	1	1	11	14	71	105.3	115	672.1	38.4	10.4	79.1	593	694015
Lithuania	2022	LT22	NW271	NW271_GEN300_R2	2	2	5	9	69	107	115	609.9	38.3	11.2	79.8	556.05	631406
Lithuania	2022	LT22	NW272	NW272_GEN300_R1	1	1	12	14	71	108	116	510.8	35.6	9.8	77.9	593	694015
Lithuania	2022	LT22	NW272	NW272_GEN300_R2	2	2	20	11	70	107.3	116	485.7	39.7	11.4	79.9	574.4	662249
Lithuania	2022	LT22	NW273	NW273_GEN300_R1	1	1	13	14	67	95.7	115	577.3	39.4	11.2	82.5	517.7	569802
Lithuania	2022	LT22	NW273	NW273_GEN300_R2	2	2	6	8	68	89.3	115	515.7	38.3	11.1	82.9	536.65	600021
Lithuania	2022	LT22	NW274	NW274_GEN300_R1	1	1	14	14	69	96	115	593.5	49.3	12.2	81.1	556.05	631406
Lithuania	2022	LT22	NW274	NW274_GEN300_R2	2	2	12	14	68	91	115	527.3	49.8	11.8	80.9	536.65	600021
Lithuania	2022	LT22	NW275	NW275_GEN300_R1	1	1	15	14	68	100	115	634.1	40.6	13.2	81.3	536.65	600021
Lithuania	2022	LT22	NW275	NW275_GEN300_R2	2	2	20	4	66	99.7	115	582.4	44	11.9	82.6	499.3	540835
Lithuania	2022	LT22	NW276	NW276_GEN300_R1	1	1	16	14	68	102.3	115	706	49	12.8	81.2	536.65	600021
Lithuania	2022	LT22	NW276	NW276_GEN300_R2	2	2	17	11	66	100.3	115	349.5	43.1	9.7	80	499.3	540835
Lithuania	2022	LT22	NW277	NW277_GEN300_R1	1	1	17	14	67	90.7	115	670	41.7	12.3	79.7	517.7	569802
Lithuania	2022	LT22	NW277	NW277_GEN300_R2	2	2	16	13	66	88	115	517.4	37.7	10.5	77.8	499.3	540835
Lithuania	2022	LT22	NW278	NW278_GEN300_R1	1	1	18	14	68	86.3	115	676.7	38.1	11.1	77	536.65	600021
Lithuania	2022	LT22	NW278	NW278_GEN300_R2	2	2	11	7	66	90.7	115	570.4	39.3	9.8	76.4	499.3	540835
Lithuania	2022	LT22	NW279	NW279_GEN300_R1	1	1	19	14	68	94.7	115	550.5	33.9	10.6	81.2	536.65	600021
Lithuania	2022	LT22	NW279	NW279_GEN300_R2	2	2	15	5	68	95.7	115	484.5	34	10.1	81.7	536.65	600021
Lithuania	2022	LT22	NW280	NW280_GEN300_R1	1	1	20	14	68	94.7	115	631.8	35.5	11.1	81.1	536.65	600021
Lithuania	2022	LT22	NW280	NW280_GEN300_R2	2	2	7	9	68	102.7	115	689.5	33.5	10.4	81.6	536.65	600021
Lithuania	2022	LT22	NW281	NW281_GEN300_R1	1	1	1	15	68	101.7	115	751.9	33.1	11.1	81.2	536.65	600021
Lithuania	2022	LT22	NW281	NW281_GEN300_R2	2	2	10	3	68	103	115	630.7	34.2	10.3	82.1	536.65	600021
Lithuania	2022	LT22	NW282	NW282_GEN300_R1	1	1	2	15	67	100.3	115	646.7	32.4	10.9	81.2	517.7	569802
Lithuania	2022	LT22	NW282	NW282_GEN300_R2	2	2	8	13	67	98.3	115	525.5	35.1	10.3	82.3	517.7	569802
Lithuania	2022	LT22	NW283	NW283_GEN300_R1	1	1	3	15	67	96.7	115	594.2	34.3	11.2	78.4	517.7	569802
Lithuania	2022	LT22	NW283	NW283_GEN300_R2	2	2	4	15	66	96	115	547.2	37.6	11.4	80.4	499.3	540835
Lithuania	2022	LT22	NW284	NW284_GEN300_R1	1	1	4	15	66	86.7	115	537.7	39.6	10.4	82.7	499.3	540835
Lithuania	2022	LT22	NW284	NW284_GEN300_R2	2	2	15	10	66	96.7	115	641.9	41.5	10.8	82.9	499.3	540835
Lithuania	2022	LT22	NW285	NW285_GEN300_R1	1	1	5	15	70	74.7	116	417.2	37.7	10.6	80.3	574.4	662249
Lithuania	2022	LT22	NW285	NW285_GEN300_R2	2	2	15	8	69	80	116	462.5	38.5	11.3	82.3	556.05	631406
Lithuania	2022	LT22	NW286	NW286_GEN300_R1	1	1	6	15	68	88	115	591.4	45.5	10	78.9	536.65	600021
Lithuania	2022	LT22	NW286	NW286_GEN300_R2	2	2	17	14	69	89.3	115	608.4	42.3	10.8	77.6	556.05	631406
Lithuania	2022	LT22	NW287	NW287_GEN300_R1	1	1	7	15	70	85.3	116	484.5	41	9.7	78.8	574.4	662249
Lithuania	2022	LT22	NW287	NW287_GEN300_R2	2	2	3	10	70	98.3	116	753.6	41.5	12	80	574.4	662249
Lithuania	2022	LT22	NW288	NW288_GEN300_R1	1	1	8	15	71	83	115	553.7	35.6	11.3	76.3	593	694015
Lithuania	2022	LT22	NW288	NW288_GEN300_R2	2	2	4	14	69	91.3	115	543.9	38.4	11.7	77.9	556.05	631406
Lithuania	2022	LT22	NW289	NW289_GEN300_R1	1	1	9	15	71	83	117	590.8	35	11.1	80.9	593	694015
Lithuania	2022	LT22	NW289	NW289_GEN300_R2	2	2	14	2	69	85.7	117	435.8	36	12.6	82.8	556.05	631406
Lithuania	2022	LT22	NW290	NW290_GEN300_R1	1	1	10	15	68	96	115	578	33.1	10.2	81.6	536.65	600021
Lithuania	2022	LT22	NW290	NW290_GEN300_R2	2	2	17	4	68	97	115	540.2	33.2	10.2	81.6	536.65	600021
Lithuania	2022	LT22	NW291	NW291_GEN300_R1	1	1	11	15	70	87	116	565.2	37.4	10.8	78.5	574.4	662249
Lithuania	2022	LT22	NW291	NW291_GEN300_R2	2	2	9	13	71	93.3	116	589.1	39.9	11.7	80	593	694015
Lithuania	2022	LT22	NW292	NW292_GEN300_R1	1	1	12	15	70	106.7	116	497.9	36	10.1	79	574.4	662249
Lithuania	2022	LT22	NW292	NW292_GEN300_R2	2	2	17	5	69	111.3	116	361.6	38.2	11.8	80	556.05	631406
Lithuania	2022	LT22	NW293	NW293_GEN300_R1	1	1	13	15	70	106	115	631.8	38.7	10.6	80.4	574.4	662249
Lithuania	2022	LT22	NW293	NW293_GEN300_R2	2	2	10	5	68	109	115	567.8	39.7	9.4	79.8	536.65	600021
Lithuania	2022	LT22	NW294	NW294_GEN300_R1	1	1	14	15	68	105	115	584.7	33.9	10.7	81	536.65	600021
Lithuania	2022	LT22	NW294	NW294_GEN300_R2	2	2	6	7	67	101.3	115	619	36.5	10.2	81.8	517.7	569802
Lithuania	2022	LT22	NW295	NW295_GEN300_R1	1	1	15	15	68	102	115	728.4	34.7	11.6	81.8	536.65	600021
Lithuania	2022	LT22	NW295	NW295_GEN300_R2	2	2	9	10	68	92.3	115	429.9	32.1	9.9	80.5	536.65	600021
Lithuania	2022	LT22	NW296	NW296_GEN300_R1	1	1	16	15	68	103	115	672.1	34.4	11.7	81	536.65	600021
Lithuania	2022	LT22	NW296	NW296_GEN300_R2	2	2	9	8	67	102	115	608.4	35.6	10.5	81.6	517.7	569802
Lithuania	2022	LT22	NW297	NW297_GEN300_R1	1	1	17	15	70	94	116	588	32.6	11.1	81.3	574.4	662249
Lithuania	2022	LT22	NW297	NW297_GEN300_R2	2	2	16	12	69	85.3	115	402.9	29.2	9.9	80.4	556.05	631406
Lithuania	2022	LT22	NW298	NW298_GEN300_R1	1	1	18	15	69	97.7	116	632.5	32	10.2	80.4	556.05	631406
Lithuania	2022	LT22	NW298	NW298_GEN300_R2	2	2	10	14	69	98.7	116	634	34.1	11.5	82.9	556.05	631406
Lithuania	2022	LT22	NW299	NW299_GEN300_R1	1	1	19	15	70	100.7	116	565.2	37.7	10.2	78	574.4	662249
Lithuania	2022	LT22	NW299	NW299_GEN300_R2	2	2	18	6	69	108	116	595.3	40.5	11.3	80.1	556.05	631406
Lithuania	2022	LT22	NW300	NW300_GEN300_R1	1	1	20	15	69	104.3	115	539.5	33.3	11.7	80.2	556.05	631406
Lithuania	2022	LT22	NW300	NW300_GEN300_R2	2	2	15	2	68	108	115	537.5	37.7	11.1	81.8	536.65	600021
Lithuania	2023	LT23	NW001	NW001_GEN300_R1	1	1	1	1	55	69	101	491.04	40.8	14.5	78.6	500.6	456869
Lithuania	2023	LT23	NW001	NW001_GEN300_R2	2	2	6	8	56	59	101	229.36	40.4	15.8	78.4	514.45	478497
Lithuania	2023	LT23	NW002	NW002_GEN300_R1	1	1	2	1	54	67.67	101	443.11	37.2	14.6	79.8	483.4	432726
Lithuania	2023	LT23	NW002	NW002_GEN300_R2	2	2	4	12	55	62.33	101	305.31	36.8	15.6	79.1	500.6	456869
Lithuania	2023	LT23	NW003	NW003_GEN300_R1	1	1	3	1	52	57.67	101	438.89	34.4	14.1	79	450.35	387406
Lithuania	2023	LT23	NW003	NW003_GEN300_R2	2	2	11	4	52	56.33	101	222.6	35.2	15.8	76.6	450.35	387406
Lithuania	2023	LT23	NW004	NW004_GEN300_R1	1	1	4	1	55	78.67	101	533.53	43.2	13.8	80.3	500.6	456869
Lithuania	2023	LT23	NW004	NW004_GEN300_R2	2	2	4	8	56	60.33	101	230.74	42.8	15.1	79.7	514.45	478497
Lithuania	2023	LT23	NW005	NW005_GEN300_R1	1	1	5	1	52	57.67	101	310.88	34	14.6	78.4	450.35	387406
Lithuania	2023	LT23	NW005	NW005_GEN300_R2	2	2	4	2	52	62.67	101	277.55	33.6	16.1	75.2	450.35	387406
Lithuania	2023	LT23	NW006	NW006_GEN300_R1	1	1	6	1	55	67.33	101	262.23	40.4	15.4	79.6	500.6	456869
Lithuania	2023	LT23	NW006	NW006_GEN300_R2	2	2	14	15	54	68.33	101	289.51	40	14.7	80.2	483.4	432726
Lithuania	2023	LT23	NW007	NW007_GEN300_R1	1	1	7	1	52	68	101	254.23	41.6	14.9	78.2	450.35	387406
Lithuania	2023	LT23	NW007	NW007_GEN300_R2	2	2	14	13	52	74.33	101	332.98	41.2	15.8	80.5	450.35	387406
Lithuania	2023	LT23	NW008	NW008_GEN300_R1	1	1	8	1	55	59.67	101	298.11	33.6	14.3	78.3	500.6	456869
Lithuania	2023	LT23	NW008	NW008_GEN300_R2	2	2	7	14	55	54	101	124.08	32.8	15.6	77.4	500.6	456869
Lithuania	2023	LT23	NW009	NW009_GEN300_R1	1	1	9	1	55	63	101	317.44	42.8	13.7	82.8	500.6	456869
Lithuania	2023	LT23	NW009	NW009_GEN300_R2	2	2	2	2	55	77.67	101	420.02	40.8	14.5	82.3	500.6	456869
Lithuania	2023	LT23	NW010	NW010_GEN300_R1	1	1	10	1	56	64.33	101	275.42	39.2	15.1	80.7	514.45	478497
Lithuania	2023	LT23	NW010	NW010_GEN300_R2	2	2	2	12	55	70.67	101	295.75	38.8	14.9	80.3	500.6	456869
Lithuania	2023	LT23	NW011	NW011_GEN300_R1	1	1	11	1	55	60	101	328.9	37.6	14.2	79.9	500.6	456869
Lithuania	2023	LT23	NW011	NW011_GEN300_R2	2	2	12	13	55	57.67	101	335.38	36.8	14.9	80.3	500.6	456869
Lithuania	2023	LT23	NW012	NW012_GEN300_R1	1	1	12	1	52	58.67	101	217.91	42.8	14.8	76.8	450.35	387406
Lithuania	2023	LT23	NW012	NW012_GEN300_R2	2	2	1	13	52	65.33	101	223.83	42.4	14.7	76.7	450.35	387406
Lithuania	2023	LT23	NW013	NW013_GEN300_R1	1	1	13	1	53	67.33	101	202.83	44.4	15.8	81.9	466.7	409623
Lithuania	2023	LT23	NW013	NW013_GEN300_R2	2	2	1	2	53	71.67	101	318.14	43.6	15.6	82.8	466.7	409623
Lithuania	2023	LT23	NW014	NW014_GEN300_R1	1	1	14	1	55	50.33	101	163.08	39.2	17.2	78.8	500.6	456869
Lithuania	2023	LT23	NW014	NW014_GEN300_R2	2	2	4	14	55	59	101	205.84	38.4	17.3	80.5	500.6	456869
Lithuania	2023	LT23	NW015	NW015_GEN300_R1	1	1	15	1	56	58	101	204.45	32	13.6	76.1	514.45	478497
Lithuania	2023	LT23	NW015	NW015_GEN300_R2	2	2	7	5	57	66.67	101	181.2	31.6	13	79.7	529.85	502076
Lithuania	2023	LT23	NW016	NW016_GEN300_R1	1	1	16	1	53	55	101	223.59	31.6	15.7	73.4	466.7	409623
Lithuania	2023	LT23	NW016	NW016_GEN300_R2	2	2	18	4	53	54	101	273.19	31.6	15.4	79.7	466.7	409623
Lithuania	2023	LT23	NW017	NW017_GEN300_R1	1	1	17	1	53	58.67	101	246.75	36.4	16.5	77.5	466.7	409623
Lithuania	2023	LT23	NW017	NW017_GEN300_R2	2	2	10	9	52	60	101	304.64	36.4	16	78.7	450.35	387406
Lithuania	2023	LT23	NW018	NW018_GEN300_R1	1	1	18	1	54	62.33	101	291.43	32.8	14.3	78.9	483.4	432726
Lithuania	2023	LT23	NW018	NW018_GEN300_R2	2	2	10	10	53	72.33	101	391.45	32.4	14.6	79.3	466.7	409623
Lithuania	2023	LT23	NW019	NW019_GEN300_R1	1	1	19	1	55	58	106	416.78	45.2	14.7	82.2	500.6	456869
Lithuania	2023	LT23	NW019	NW019_GEN300_R2	2	2	3	7	55	48.33	104	370.13	45.6	15.1	82.1	500.6	456869
Lithuania	2023	LT23	NW020	NW020_GEN300_R1	1	1	20	1	55	70	101	283.91	42.8	18.6	78.1	500.6	456869
Lithuania	2023	LT23	NW020	NW020_GEN300_R2	2	2	1	12	55	62.33	101	163.98	42	18.1	78.3	500.6	456869
Lithuania	2023	LT23	NW021	NW021_GEN300_R1	1	1	1	2	56	66.67	106	288.65	40.4	16.2	79.7	514.45	478497
Lithuania	2023	LT23	NW021	NW021_GEN300_R2	2	2	3	3	55	68	104	282.93	40	17.1	79.4	500.6	456869
Lithuania	2023	LT23	NW022	NW022_GEN300_R1	1	1	2	2	52	70	101	477.73	45.2	13.3	81.4	450.35	387406
Lithuania	2023	LT23	NW022	NW022_GEN300_R2	2	2	12	7	52	63.33	101	380.2	45.2	13.5	81.5	450.35	387406
Lithuania	2023	LT23	NW023	NW023_GEN300_R1	1	1	3	2	54	62	101	405.77	30	14.3	78.4	483.4	432726
Lithuania	2023	LT23	NW023	NW023_GEN300_R2	2	2	3	10	54	57.67	101	276.64	29.6	14.3	80	483.4	432726
Lithuania	2023	LT23	NW024	NW024_GEN300_R1	1	1	4	2	56	64	101	278.18	34	16.5	78.5	514.45	478497
Lithuania	2023	LT23	NW024	NW024_GEN300_R2	2	2	8	4	56	51.67	101	228.48	34.4	15.6	79.9	514.45	478497
Lithuania	2023	LT23	NW025	NW025_GEN300_R1	1	1	5	2	56	58.33	101	253.36	37.2	15.5	80.2	514.45	478497
Lithuania	2023	LT23	NW025	NW025_GEN300_R2	2	2	9	12	55	63	101	274.48	36.8	15.6	81.5	500.6	456869
Lithuania	2023	LT23	NW026	NW026_GEN300_R1	1	1	6	2	56	54	101	280.75	38.4	15.1	80.2	514.45	478497
Lithuania	2023	LT23	NW026	NW026_GEN300_R2	2	2	20	15	56	60.33	101	235.66	36.8	15.4	79.4	514.45	478497
Lithuania	2023	LT23	NW027	NW027_GEN300_R1	1	1	7	2	55	54.33	101	319.53	38.8	15.1	81.2	500.6	456869
Lithuania	2023	LT23	NW027	NW027_GEN300_R2	2	2	18	15	55	57.67	101	254.23	39.6	15.1	79.7	500.6	456869
Lithuania	2023	LT23	NW028	NW028_GEN300_R1	1	1	8	2	56	66	102	340.75	39.2	13.8	80.3	514.45	478497
Lithuania	2023	LT23	NW028	NW028_GEN300_R2	2	2	5	1	56	71.67	102	351.33	38	14.5	79.2	514.45	478497
Lithuania	2023	LT23	NW029	NW029_GEN300_R1	1	1	9	2	55	58.33	102	397.92	41.2	13.7	81.2	500.6	456869
Lithuania	2023	LT23	NW029	NW029_GEN300_R2	2	2	3	8	56	63	102	247.06	40.4	14.7	80	514.45	478497
Lithuania	2023	LT23	NW030	NW030_GEN300_R1	1	1	10	2	56	71.67	101	415.42	41.2	14.7	80.3	514.45	478497
Lithuania	2023	LT23	NW030	NW030_GEN300_R2	2	2	17	10	56	66.67	101	332.16	41.6	14.4	80.3	514.45	478497
Lithuania	2023	LT23	NW031	NW031_GEN300_R1	1	1	11	2	56	66.33	101	318.84	39.2	15.3	78.9	514.45	478497
Lithuania	2023	LT23	NW031	NW031_GEN300_R2	2	2	14	3	58	66.33	101	294.77	39.2	15.7	79	544.1	525080
Lithuania	2023	LT23	NW032	NW032_GEN300_R1	1	1	12	2	58	59.67	102	293.34	39.6	14.3	78.7	544.1	525080
Lithuania	2023	LT23	NW032	NW032_GEN300_R2	2	2	8	1	58	64.33	102	350.56	39.6	14.3	78.9	544.1	525080
Lithuania	2023	LT23	NW033	NW033_GEN300_R1	1	1	13	2	52	71.33	101	203.72	33.2	14.9	78.2	450.35	387406
Lithuania	2023	LT23	NW033	NW033_GEN300_R2	2	2	19	1	53	70	101	236.27	34.4	15.3	80.4	466.7	409623
Lithuania	2023	LT23	NW034	NW034_GEN300_R1	1	1	14	2	54	55.67	101	251.16	36.8	14.6	76.7	483.4	432726
Lithuania	2023	LT23	NW034	NW034_GEN300_R2	2	2	19	2	55	64.67	101	323.31	35.6	15.5	79.8	500.6	456869
Lithuania	2023	LT23	NW035	NW035_GEN300_R1	1	1	15	2	55	52.33	101	257.3	38	15.4	77	500.6	456869
Lithuania	2023	LT23	NW035	NW035_GEN300_R2	2	2	7	1	55	63.33	101	291.43	37.2	15	78.9	500.6	456869
Lithuania	2023	LT23	NW036	NW036_GEN300_R1	1	1	16	2	57	71.33	101	347.7	30.4	17.1	76.9	529.85	502076
Lithuania	2023	LT23	NW036	NW036_GEN300_R2	2	2	12	6	57	71.33	101	358.05	30.4	17.6	79.5	529.85	502076
Lithuania	2023	LT23	NW037	NW037_GEN300_R1	1	1	17	2	57	70.33	101	334.52	28.8	17	78.6	529.85	502076
Lithuania	2023	LT23	NW037	NW037_GEN300_R2	2	2	19	7	57	72	101	323.67	28.4	17.3	78.7	529.85	502076
Lithuania	2023	LT23	NW038	NW038_GEN300_R1	1	1	18	2	56	66.33	102	320.16	40	14.5	78.8	514.45	478497
Lithuania	2023	LT23	NW038	NW038_GEN300_R2	2	2	9	6	55	79	102	407.5	40	13.9	79.3	500.6	456869
Lithuania	2023	LT23	NW039	NW039_GEN300_R1	1	1	19	2	53	76.33	101	306.73	36.4	15.6	77.5	466.7	409623
Lithuania	2023	LT23	NW039	NW039_GEN300_R2	2	2	20	6	52	71.67	101	258.09	35.6	15.6	78.6	450.35	387406
Lithuania	2023	LT23	NW040	NW040_GEN300_R1	1	1	20	2	53	73.33	101	331.24	36.8	15.8	80.4	466.7	409623
Lithuania	2023	LT23	NW040	NW040_GEN300_R2	2	2	16	10	52	66	101	306.77	36	15.9	80.4	450.35	387406
Lithuania	2023	LT23	NW041	NW041_GEN300_R1	1	1	1	3	55	63.33	101	367.76	39.6	14.1	80.8	500.6	456869
Lithuania	2023	LT23	NW041	NW041_GEN300_R2	2	2	18	3	56	56	101	229.98	38	15.1	80.5	514.45	478497
Lithuania	2023	LT23	NW042	NW042_GEN300_R1	1	1	2	3	55	72.67	101	362.98	41.2	14.2	80.3	500.6	456869
Lithuania	2023	LT23	NW042	NW042_GEN300_R2	2	2	16	3	55	67	101	334	41.2	14.4	79.3	500.6	456869
Lithuania	2023	LT23	NW043	NW043_GEN300_R1	1	1	3	3	55	76.67	101	265.28	36.8	16.2	77.5	500.6	456869
Lithuania	2023	LT23	NW043	NW043_GEN300_R2	2	2	10	13	55	65	101	211.84	35.6	16.8	77.9	500.6	456869
Lithuania	2023	LT23	NW044	NW044_GEN300_R1	1	1	4	3	53	75	101	230.12	38	15.8	78.5	466.7	409623
Lithuania	2023	LT23	NW044	NW044_GEN300_R2	2	2	9	7	53	81	101	218.36	38	15.4	78.9	466.7	409623
Lithuania	2023	LT23	NW045	NW045_GEN300_R1	1	1	5	3	52	61	101	118.69	34.4	18.7	78.8	450.35	387406
Lithuania	2023	LT23	NW045	NW045_GEN300_R2	2	2	17	4	52	71	101	173.85	33.6	17.6	79.8	450.35	387406
Lithuania	2023	LT23	NW046	NW046_GEN300_R1	1	1	6	3	54	62.33	101	280.62	37.2	15.2	77.9	483.4	432726
Lithuania	2023	LT23	NW046	NW046_GEN300_R2	2	2	19	13	55	68	101	351.38	37.2	14.8	79.1	500.6	456869
Lithuania	2023	LT23	NW047	NW047_GEN300_R1	1	1	7	3	54	59.67	101	322.64	35.6	14.8	80.5	483.4	432726
Lithuania	2023	LT23	NW047	NW047_GEN300_R2	2	2	11	11	55	54.33	101	391.45	36.4	14.9	79.9	500.6	456869
Lithuania	2023	LT23	NW048	NW048_GEN300_R1	1	1	8	3	58	62.67	101	374.7	33.6	14.2	80.1	544.1	525080
Lithuania	2023	LT23	NW048	NW048_GEN300_R2	2	2	17	1	57	64.67	101	331.24	34	15	79.5	529.85	502076
Lithuania	2023	LT23	NW049	NW049_GEN300_R1	1	1	9	3	54	56.67	101	440.34	48.8	12.6	79.7	483.4	432726
Lithuania	2023	LT23	NW049	NW049_GEN300_R2	2	2	3	15	55	60	101	317.44	48	14.8	81.6	500.6	456869
Lithuania	2023	LT23	NW050	NW050_GEN300_R1	1	1	10	3	54	60.67	102	322.25	34	14	78.2	483.4	432726
Lithuania	2023	LT23	NW050	NW050_GEN300_R2	2	2	12	2	54	63.67	102	349.4	32.4	13.9	79.6	483.4	432726
Lithuania	2023	LT23	NW051	NW051_GEN300_R1	1	1	11	3	54	63.67	101	338.77	38.4	13.6	79.1	483.4	432726
Lithuania	2023	LT23	NW051	NW051_GEN300_R2	2	2	20	9	56	61	101	294.53	37.6	14.6	79.7	514.45	478497
Lithuania	2023	LT23	NW052	NW052_GEN300_R1	1	1	12	3	54	63.33	101	283.69	37.6	13.2	79.1	483.4	432726
Lithuania	2023	LT23	NW052	NW052_GEN300_R2	2	2	2	1	53	72	101	499.87	38	12.9	79.5	466.7	409623
Lithuania	2023	LT23	NW053	NW053_GEN300_R1	1	1	13	3	55	68.33	101	208.17	34.8	16.1	78.2	500.6	456869
Lithuania	2023	LT23	NW053	NW053_GEN300_R2	2	2	12	5	55	65	101	272.67	33.6	16.1	79.6	500.6	456869
Lithuania	2023	LT23	NW054	NW054_GEN300_R1	1	1	14	3	52	69	101	302.53	57.2	16.4	79.7	450.35	387406
Lithuania	2023	LT23	NW054	NW054_GEN300_R2	2	2	13	13	53	76.67	101	250.64	55.2	18.1	80.3	466.7	409623
Lithuania	2023	LT23	NW055	NW055_GEN300_R1	1	1	15	3	58	71	102	378.03	41.6	13.6	79	544.1	525080
Lithuania	2023	LT23	NW055	NW055_GEN300_R2	2	2	15	9	58	69.67	102	281.24	42	14.4	77.5	544.1	525080
Lithuania	2023	LT23	NW056	NW056_GEN300_R1	1	1	16	3	54	86	101	369.77	36.8	14.8	80.5	483.4	432726
Lithuania	2023	LT23	NW056	NW056_GEN300_R2	2	2	18	14	54	80	101	297.39	36.4	15.3	81.4	483.4	432726
Lithuania	2023	LT23	NW057	NW057_GEN300_R1	1	1	17	3	54	73.33	101	459.73	35.6	12.8	80.9	483.4	432726
Lithuania	2023	LT23	NW057	NW057_GEN300_R2	2	2	19	15	54	68	101	298.44	35.2	13.3	81.5	483.4	432726
Lithuania	2023	LT23	NW058	NW058_GEN300_R1	1	1	18	3	55	63.33	101	370.53	34	14.3	81.7	500.6	456869
Lithuania	2023	LT23	NW058	NW058_GEN300_R2	2	2	12	8	54	53.67	101	362.92	34	14.9	81.9	483.4	432726
Lithuania	2023	LT23	NW059	NW059_GEN300_R1	1	1	19	3	53	67.33	101	437.19	35.2	13.9	80.5	466.7	409623
Lithuania	2023	LT23	NW059	NW059_GEN300_R2	2	2	2	4	54	69.67	101	374.71	34.8	14.2	79.8	483.4	432726
Lithuania	2023	LT23	NW060	NW060_GEN300_R1	1	1	20	3	55	64.67	101	442.06	35.2	13.9	80	500.6	456869
Lithuania	2023	LT23	NW060	NW060_GEN300_R2	2	2	6	15	55	58	101	253.92	35.6	14.2	80.4	500.6	456869
Lithuania	2023	LT23	NW061	NW061_GEN300_R1	1	1	1	4	54	59.33	101	384.74	40	13.2	80.7	483.4	432726
Lithuania	2023	LT23	NW061	NW061_GEN300_R2	2	2	10	3	55	55.67	101	264.9	39.6	14	80.7	500.6	456869
Lithuania	2023	LT23	NW062	NW062_GEN300_R1	1	1	2	4	52	66.67	101	352.72	36.8	13.8	81.3	450.35	387406
Lithuania	2023	LT23	NW062	NW062_GEN300_R2	2	2	2	7	54	58	101	234.11	36.4	14.9	80.5	483.4	432726
Lithuania	2023	LT23	NW063	NW063_GEN300_R1	1	1	3	4	53	61.33	101	390.39	38.4	14.9	79.9	466.7	409623
Lithuania	2023	LT23	NW063	NW063_GEN300_R2	2	2	6	7	55	55.33	101	366.95	37.2	14.4	79.6	500.6	456869
Lithuania	2023	LT23	NW064	NW064_GEN300_R1	1	1	4	4	55	64	101	356.2	39.2	14.4	79.1	500.6	456869
Lithuania	2023	LT23	NW064	NW064_GEN300_R2	2	2	20	1	55	61.67	101	325.77	38.8	14.1	79.5	500.6	456869
Lithuania	2023	LT23	NW065	NW065_GEN300_R1	1	1	5	4	55	72.67	101	335.84	38.8	14.5	80.8	500.6	456869
Lithuania	2023	LT23	NW065	NW065_GEN300_R2	2	2	9	15	54	67.33	101	252.57	39.6	15.4	81.1	483.4	432726
Lithuania	2023	LT23	NW066	NW066_GEN300_R1	1	1	6	4	51	62	101	193.86	33.2	17.6	77.1	435.3	366859
Lithuania	2023	LT23	NW066	NW066_GEN300_R2	2	2	15	11	53	61.67	101	203.36	34	17.7	77.1	466.7	409623
Lithuania	2023	LT23	NW067	NW067_GEN300_R1	1	1	7	4	52	67	101	334.52	34.8	14.9	79	450.35	387406
Lithuania	2023	LT23	NW067	NW067_GEN300_R2	2	2	1	6	54	61	101	157.84	35.6	15	75.9	483.4	432726
Lithuania	2023	LT23	NW068	NW068_GEN300_R1	1	1	8	4	57	66	102	444.57	40.4	13.2	80.4	529.85	502076
Lithuania	2023	LT23	NW068	NW068_GEN300_R2	2	2	20	7	58	69.33	102	346.18	40.8	13.5	80	544.1	525080
Lithuania	2023	LT23	NW069	NW069_GEN300_R1	1	1	9	4	55	69.67	101	326.79	35.2	14.5	82	500.6	456869
Lithuania	2023	LT23	NW069	NW069_GEN300_R2	2	2	8	14	55	65	101	152.99	34.8	15.1	77.4	500.6	456869
Lithuania	2023	LT23	NW070	NW070_GEN300_R1	1	1	10	4	55	68	101	425.96	44.8	13.7	81.1	500.6	456869
Lithuania	2023	LT23	NW070	NW070_GEN300_R2	2	2	8	12	54	65	101	282	43.2	14.4	80	483.4	432726
Lithuania	2023	LT23	NW071	NW071_GEN300_R1	1	1	11	4	55	67.67	102	432.98	49.2	13.5	81.3	500.6	456869
Lithuania	2023	LT23	NW071	NW071_GEN300_R2	2	2	17	14	54	70.33	102	394.65	50.4	13.4	82.3	483.4	432726
Lithuania	2023	LT23	NW072	NW072_GEN300_R1	1	1	12	4	56	71	102	350.48	41.6	13.9	79	514.45	478497
Lithuania	2023	LT23	NW072	NW072_GEN300_R2	2	2	12	14	55	65.33	102	275.73	39.6	15.9	79.3	500.6	456869
Lithuania	2023	LT23	NW073	NW073_GEN300_R1	1	1	13	4	56	64.67	101	369.95	39.6	13.8	77.8	514.45	478497
Lithuania	2023	LT23	NW073	NW073_GEN300_R2	2	2	2	3	55	69.67	101	419.57	39.2	14.5	79.3	500.6	456869
Lithuania	2023	LT23	NW074	NW074_GEN300_R1	1	1	14	4	54	68.67	103	439.49	45.2	12.6	80.8	483.4	432726
Lithuania	2023	LT23	NW074	NW074_GEN300_R2	2	2	19	9	54	66.33	102	318.49	44.4	13.4	81.1	483.4	432726
Lithuania	2023	LT23	NW075	NW075_GEN300_R1	1	1	15	4	55	65	101	524.9	44.8	12.8	81.2	500.6	456869
Lithuania	2023	LT23	NW075	NW075_GEN300_R2	2	2	15	14	53	68.67	101	398.48	44.4	13	81.8	466.7	409623
Lithuania	2023	LT23	NW076	NW076_GEN300_R1	1	1	16	4	57	82.33	102	452.91	40	12.7	79	529.85	502076
Lithuania	2023	LT23	NW076	NW076_GEN300_R2	2	2	19	5	58	79	102	369.36	41.2	14	80.3	544.1	525080
Lithuania	2023	LT23	NW077	NW077_GEN300_R1	1	1	17	4	56	67.67	101	380.38	40.4	13.9	80.6	514.45	478497
Lithuania	2023	LT23	NW077	NW077_GEN300_R2	2	2	17	12	55	66	101	452.91	40.8	13	82.2	500.6	456869
Lithuania	2023	LT23	NW078	NW078_GEN300_R1	1	1	18	4	55	66.33	101	226.84	31.2	16	78.5	500.6	456869
Lithuania	2023	LT23	NW078	NW078_GEN300_R2	2	2	11	3	55	61.67	101	190.88	31.2	16.2	78.4	500.6	456869
Lithuania	2023	LT23	NW079	NW079_GEN300_R1	1	1	19	4	53	75	101	384.92	42	13.5	79.2	466.7	409623
Lithuania	2023	LT23	NW079	NW079_GEN300_R2	2	2	19	6	53	71	101	287.92	40	13.9	79.2	466.7	409623
Lithuania	2023	LT23	NW080	NW080_GEN300_R1	1	1	20	4	55	71.67	101	354.89	36.4	13.8	77.7	500.6	456869
Lithuania	2023	LT23	NW080	NW080_GEN300_R2	2	2	15	6	55	72	101	340.02	37.2	13.5	77.4	500.6	456869
Lithuania	2023	LT23	NW081	NW081_GEN300_R1	1	1	1	5	53	71	101	388.35	47.6	13.1	80	466.7	409623
Lithuania	2023	LT23	NW081	NW081_GEN300_R2	2	2	6	2	53	69.67	101	372.23	48.4	13.1	80.2	466.7	409623
Lithuania	2023	LT23	NW082	NW082_GEN300_R1	1	1	2	5	53	67.33	101	354.7	44	14.1	80	466.7	409623
Lithuania	2023	LT23	NW082	NW082_GEN300_R2	2	2	12	4	54	72	101	393.92	43.2	15	79.8	483.4	432726
Lithuania	2023	LT23	NW083	NW083_GEN300_R1	1	1	3	5	52	65.33	101	360.03	49.2	14.4	81.4	450.35	387406
Lithuania	2023	LT23	NW083	NW083_GEN300_R2	2	2	16	15	52	66.67	101	228.46	48	14.8	82.4	450.35	387406
Lithuania	2023	LT23	NW084	NW084_GEN300_R1	1	1	4	5	54	66	101	376.23	40.8	14.7	81.2	483.4	432726
Lithuania	2023	LT23	NW084	NW084_GEN300_R2	2	2	20	12	53	70.33	101	378.16	41.2	15	82.4	466.7	409623
Lithuania	2023	LT23	NW085	NW085_GEN300_R1	1	1	5	5	58	65.33	101	353.1	44	12.4	80.5	544.1	525080
Lithuania	2023	LT23	NW085	NW085_GEN300_R2	2	2	4	7	59	61.67	101	290.47	43.2	13	78.8	556.25	546514
Lithuania	2023	LT23	NW086	NW086_GEN300_R1	1	1	6	5	52	65.33	101	373.72	43.6	13.5	81	450.35	387406
Lithuania	2023	LT23	NW086	NW086_GEN300_R2	2	2	5	10	53	64	101	400.69	43.2	14.2	81.6	466.7	409623
Lithuania	2023	LT23	NW087	NW087_GEN300_R1	1	1	7	5	52	68.67	101	306.98	35.6	13.4	78.9	450.35	387406
Lithuania	2023	LT23	NW087	NW087_GEN300_R2	2	2	4	11	55	71.67	101	356.87	35.2	13.6	78.7	500.6	456869
Lithuania	2023	LT23	NW088	NW088_GEN300_R1	1	1	8	5	52	86.67	101	277.55	36.8	16.3	80.2	450.35	387406
Lithuania	2023	LT23	NW088	NW088_GEN300_R2	2	2	8	15	52	78.33	101	179.41	36.4	17.5	79.7	450.35	387406
Lithuania	2023	LT23	NW089	NW089_GEN300_R1	1	1	9	5	52	70.67	101	357.26	35.2	13.8	79.3	450.35	387406
Lithuania	2023	LT23	NW089	NW089_GEN300_R2	2	2	6	13	53	61.67	101	199.06	36	15.7	78.2	466.7	409623
Lithuania	2023	LT23	NW090	NW090_GEN300_R1	1	1	10	5	54	80	101	387.3	36	12.9	82.2	483.4	432726
Lithuania	2023	LT23	NW090	NW090_GEN300_R2	2	2	1	15	54	79.67	101	299.62	36.4	15.9	78.4	483.4	432726
Lithuania	2023	LT23	NW091	NW091_GEN300_R1	1	1	11	5	58	70	102	421.41	40	14.1	78.1	544.1	525080
Lithuania	2023	LT23	NW091	NW091_GEN300_R2	2	2	7	9	58	63	102	252.01	42	15.4	77.9	544.1	525080
Lithuania	2023	LT23	NW092	NW092_GEN300_R1	1	1	12	5	53	71.33	101	283.88	38	14.7	80.1	466.7	409623
Lithuania	2023	LT23	NW092	NW092_GEN300_R2	2	2	8	7	54	72.33	101	260.61	38.4	15.4	79.7	483.4	432726
Lithuania	2023	LT23	NW093	NW093_GEN300_R1	1	1	13	5	55	60.33	101	400.69	38	12.2	78	500.6	456869
Lithuania	2023	LT23	NW093	NW093_GEN300_R2	2	2	15	2	56	65.33	101	460.32	37.2	12.7	78.4	514.45	478497
Lithuania	2023	LT23	NW094	NW094_GEN300_R1	1	1	14	5	54	81	101	430.7	39.6	13.2	81.3	483.4	432726
Lithuania	2023	LT23	NW094	NW094_GEN300_R2	2	2	17	7	54	77	101	417.24	40.4	13.2	82.1	483.4	432726
Lithuania	2023	LT23	NW095	NW095_GEN300_R1	1	1	15	5	52	61.33	101	297.39	36.8	14.2	80.4	450.35	387406
Lithuania	2023	LT23	NW095	NW095_GEN300_R2	2	2	15	15	51	56.33	101	286.01	36.8	15.3	82.5	435.3	366859
Lithuania	2023	LT23	NW096	NW096_GEN300_R1	1	1	16	5	57	68.33	103	309.81	36.4	14.2	78.4	529.85	502076
Lithuania	2023	LT23	NW096	NW096_GEN300_R2	2	2	5	5	58	71	103	356.87	35.6	14.3	78.9	544.1	525080
Lithuania	2023	LT23	NW097	NW097_GEN300_R1	1	1	17	5	57	70.33	101	338.24	38.8	14.1	76	529.85	502076
Lithuania	2023	LT23	NW097	NW097_GEN300_R2	2	2	13	8	56	65.67	101	447.56	38.4	12.8	77.9	514.45	478497
Lithuania	2023	LT23	NW098	NW098_GEN300_R1	1	1	18	5	58	70.67	101	404.48	37.2	12.4	79.1	544.1	525080
Lithuania	2023	LT23	NW098	NW098_GEN300_R2	2	2	15	8	56	62.33	101	427.38	37.2	11.8	80.9	514.45	478497
Lithuania	2023	LT23	NW099	NW099_GEN300_R1	1	1	19	5	56	70	101	386.44	42.8	13.7	75.9	514.45	478497
Lithuania	2023	LT23	NW099	NW099_GEN300_R2	2	2	12	3	56	61	101	290.15	40.8	14	76.1	514.45	478497
Lithuania	2023	LT23	NW100	NW100_GEN300_R1	1	1	20	5	55	76	101	292.36	37.2	14.4	79.1	500.6	456869
Lithuania	2023	LT23	NW100	NW100_GEN300_R2	2	2	7	15	55	71.33	101	292.82	36.4	14.4	81	500.6	456869
Lithuania	2023	LT23	NW101	NW101_GEN300_R1	1	1	1	6	57	71.33	101	404.83	38	12.9	79.1	529.85	502076
Lithuania	2023	LT23	NW101	NW101_GEN300_R2	2	2	9	13	58	60	102	193.44	39.2	15.2	78.4	544.1	525080
Lithuania	2023	LT23	NW102	NW102_GEN300_R1	1	1	2	6	55	69.33	101	353.53	36	14.2	78.3	500.6	456869
Lithuania	2023	LT23	NW102	NW102_GEN300_R2	2	2	1	1	55	68	101	360.81	35.6	15	77	500.6	456869
Lithuania	2023	LT23	NW103	NW103_GEN300_R1	1	1	3	6	53	76.67	101	393.86	36.4	15	81.2	466.7	409623
Lithuania	2023	LT23	NW103	NW103_GEN300_R2	2	2	6	3	53	71.67	101	292.39	36	15.1	79.6	466.7	409623
Lithuania	2023	LT23	NW104	NW104_GEN300_R1	1	1	4	6	54	65	101	400.25	46.8	14.6	81.9	483.4	432726
Lithuania	2023	LT23	NW104	NW104_GEN300_R2	2	2	20	3	55	71.33	103	322.29	45.6	14.8	81.7	500.6	456869
Lithuania	2023	LT23	NW105	NW105_GEN300_R1	1	1	5	6	52	67.33	101	335.16	38.4	14	79	450.35	387406
Lithuania	2023	LT23	NW105	NW105_GEN300_R2	2	2	18	7	54	71.67	101	389	38	14.1	79.7	483.4	432726
Lithuania	2023	LT23	NW106	NW106_GEN300_R1	1	1	6	6	52	78.67	101	278.94	42.4	15.9	80.8	450.35	387406
Lithuania	2023	LT23	NW106	NW106_GEN300_R2	2	2	1	14	52	68	101	228.73	43.2	15.7	79.6	450.35	387406
Lithuania	2023	LT23	NW107	NW107_GEN300_R1	1	1	7	6	52	66	101	365.58	38.8	15.3	78.7	450.35	387406
Lithuania	2023	LT23	NW107	NW107_GEN300_R2	2	2	6	6	53	73	101	328.59	39.2	15.3	77.2	466.7	409623
Lithuania	2023	LT23	NW108	NW108_GEN300_R1	1	1	8	6	53	71	101	391.55	40	14	80.3	466.7	409623
Lithuania	2023	LT23	NW108	NW108_GEN300_R2	2	2	13	1	53	64.67	101	280.48	39.6	15.6	79.3	466.7	409623
Lithuania	2023	LT23	NW109	NW109_GEN300_R1	1	1	9	6	53	74.33	101	359.61	38	14.4	79.7	466.7	409623
Lithuania	2023	LT23	NW109	NW109_GEN300_R2	2	2	10	12	55	70.33	101	330.87	37.6	15.9	80.3	500.6	456869
Lithuania	2023	LT23	NW110	NW110_GEN300_R1	1	1	10	6	54	76.33	101	387.72	42	15.1	80.2	483.4	432726
Lithuania	2023	LT23	NW110	NW110_GEN300_R2	2	2	5	11	55	69.67	101	347.18	42	14.9	80	500.6	456869
Lithuania	2023	LT23	NW111	NW111_GEN300_R1	1	1	11	6	54	70.33	101	451.6	40.4	14	81.7	483.4	432726
Lithuania	2023	LT23	NW111	NW111_GEN300_R2	2	2	14	14	53	72.33	101	321.22	39.2	14.9	80.5	466.7	409623
Lithuania	2023	LT23	NW112	NW112_GEN300_R1	1	1	12	6	55	72	102	394.21	36.4	13.7	79.9	500.6	456869
Lithuania	2023	LT23	NW112	NW112_GEN300_R2	2	2	8	5	55	68	102	295.27	35.6	14.5	80.1	500.6	456869
Lithuania	2023	LT23	NW113	NW113_GEN300_R1	1	1	13	6	55	72.67	101	376.64	42.4	13.3	78.6	500.6	456869
Lithuania	2023	LT23	NW113	NW113_GEN300_R2	2	2	17	5	55	66.67	101	318.84	41.6	13.4	79.2	500.6	456869
Lithuania	2023	LT23	NW114	NW114_GEN300_R1	1	1	14	6	53	74.33	101	290.47	38.4	16.5	79.7	466.7	409623
Lithuania	2023	LT23	NW114	NW114_GEN300_R2	2	2	7	3	53	72.33	101	230.99	38.4	16.3	79.6	466.7	409623
Lithuania	2023	LT23	NW115	NW115_GEN300_R1	1	1	15	6	52	72	101	330.29	41.2	14.1	78.9	450.35	387406
Lithuania	2023	LT23	NW115	NW115_GEN300_R2	2	2	5	3	52	67.67	101	317.09	40	14.7	78.8	450.35	387406
Lithuania	2023	LT23	NW116	NW116_GEN300_R1	1	1	16	6	55	70.67	101	278.16	34.8	16.6	77.9	500.6	456869
Lithuania	2023	LT23	NW116	NW116_GEN300_R2	2	2	19	3	55	73	101	254.79	34	17	78.4	500.6	456869
Lithuania	2023	LT23	NW117	NW117_GEN300_R1	1	1	17	6	53	69	101	316.4	38	14.3	79.6	466.7	409623
Lithuania	2023	LT23	NW117	NW117_GEN300_R2	2	2	2	5	54	66.67	101	411.76	40	14.6	81.6	483.4	432726
Lithuania	2023	LT23	NW118	NW118_GEN300_R1	1	1	18	6	54	75	101	263.67	38.4	15.5	78.5	483.4	432726
Lithuania	2023	LT23	NW118	NW118_GEN300_R2	2	2	9	2	53	73.67	101	318.79	36.4	15.3	79	466.7	409623
Lithuania	2023	LT23	NW119	NW119_GEN300_R1	1	1	19	6	52	72.33	101	345.4	39.6	14.9	79.8	450.35	387406
Lithuania	2023	LT23	NW119	NW119_GEN300_R2	2	2	18	8	52	61	101	214.83	38.4	15.5	79.3	450.35	387406
Lithuania	2023	LT23	NW120	NW120_GEN300_R1	1	1	20	6	55	68.67	101	261.36	38.8	15	77.6	500.6	456869
Lithuania	2023	LT23	NW120	NW120_GEN300_R2	2	2	3	11	55	61.33	101	275.12	38.4	14.9	79.1	500.6	456869
Lithuania	2023	LT23	NW121	NW121_GEN300_R1	1	1	1	7	53	71.67	101	371.1	35.6	15.4	80.4	466.7	409623
Lithuania	2023	LT23	NW121	NW121_GEN300_R2	2	2	14	12	53	71.33	101	288.24	35.6	16.8	78.1	466.7	409623
Lithuania	2023	LT23	NW122	NW122_GEN300_R1	1	1	2	7	52	68	101	400.69	39.6	14.7	79.4	450.35	387406
Lithuania	2023	LT23	NW122	NW122_GEN300_R2	2	2	9	11	52	72.67	101	368.5	40.8	14.9	79.2	450.35	387406
Lithuania	2023	LT23	NW123	NW123_GEN300_R1	1	1	3	7	55	74.67	101	502.93	42	13.8	79.8	500.6	456869
Lithuania	2023	LT23	NW123	NW123_GEN300_R2	2	2	12	10	55	72.67	101	425.96	40.8	14.1	79.1	500.6	456869
Lithuania	2023	LT23	NW124	NW124_GEN300_R1	1	1	4	7	55	74	101	419.57	39.2	14.7	79.5	500.6	456869
Lithuania	2023	LT23	NW124	NW124_GEN300_R2	2	2	10	11	55	75.33	101	381.99	39.6	14	79.8	500.6	456869
Lithuania	2023	LT23	NW125	NW125_GEN300_R1	1	1	5	7	54	69.67	101	415.87	41.6	14.9	80.1	483.4	432726
Lithuania	2023	LT23	NW125	NW125_GEN300_R2	2	2	6	12	55	70.67	101	265.78	40.4	15.9	79.7	500.6	456869
Lithuania	2023	LT23	NW126	NW126_GEN300_R1	1	1	6	7	55	80.33	101	440.82	40.4	14	79.7	500.6	456869
Lithuania	2023	LT23	NW126	NW126_GEN300_R2	2	2	11	15	53	67.33	101	260.21	40	15.1	78.9	466.7	409623
Lithuania	2023	LT23	NW127	NW127_GEN300_R1	1	1	7	7	55	71.67	101	380.93	39.6	13.9	79	500.6	456869
Lithuania	2023	LT23	NW127	NW127_GEN300_R2	2	2	16	8	55	61.33	101	251.43	38.4	15.1	79	500.6	456869
Lithuania	2023	LT23	NW128	NW128_GEN300_R1	1	1	8	7	55	72	101	368.74	39.6	14.1	78.1	500.6	456869
Lithuania	2023	LT23	NW128	NW128_GEN300_R2	2	2	12	11	55	68.33	101	351.94	38	15.2	78.8	500.6	456869
Lithuania	2023	LT23	NW129	NW129_GEN300_R1	1	1	9	7	55	70.33	101	327.51	36.8	14.1	78.5	500.6	456869
Lithuania	2023	LT23	NW129	NW129_GEN300_R2	2	2	9	10	55	65.67	101	344.66	35.6	14.9	80	500.6	456869
Lithuania	2023	LT23	NW130	NW130_GEN300_R1	1	1	10	7	55	77	101	337.23	37.2	14.8	78.6	500.6	456869
Lithuania	2023	LT23	NW130	NW130_GEN300_R2	2	2	5	13	56	65.33	101	201.06	36.4	15.7	78.6	514.45	478497
Lithuania	2023	LT23	NW131	NW131_GEN300_R1	1	1	11	7	55	64.33	101	431.51	41.2	15.1	80.6	500.6	456869
Lithuania	2023	LT23	NW131	NW131_GEN300_R2	2	2	10	15	53	64	101	306.08	40.4	14.6	80.7	466.7	409623
Lithuania	2023	LT23	NW132	NW132_GEN300_R1	1	1	12	7	55	79.67	101	365.74	42.4	14.8	80.2	500.6	456869
Lithuania	2023	LT23	NW132	NW132_GEN300_R2	2	2	13	14	53	66.67	101	203.14	42.8	16.5	79.2	466.7	409623
Lithuania	2023	LT23	NW133	NW133_GEN300_R1	1	1	13	7	55	72.67	101	386.44	41.2	15.4	80.9	500.6	456869
Lithuania	2023	LT23	NW133	NW133_GEN300_R2	2	2	5	9	56	66.33	101	252.02	40.8	16	80.9	514.45	478497
Lithuania	2023	LT23	NW134	NW134_GEN300_R1	1	1	14	7	55	73	102	387.72	37.2	14	81.5	500.6	456869
Lithuania	2023	LT23	NW134	NW134_GEN300_R2	2	2	9	9	55	73.67	102	394.46	37.2	14.1	81.9	500.6	456869
Lithuania	2023	LT23	NW135	NW135_GEN300_R1	1	1	15	7	54	69.33	102	347.56	37.6	14.3	80.3	483.4	432726
Lithuania	2023	LT23	NW135	NW135_GEN300_R2	2	2	4	3	53	67.67	101	393.6	37.6	14.9	80.2	466.7	409623
Lithuania	2023	LT23	NW136	NW136_GEN300_R1	1	1	16	7	55	67.33	101	315.72	40	14.9	78.6	500.6	456869
Lithuania	2023	LT23	NW136	NW136_GEN300_R2	2	2	5	4	57	56	101	290.79	39.2	15.7	79.4	529.85	502076
Lithuania	2023	LT23	NW137	NW137_GEN300_R1	1	1	17	7	59	71	101	323.67	38.8	14.9	80.3	556.25	546514
Lithuania	2023	LT23	NW137	NW137_GEN300_R2	2	2	10	4	59	68.33	101	274.35	38.4	14.7	78.7	556.25	546514
Lithuania	2023	LT23	NW138	NW138_GEN300_R1	1	1	18	7	60	61.67	101	293.97	37.6	14.4	79.2	568.5	568467
Lithuania	2023	LT23	NW138	NW138_GEN300_R2	2	2	4	6	59	63	101	363.99	36.4	14.3	79.3	556.25	546514
Lithuania	2023	LT23	NW139	NW139_GEN300_R1	1	1	19	7	55	79	101	332.25	42	13.6	81	500.6	456869
Lithuania	2023	LT23	NW139	NW139_GEN300_R2	2	2	14	7	54	70	101	386.71	40.4	13.2	80.4	483.4	432726
Lithuania	2023	LT23	NW140	NW140_GEN300_R1	1	1	20	7	55	71.33	101	236.6	40.8	14.8	78.9	500.6	456869
Lithuania	2023	LT23	NW140	NW140_GEN300_R2	2	2	10	6	54	81.67	101	430.09	40.8	13.9	81.1	483.4	432726
Lithuania	2023	LT23	NW141	NW141_GEN300_R1	1	1	1	8	56	76.67	101	442.14	42.8	13.3	81.2	514.45	478497
Lithuania	2023	LT23	NW141	NW141_GEN300_R2	2	2	16	2	56	82	101	417.26	44	13.8	80.8	514.45	478497
Lithuania	2023	LT23	NW142	NW142_GEN300_R1	1	1	2	8	59	68.67	102	449.93	39.6	13.3	77.8	556.25	546514
Lithuania	2023	LT23	NW142	NW142_GEN300_R2	2	2	17	15	57	64	102	360.03	38.4	13.2	78.8	529.85	502076
Lithuania	2023	LT23	NW143	NW143_GEN300_R1	1	1	3	8	57	72.33	101	437.03	38.4	13.5	79.9	529.85	502076
Lithuania	2023	LT23	NW143	NW143_GEN300_R2	2	2	2	11	58	68.67	101	310.88	38.8	14	79	544.1	525080
Lithuania	2023	LT23	NW144	NW144_GEN300_R1	1	1	4	8	55	77.67	101	432.42	45.2	13.8	80	500.6	456869
Lithuania	2023	LT23	NW144	NW144_GEN300_R2	2	2	6	1	56	71.67	101	386.64	45.6	13.2	78.5	514.45	478497
Lithuania	2023	LT23	NW145	NW145_GEN300_R1	1	1	5	8	52	61.33	101	469.25	39.6	12.2	81.4	450.35	387406
Lithuania	2023	LT23	NW145	NW145_GEN300_R2	2	2	3	9	53	63	101	336.49	39.2	12.6	81.7	466.7	409623
Lithuania	2023	LT23	NW146	NW146_GEN300_R1	1	1	6	8	55	68.33	101	474.58	40	14	80.1	500.6	456869
Lithuania	2023	LT23	NW146	NW146_GEN300_R2	2	2	14	1	53	63.33	101	366.47	38.8	15.1	78.9	466.7	409623
Lithuania	2023	LT23	NW147	NW147_GEN300_R1	1	1	7	8	52	64	101	407.06	48	14.3	81.1	450.35	387406
Lithuania	2023	LT23	NW147	NW147_GEN300_R2	2	2	20	2	54	67	101	383.26	47.6	14.2	80.5	483.4	432726
Lithuania	2023	LT23	NW148	NW148_GEN300_R1	1	1	8	8	54	99.33	101	288.84	47.6	14.4	80.8	483.4	432726
Lithuania	2023	LT23	NW148	NW148_GEN300_R2	2	2	3	5	55	97	101	283.37	46.4	15.1	79.4	500.6	456869
Lithuania	2023	LT23	NW149	NW149_GEN300_R1	1	1	9	8	54	82.33	101	491.27	40	13.4	80.3	483.4	432726
Lithuania	2023	LT23	NW149	NW149_GEN300_R2	2	2	10	14	55	71.67	101	314.55	40	14.1	80.3	500.6	456869
Lithuania	2023	LT23	NW150	NW150_GEN300_R1	1	1	10	8	53	80	101	488.34	51.2	13.4	80.6	466.7	409623
Lithuania	2023	LT23	NW150	NW150_GEN300_R2	2	2	13	15	52	73.67	101	312.54	50.4	14.1	79.9	450.35	387406
Lithuania	2023	LT23	NW151	NW151_GEN300_R1	1	1	11	8	53	74.33	101	405.28	38.8	14	80.1	466.7	409623
Lithuania	2023	LT23	NW151	NW151_GEN300_R2	2	2	8	2	53	71.67	101	271.59	37.2	13.3	79.4	466.7	409623
Lithuania	2023	LT23	NW152	NW152_GEN300_R1	1	1	12	8	57	68.33	101	367.12	37.6	13.8	77.7	529.85	502076
Lithuania	2023	LT23	NW152	NW152_GEN300_R2	2	2	6	5	57	67.33	101	395.67	36.4	13.4	76.7	529.85	502076
Lithuania	2023	LT23	NW153	NW153_GEN300_R1	1	1	13	8	54	67.67	101	412.13	39.6	14.1	79.5	483.4	432726
Lithuania	2023	LT23	NW153	NW153_GEN300_R2	2	2	16	6	55	71.67	101	330.14	38	14.7	78.7	500.6	456869
Lithuania	2023	LT23	NW154	NW154_GEN300_R1	1	1	14	8	54	73.67	101	410.78	44.4	13.2	80.5	483.4	432726
Lithuania	2023	LT23	NW154	NW154_GEN300_R2	2	2	9	1	53	64.33	101	437.57	44.8	13.7	80.8	466.7	409623
Lithuania	2023	LT23	NW155	NW155_GEN300_R1	1	1	15	8	56	70.67	101	333.06	39.2	13.5	79.4	514.45	478497
Lithuania	2023	LT23	NW155	NW155_GEN300_R2	2	2	10	2	57	76	102	310.89	38.4	14.5	79.5	529.85	502076
Lithuania	2023	LT23	NW156	NW156_GEN300_R1	1	1	16	8	55	71.33	101	315.01	40.8	13.3	77.9	500.6	456869
Lithuania	2023	LT23	NW156	NW156_GEN300_R2	2	2	20	4	56	63.67	101	205.64	39.6	15.4	76.8	514.45	478497
Lithuania	2023	LT23	NW157	NW157_GEN300_R1	1	1	17	8	58	63	101	300.41	36.8	14.7	78.6	544.1	525080
Lithuania	2023	LT23	NW157	NW157_GEN300_R2	2	2	11	12	57	65.33	101	368.1	35.6	14.6	80	529.85	502076
Lithuania	2023	LT23	NW158	NW158_GEN300_R1	1	1	18	8	63	66	110	264.21	36.8	14.6	74.4	613.35	645368
Lithuania	2023	LT23	NW158	NW158_GEN300_R2	2	2	18	13	60	70	108	400.85	35.2	13.7	78.9	568.5	568467
Lithuania	2023	LT23	NW159	NW159_GEN300_R1	1	1	19	8	62	67.67	109	260.21	36	14	75.8	597.75	618550
Lithuania	2023	LT23	NW159	NW159_GEN300_R2	2	2	8	9	62	69.33	107	391.88	36	13.5	77.7	597.75	618550
Lithuania	2023	LT23	NW160	NW160_GEN300_R1	1	1	20	8	56	67	101	216.79	44.4	14.3	79	514.45	478497
Lithuania	2023	LT23	NW160	NW160_GEN300_R2	2	2	6	4	56	67.67	101	332.62	44.8	14.6	79.2	514.45	478497
Lithuania	2023	LT23	NW161	NW161_GEN300_R1	1	1	1	9	55	62.33	101	231.61	38	15.2	78.6	500.6	456869
Lithuania	2023	LT23	NW161	NW161_GEN300_R2	2	2	1	4	55	71	101	319.49	38.4	14.7	78.2	500.6	456869
Lithuania	2023	LT23	NW162	NW162_GEN300_R1	1	1	2	9	56	61.67	101	215.97	37.6	14.8	78.9	514.45	478497
Lithuania	2023	LT23	NW162	NW162_GEN300_R2	2	2	19	12	54	71.33	102	326.44	37.2	15.1	80.2	483.4	432726
Lithuania	2023	LT23	NW163	NW163_GEN300_R1	1	1	3	9	55	71	101	284.23	38.8	14.9	79.3	500.6	456869
Lithuania	2023	LT23	NW163	NW163_GEN300_R2	2	2	12	1	58	70.33	101	278.63	38.4	15	77.9	544.1	525080
Lithuania	2023	LT23	NW164	NW164_GEN300_R1	1	1	4	9	58	75	101	351.38	38.4	14	80.1	544.1	525080
Lithuania	2023	LT23	NW164	NW164_GEN300_R2	2	2	5	14	60	66.33	101	198.67	38.4	15.7	77.9	568.5	568467
Lithuania	2023	LT23	NW165	NW165_GEN300_R1	1	1	5	9	58	71.67	101	369.88	38.4	13.2	80.1	544.1	525080
Lithuania	2023	LT23	NW165	NW165_GEN300_R2	2	2	7	11	57	74	101	399.74	38.4	13.5	80.8	529.85	502076
Lithuania	2023	LT23	NW166	NW166_GEN300_R1	1	1	6	9	57	73.33	101	372.73	39.2	13.1	80.3	529.85	502076
Lithuania	2023	LT23	NW166	NW166_GEN300_R2	2	2	10	5	58	72	101	384.64	38.8	13.7	79.6	544.1	525080
Lithuania	2023	LT23	NW167	NW167_GEN300_R1	1	1	7	9	54	75.67	101	348.08	40.4	14.2	79.7	483.4	432726
Lithuania	2023	LT23	NW167	NW167_GEN300_R2	2	2	17	11	56	72.67	101	277.86	39.6	14.6	79.3	514.45	478497
Lithuania	2023	LT23	NW168	NW168_GEN300_R1	1	1	8	9	59	78.67	101	377.16	38.4	12.7	79.7	556.25	546514
Lithuania	2023	LT23	NW168	NW168_GEN300_R2	2	2	1	7	61	62	102	142	37.6	15.2	75.6	582.05	592164
Lithuania	2023	LT23	NW169	NW169_GEN300_R1	1	1	9	9	59	79.33	102	391.1	40	13.6	78	556.25	546514
Lithuania	2023	LT23	NW169	NW169_GEN300_R2	2	2	16	7	58	76.33	102	419.07	39.2	13.2	77.4	544.1	525080
Lithuania	2023	LT23	NW170	NW170_GEN300_R1	1	1	10	9	55	70.67	101	318.49	38.4	15.1	80.1	500.6	456869
Lithuania	2023	LT23	NW170	NW170_GEN300_R2	2	2	11	13	54	66.33	101	302.63	37.6	15.2	79.6	483.4	432726
Lithuania	2023	LT23	NW171	NW171_GEN300_R1	1	1	11	9	55	65.67	102	300.41	37.2	14.8	79.5	500.6	456869
Lithuania	2023	LT23	NW171	NW171_GEN300_R2	2	2	8	6	55	73	102	352.72	36.8	13.7	79.1	500.6	456869
Lithuania	2023	LT23	NW172	NW172_GEN300_R1	1	1	12	9	55	70	101	240.61	36.4	15.2	78.5	500.6	456869
Lithuania	2023	LT23	NW172	NW172_GEN300_R2	2	2	2	8	55	70.67	101	210.91	35.2	15.4	77.9	500.6	456869
Lithuania	2023	LT23	NW173	NW173_GEN300_R1	1	1	13	9	55	65	101	135.55	35.6	16.5	77.7	500.6	456869
Lithuania	2023	LT23	NW173	NW173_GEN300_R2	2	2	5	2	54	65.33	101	276.03	36.4	15	80	483.4	432726
Lithuania	2023	LT23	NW174	NW174_GEN300_R1	1	1	14	9	55	64	101	180.61	39.6	14.9	79.9	500.6	456869
Lithuania	2023	LT23	NW174	NW174_GEN300_R2	2	2	16	9	55	62.67	101	244.86	38.8	15.6	81.3	500.6	456869
Lithuania	2023	LT23	NW175	NW175_GEN300_R1	1	1	15	9	57	64	101	199.1	36.8	14.5	80.1	529.85	502076
Lithuania	2023	LT23	NW175	NW175_GEN300_R2	2	2	9	4	56	66.33	101	206.57	36.8	15	80.3	514.45	478497
Lithuania	2023	LT23	NW176	NW176_GEN300_R1	1	1	16	9	55	64	102	244.25	38	14.8	79.4	500.6	456869
Lithuania	2023	LT23	NW176	NW176_GEN300_R2	2	2	14	6	56	68	102	267.83	38.8	15	79.1	514.45	478497
Lithuania	2023	LT23	NW177	NW177_GEN300_R1	1	1	17	9	55	62.67	102	208.39	39.2	14.7	80.2	500.6	456869
Lithuania	2023	LT23	NW177	NW177_GEN300_R2	2	2	11	10	55	73	103	275.11	38.8	14.6	80	500.6	456869
Lithuania	2023	LT23	NW178	NW178_GEN300_R1	1	1	18	9	55	58.67	101	216.73	40	15	79.7	500.6	456869
Lithuania	2023	LT23	NW178	NW178_GEN300_R2	2	2	18	12	55	70	101	323.62	39.6	14.5	81.1	500.6	456869
Lithuania	2023	LT23	NW179	NW179_GEN300_R1	1	1	19	9	55	73.33	101	274.82	43.2	14.3	80.6	500.6	456869
Lithuania	2023	LT23	NW179	NW179_GEN300_R2	2	2	14	4	56	80	101	327.23	42.8	13.5	79.7	514.45	478497
Lithuania	2023	LT23	NW180	NW180_GEN300_R1	1	1	20	9	54	73.67	101	254.49	40.8	14.6	82.4	483.4	432726
Lithuania	2023	LT23	NW180	NW180_GEN300_R2	2	2	4	10	54	63.67	101	239.7	40.8	14.9	81.8	483.4	432726
Lithuania	2023	LT23	NW181	NW181_GEN300_R1	1	1	1	10	57	66.67	101	251.73	35.2	14.5	77.2	529.85	502076
Lithuania	2023	LT23	NW181	NW181_GEN300_R2	2	2	6	11	57	72.67	101	385.67	34.8	14.2	77.8	529.85	502076
Lithuania	2023	LT23	NW182	NW182_GEN300_R1	1	1	2	10	58	76.33	101	345.8	36.4	13.4	79.7	544.1	525080
Lithuania	2023	LT23	NW182	NW182_GEN300_R2	2	2	15	7	57	73.33	101	373.05	36.4	13.5	79.9	529.85	502076
Lithuania	2023	LT23	NW183	NW183_GEN300_R1	1	1	3	10	54	71.33	101	307.41	38.8	15.1	79.3	483.4	432726
Lithuania	2023	LT23	NW183	NW183_GEN300_R2	2	2	5	12	55	61.33	101	270.32	38	16	78.9	500.6	456869
Lithuania	2023	LT23	NW184	NW184_GEN300_R1	1	1	4	10	55	69.67	101	352.72	38.8	14.5	80.3	500.6	456869
Lithuania	2023	LT23	NW184	NW184_GEN300_R2	2	2	20	14	56	66	101	207.48	37.2	14.5	79.7	514.45	478497
Lithuania	2023	LT23	NW185	NW185_GEN300_R1	1	1	5	10	58	61	101	262.36	35.6	15.2	80.8	544.1	525080
Lithuania	2023	LT23	NW185	NW185_GEN300_R2	2	2	13	7	57	55	101	192.58	35.2	15.5	79.2	529.85	502076
Lithuania	2023	LT23	NW186	NW186_GEN300_R1	1	1	6	10	56	72	101	278.14	35.2	14.9	80.9	514.45	478497
Lithuania	2023	LT23	NW186	NW186_GEN300_R2	2	2	2	9	55	61	101	247.33	35.6	15.5	81.6	500.6	456869
Lithuania	2023	LT23	NW187	NW187_GEN300_R1	1	1	7	10	56	68.33	101	236.34	36.4	15.6	81.2	514.45	478497
Lithuania	2023	LT23	NW187	NW187_GEN300_R2	2	2	11	1	58	61.33	101	310.54	35.2	15.3	80.7	544.1	525080
Lithuania	2023	LT23	NW188	NW188_GEN300_R1	1	1	8	10	55	63.33	101	261.47	35.2	15.3	81.3	500.6	456869
Lithuania	2023	LT23	NW188	NW188_GEN300_R2	2	2	17	9	58	56.33	101	197.06	35.6	15.9	80.2	544.1	525080
Lithuania	2023	LT23	NW189	NW189_GEN300_R1	1	1	9	10	55	73.67	101	466.29	42.4	13.5	81.5	500.6	456869
Lithuania	2023	LT23	NW189	NW189_GEN300_R2	2	2	13	10	55	73	101	414.96	42.8	14.1	81.5	500.6	456869
Lithuania	2023	LT23	NW190	NW190_GEN300_R1	1	1	10	10	55	83	101	301.8	39.6	15.7	80.1	500.6	456869
Lithuania	2023	LT23	NW190	NW190_GEN300_R2	2	2	12	15	54	69	101	271.59	40.4	15.7	79.5	483.4	432726
Lithuania	2023	LT23	NW191	NW191_GEN300_R1	1	1	11	10	57	57	101	219.51	32.4	15.6	80.7	529.85	502076
Lithuania	2023	LT23	NW191	NW191_GEN300_R2	2	2	17	3	56	58	101	221.8	31.6	15.6	81.4	514.45	478497
Lithuania	2023	LT23	NW192	NW192_GEN300_R1	1	1	12	10	59	56	101	122.39	31.6	15.5	79.6	556.25	546514
Lithuania	2023	LT23	NW192	NW192_GEN300_R2	2	2	15	1	57	61.33	101	254.49	30.8	15.3	80.3	529.85	502076
Lithuania	2023	LT23	NW193	NW193_GEN300_R1	1	1	13	10	57	54.33	101	189.15	32	15.1	80.6	529.85	502076
Lithuania	2023	LT23	NW193	NW193_GEN300_R2	2	2	19	8	56	62.33	101	211.17	31.6	15.4	80.5	514.45	478497
Lithuania	2023	LT23	NW194	NW194_GEN300_R1	1	1	14	10	58	50.67	101	200.49	34.4	15.4	79.6	544.1	525080
Lithuania	2023	LT23	NW194	NW194_GEN300_R2	2	2	14	11	56	63.67	101	262.16	33.2	15.1	80.3	514.45	478497
Lithuania	2023	LT23	NW195	NW195_GEN300_R1	1	1	15	10	59	61	102	195.67	33.6	15.6	79.5	556.25	546514
Lithuania	2023	LT23	NW195	NW195_GEN300_R2	2	2	1	11	59	62.33	102	176.47	32.8	15.6	79.4	556.25	546514
Lithuania	2023	LT23	NW196	NW196_GEN300_R1	1	1	16	10	58	60	101	190.33	36.4	15.2	80.6	544.1	525080
Lithuania	2023	LT23	NW196	NW196_GEN300_R2	2	2	7	2	56	62.33	101	288.56	34.4	14.4	80.3	514.45	478497
Lithuania	2023	LT23	NW197	NW197_GEN300_R1	1	1	17	10	56	59.67	101	214.63	36	15.4	81.2	514.45	478497
Lithuania	2023	LT23	NW197	NW197_GEN300_R2	2	2	3	6	56	61.67	101	276.64	36.8	15.1	80.4	514.45	478497
Lithuania	2023	LT23	NW198	NW198_GEN300_R1	1	1	18	10	58	66.67	101	263.96	38.4	14.5	79.9	544.1	525080
Lithuania	2023	LT23	NW198	NW198_GEN300_R2	2	2	11	8	58	68	101	404.43	37.6	13.8	80	544.1	525080
Lithuania	2023	LT23	NW199	NW199_GEN300_R1	1	1	19	10	57	65	101	284.31	42	14.1	79.8	529.85	502076
Lithuania	2023	LT23	NW199	NW199_GEN300_R2	2	2	7	4	58	71	102	328.9	40.8	14	78.4	544.1	525080
Lithuania	2023	LT23	NW200	NW200_GEN300_R1	1	1	20	10	56	66.67	101	220.58	40.4	13.2	79.8	514.45	478497
Lithuania	2023	LT23	NW200	NW200_GEN300_R2	2	2	4	5	59	68	101	386.97	40.4	14.3	79.2	556.25	546514
Lithuania	2023	LT23	NW201	NW201_GEN300_R1	1	1	1	11	58	82	103	446.77	38.8	13.3	78.8	544.1	525080
Lithuania	2023	LT23	NW201	NW201_GEN300_R2	2	2	11	5	60	71.67	103	415.43	37.6	13.8	78.6	568.5	568467
Lithuania	2023	LT23	NW202	NW202_GEN300_R1	1	1	2	11	55	66	101	433.37	37.2	12.7	82.6	500.6	456869
Lithuania	2023	LT23	NW202	NW202_GEN300_R2	2	2	11	7	55	66	101	391.97	36	13.5	81.6	500.6	456869
Lithuania	2023	LT23	NW203	NW203_GEN300_R1	1	1	3	11	59	72	102	518.94	42.8	13	80.1	556.25	546514
Lithuania	2023	LT23	NW203	NW203_GEN300_R2	2	2	17	2	59	68.67	102	424.64	44.8	12.7	79.2	556.25	546514
Lithuania	2023	LT23	NW204	NW204_GEN300_R1	1	1	4	11	53	63.33	101	407.2	46	13.1	81	466.7	409623
Lithuania	2023	LT23	NW204	NW204_GEN300_R2	2	2	2	6	54	56	101	337.28	45.2	13	81.4	483.4	432726
Lithuania	2023	LT23	NW205	NW205_GEN300_R1	1	1	5	11	55	62	101	320.2	41.6	15.3	81.8	500.6	456869
Lithuania	2023	LT23	NW205	NW205_GEN300_R2	2	2	13	6	55	63.33	101	360.41	42	15.6	81.1	500.6	456869
Lithuania	2023	LT23	NW206	NW206_GEN300_R1	1	1	6	11	52	54	101	298.51	44	14.9	82.7	450.35	387406
Lithuania	2023	LT23	NW206	NW206_GEN300_R2	2	2	3	12	53	57.33	101	310.52	43.2	14.8	82.3	466.7	409623
Lithuania	2023	LT23	NW207	NW207_GEN300_R1	1	1	7	11	55	66.67	101	281.86	43.2	15.1	82.5	500.6	456869
Lithuania	2023	LT23	NW207	NW207_GEN300_R2	2	2	13	4	57	70	101	317.41	43.2	15.3	81.5	529.85	502076
Lithuania	2023	LT23	NW208	NW208_GEN300_R1	1	1	8	11	56	64	101	326.12	39.6	16	81	514.45	478497
Lithuania	2023	LT23	NW208	NW208_GEN300_R2	2	2	4	13	58	62.67	102	275.12	38.4	16.5	81.2	544.1	525080
Lithuania	2023	LT23	NW209	NW209_GEN300_R1	1	1	9	11	53	69.33	101	412.16	44	13.9	82.4	466.7	409623
Lithuania	2023	LT23	NW209	NW209_GEN300_R2	2	2	2	13	53	60.33	102	316.04	42.8	14.6	81.4	466.7	409623
Lithuania	2023	LT23	NW210	NW210_GEN300_R1	1	1	10	11	56	65.67	101	419.11	35.2	13.7	80.6	514.45	478497
Lithuania	2023	LT23	NW210	NW210_GEN300_R2	2	2	13	9	55	69	102	437.76	34.8	13.7	80.3	500.6	456869
Lithuania	2023	LT23	NW211	NW211_GEN300_R1	1	1	11	11	56	55.67	102	269.92	34.8	14.5	81.3	514.45	478497
Lithuania	2023	LT23	NW211	NW211_GEN300_R2	2	2	11	9	55	65.67	102	474.06	34.4	13.5	82.9	500.6	456869
Lithuania	2023	LT23	NW212	NW212_GEN300_R1	1	1	12	11	56	60	104	285.81	38	13.8	81.3	514.45	478497
Lithuania	2023	LT23	NW212	NW212_GEN300_R2	2	2	16	13	55	63	103	390.24	38.2	13.1	82.4	500.6	456869
Lithuania	2023	LT23	NW213	NW213_GEN300_R1	1	1	13	11	54	59	101	259.34	38	15.4	80.6	483.4	432726
Lithuania	2023	LT23	NW213	NW213_GEN300_R2	2	2	12	12	54	63.67	101	377.87	38.8	15.2	81.3	483.4	432726
Lithuania	2023	LT23	NW214	NW214_GEN300_R1	1	1	14	11	56	61.33	102	272.99	42.4	15.4	80.9	514.45	478497
Lithuania	2023	LT23	NW214	NW214_GEN300_R2	2	2	18	1	56	70.33	102	420.49	42	14.2	80.3	514.45	478497
Lithuania	2023	LT23	NW215	NW215_GEN300_R1	1	1	15	11	55	70	101	361.21	40.8	13.7	81.1	500.6	456869
Lithuania	2023	LT23	NW215	NW215_GEN300_R2	2	2	13	5	55	70	101	408.12	40.4	13.6	80.5	500.6	456869
Lithuania	2023	LT23	NW216	NW216_GEN300_R1	1	1	16	11	59	66.67	102	471.84	51.6	12.6	78.1	556.25	546514
Lithuania	2023	LT23	NW216	NW216_GEN300_R2	2	2	7	8	59	62.67	102	348.03	51.6	12.9	78.6	556.25	546514
Lithuania	2023	LT23	NW217	NW217_GEN300_R1	1	1	17	11	56	63.67	102	349.33	52.8	12.9	78.9	514.45	478497
Lithuania	2023	LT23	NW217	NW217_GEN300_R2	2	2	1	9	55	63	102	339.26	53.2	13.1	78.3	500.6	456869
Lithuania	2023	LT23	NW218	NW218_GEN300_R1	1	1	18	11	57	64.33	101	324.76	49.2	13.2	78.8	529.85	502076
Lithuania	2023	LT23	NW218	NW218_GEN300_R2	2	2	1	8	57	67	102	272.97	48	12.9	77.6	529.85	502076
Lithuania	2023	LT23	NW219	NW219_GEN300_R1	1	1	19	11	55	69.67	101	388.57	51.2	13.4	79.9	500.6	456869
Lithuania	2023	LT23	NW219	NW219_GEN300_R2	2	2	19	10	55	66	101	421.72	52.4	13.8	80.8	500.6	456869
Lithuania	2023	LT23	NW220	NW220_GEN300_R1	1	1	20	11	55	71.67	101	287.71	48.8	13.1	80.4	500.6	456869
Lithuania	2023	LT23	NW220	NW220_GEN300_R2	2	2	3	13	56	69	102	305.02	49.2	13.7	80.8	514.45	478497
Lithuania	2023	LT23	NW221	NW221_GEN300_R1	1	1	1	12	57	75	102	443.03	48.4	13.1	82.2	529.85	502076
Lithuania	2023	LT23	NW221	NW221_GEN300_R2	2	2	9	8	57	65.33	102	339.63	48	13.3	81	529.85	502076
Lithuania	2023	LT23	NW222	NW222_GEN300_R1	1	1	2	12	53	63.33	101	366.55	50	13.2	83.1	466.7	409623
Lithuania	2023	LT23	NW222	NW222_GEN300_R2	2	2	4	1	53	64.33	101	504.85	49.6	13.7	82.9	466.7	409623
Lithuania	2023	LT23	NW223	NW223_GEN300_R1	1	1	3	12	57	78.33	101	483.59	44.8	14.7	82	529.85	502076
Lithuania	2023	LT23	NW223	NW223_GEN300_R2	2	2	7	10	55	67.67	101	329.41	44.4	14.7	82.1	500.6	456869
Lithuania	2023	LT23	NW224	NW224_GEN300_R1	1	1	4	12	60	69.33	104	504.85	43.6	13.3	80.4	568.5	568467
Lithuania	2023	LT23	NW224	NW224_GEN300_R2	2	2	1	5	61	60.33	103	281.37	43.2	13.7	76.9	582.05	592164
Lithuania	2023	LT23	NW225	NW225_GEN300_R1	1	1	5	12	58	60	102	390.16	47.6	13.1	76.4	544.1	525080
Lithuania	2023	LT23	NW225	NW225_GEN300_R2	2	2	2	15	57	63.67	102	401.71	47.2	13.2	76.5	529.85	502076
Lithuania	2023	LT23	NW226	NW226_GEN300_R1	1	1	6	12	55	60	101	369.48	44.4	13.7	82	500.6	456869
Lithuania	2023	LT23	NW226	NW226_GEN300_R2	2	2	18	5	56	64	101	398.92	43.6	13.9	81.9	514.45	478497
Lithuania	2023	LT23	NW227	NW227_GEN300_R1	1	1	7	12	53	60.67	101	356.43	48.8	12.2	79.7	466.7	409623
Lithuania	2023	LT23	NW227	NW227_GEN300_R2	2	2	17	8	53	59.33	101	346.56	48.8	12.8	79.3	466.7	409623
Lithuania	2023	LT23	NW228	NW228_GEN300_R1	1	1	8	12	58	65.67	102	399.16	51.6	12.9	76.2	544.1	525080
Lithuania	2023	LT23	NW228	NW228_GEN300_R2	2	2	5	6	58	72.33	102	499.89	50	13.3	75.5	544.1	525080
Lithuania	2023	LT23	NW229	NW229_GEN300_R1	1	1	9	12	55	60.67	101	338.33	47.6	13.8	81	500.6	456869
Lithuania	2023	LT23	NW229	NW229_GEN300_R2	2	2	20	5	57	58.67	101	340.52	48.4	13.6	81.1	529.85	502076
Lithuania	2023	LT23	NW230	NW230_GEN300_R1	1	1	10	12	53	64.67	101	311.9	42	16.3	82.1	466.7	409623
Lithuania	2023	LT23	NW230	NW230_GEN300_R2	2	2	3	2	53	76.33	101	434.27	41.6	16.3	82.6	466.7	409623
Lithuania	2023	LT23	NW231	NW231_GEN300_R1	1	1	11	12	54	77	101	355.66	44.8	13.7	80.3	483.4	432726
Lithuania	2023	LT23	NW231	NW231_GEN300_R2	2	2	2	14	54	74.33	101	320.16	44.4	13.7	80.8	483.4	432726
Lithuania	2023	LT23	NW232	NW232_GEN300_R1	1	1	12	12	55	68.67	101	341.27	51.2	13.6	77.1	500.6	456869
Lithuania	2023	LT23	NW232	NW232_GEN300_R2	2	2	8	11	55	70.67	101	387.3	49.6	13.8	77.6	500.6	456869
Lithuania	2023	LT23	NW233	NW233_GEN300_R1	1	1	13	12	53	62.67	101	334.82	51.6	15.4	78.9	466.7	409623
Lithuania	2023	LT23	NW233	NW233_GEN300_R2	2	2	4	4	54	59	101	395.23	50.8	16	79.6	483.4	432726
Lithuania	2023	LT23	NW234	NW234_GEN300_R1	1	1	14	12	57	70	103	327.82	44	12.5	80.4	529.85	502076
Lithuania	2023	LT23	NW234	NW234_GEN300_R2	2	2	11	2	58	73	103	418.63	44	12.7	79	544.1	525080
Lithuania	2023	LT23	NW235	NW235_GEN300_R1	1	1	15	12	52	71	101	340.37	47.2	14.5	81.1	450.35	387406
Lithuania	2023	LT23	NW235	NW235_GEN300_R2	2	2	16	12	52	69	101	352.33	46	15	81.4	450.35	387406
Lithuania	2023	LT23	NW236	NW236_GEN300_R1	1	1	16	12	53	66.67	101	521.8	52.4	12.5	78.1	466.7	409623
Lithuania	2023	LT23	NW236	NW236_GEN300_R2	2	2	18	2	55	74.67	101	446.19	51.6	13.7	83.6	500.6	456869
Lithuania	2023	LT23	NW237	NW237_GEN300_R1	1	1	17	12	56	56	101	426.49	48.8	13.3	79.9	514.45	478497
Lithuania	2023	LT23	NW237	NW237_GEN300_R2	2	2	7	7	55	60.67	101	397.16	49.6	12.8	78.2	500.6	456869
Lithuania	2023	LT23	NW238	NW238_GEN300_R1	1	1	18	12	56	70	101	372.23	50.4	13.5	81	514.45	478497
Lithuania	2023	LT23	NW238	NW238_GEN300_R2	2	2	16	1	56	75.67	101	424.92	49.2	13.2	80.8	514.45	478497
Lithuania	2023	LT23	NW239	NW239_GEN300_R1	1	1	19	12	55	67.67	101	380.62	41.2	15.8	81.1	500.6	456869
Lithuania	2023	LT23	NW239	NW239_GEN300_R2	2	2	13	3	56	68	101	378.51	41.6	15.1	79	514.45	478497
Lithuania	2023	LT23	NW240	NW240_GEN300_R1	1	1	20	12	58	68	104	361.71	40.4	13.2	78.8	544.1	525080
Lithuania	2023	LT23	NW240	NW240_GEN300_R2	2	2	18	10	59	69	103	436.2	40.8	13.4	80.4	556.25	546514
Lithuania	2023	LT23	NW241	NW241_GEN300_R1	1	1	1	13	59	63.33	103	347.26	42.4	13.9	78.7	556.25	546514
Lithuania	2023	LT23	NW241	NW241_GEN300_R2	2	2	1	3	58	71	102	355.69	41.6	13.6	75.9	544.1	525080
Lithuania	2023	LT23	NW242	NW242_GEN300_R1	1	1	2	13	54	63.67	101	361.78	41.6	13.7	79.3	483.4	432726
Lithuania	2023	LT23	NW242	NW242_GEN300_R2	2	2	14	9	54	66.67	101	409.91	41.2	13.1	79.8	483.4	432726
Lithuania	2023	LT23	NW243	NW243_GEN300_R1	1	1	3	13	57	81	102	539.83	42	13.1	79.7	529.85	502076
Lithuania	2023	LT23	NW243	NW243_GEN300_R2	2	2	15	5	59	74.33	102	425.96	42.4	12.4	79.4	556.25	546514
Lithuania	2023	LT23	NW244	NW244_GEN300_R1	1	1	4	13	56	70.67	101	457.57	37.2	13.8	80.2	514.45	478497
Lithuania	2023	LT23	NW244	NW244_GEN300_R2	2	2	7	12	55	69.67	101	372.23	38	13.8	81.6	500.6	456869
Lithuania	2023	LT23	NW245	NW245_GEN300_R1	1	1	5	13	56	62.67	101	392.91	40.8	12.5	77.5	514.45	478497
Lithuania	2023	LT23	NW245	NW245_GEN300_R2	2	2	6	10	57	63.67	101	358.05	41.2	12.9	76.7	529.85	502076
Lithuania	2023	LT23	NW246	NW246_GEN300_R1	1	1	6	13	57	76.33	101	398.92	39.2	12.7	80.8	529.85	502076
Lithuania	2023	LT23	NW246	NW246_GEN300_R2	2	2	18	11	60	74.33	102	391.18	38	13.2	81.4	568.5	568467
Lithuania	2023	LT23	NW247	NW247_GEN300_R1	1	1	7	13	55	72.67	101	471.32	42.4	13.2	77.2	500.6	456869
Lithuania	2023	LT23	NW247	NW247_GEN300_R2	2	2	13	11	55	72	102	390.24	42	14	77.5	500.6	456869
Lithuania	2023	LT23	NW248	NW248_GEN300_R1	1	1	8	13	54	66.67	101	456.96	37.6	13.6	76	483.4	432726
Lithuania	2023	LT23	NW248	NW248_GEN300_R2	2	2	1	10	55	58	101	206.57	38	13.5	76	500.6	456869
Lithuania	2023	LT23	NW249	NW249_GEN300_R1	1	1	9	13	62	74.33	103	446.68	36.4	13.2	78.6	597.75	618550
Lithuania	2023	LT23	NW249	NW249_GEN300_R2	2	2	15	4	62	79.33	103	438.73	35.6	12	78.3	597.75	618550
Lithuania	2023	LT23	NW250	NW250_GEN300_R1	1	1	10	13	58	69.33	101	545.58	44	12.9	77.3	544.1	525080
Lithuania	2023	LT23	NW250	NW250_GEN300_R2	2	2	6	14	58	57	101	237.31	44	14.1	74.2	544.1	525080
Lithuania	2023	LT23	NW251	NW251_GEN300_R1	1	1	11	13	57	67.33	102	573.27	48.8	13	78.7	529.85	502076
Lithuania	2023	LT23	NW251	NW251_GEN300_R2	2	2	8	3	59	62.67	102	354.1	48.4	12.9	78	556.25	546514
Lithuania	2023	LT23	NW252	NW252_GEN300_R1	1	1	12	13	55	73	101	437.92	45.2	13.2	80.2	500.6	456869
Lithuania	2023	LT23	NW252	NW252_GEN300_R2	2	2	3	4	55	69.33	101	456.46	44.8	13.6	79.5	500.6	456869
Lithuania	2023	LT23	NW253	NW253_GEN300_R1	1	1	13	13	58	71.33	101	478.44	38.8	13.2	79.2	544.1	525080
Lithuania	2023	LT23	NW253	NW253_GEN300_R2	2	2	11	6	58	71.67	102	489.42	38.8	13.1	79.5	544.1	525080
Lithuania	2023	LT23	NW254	NW254_GEN300_R1	1	1	14	13	55	69.67	101	412.65	45.6	12.5	78.4	500.6	456869
Lithuania	2023	LT23	NW254	NW254_GEN300_R2	2	2	18	9	56	66.67	102	439.44	46.8	12.9	78	514.45	478497
Lithuania	2023	LT23	NW255	NW255_GEN300_R1	1	1	15	13	53	66.33	101	425.56	44.8	14.3	79.8	466.7	409623
Lithuania	2023	LT23	NW255	NW255_GEN300_R2	2	2	13	12	55	63	101	423.24	44.4	14.4	79.7	500.6	456869
Lithuania	2023	LT23	NW256	NW256_GEN300_R1	1	1	16	13	52	65.67	101	437.14	46.4	13.8	84.2	450.35	387406
Lithuania	2023	LT23	NW256	NW256_GEN300_R2	2	2	18	6	54	62	101	384.53	48	13	77.8	483.4	432726
Lithuania	2023	LT23	NW257	NW257_GEN300_R1	1	1	17	13	61	74.67	108	407.6	40.8	12.9	78.1	582.05	592164
Lithuania	2023	LT23	NW257	NW257_GEN300_R2	2	2	3	1	61	73.67	108	516.08	39.6	13.5	77.7	582.05	592164
Lithuania	2023	LT23	NW258	NW258_GEN300_R1	1	1	18	13	63	84.67	108	362.4	41.6	14	81.3	613.35	645368
Lithuania	2023	LT23	NW258	NW258_GEN300_R2	2	2	15	10	62	84	108	356.08	42	13.3	80.9	597.75	618550
Lithuania	2023	LT23	NW259	NW259_GEN300_R1	1	1	19	13	56	61.67	103	342.78	50.4	13.3	81.1	514.45	478497
Lithuania	2023	LT23	NW259	NW259_GEN300_R2	2	2	7	6	57	65.33	103	437.99	51.2	13.5	81.2	529.85	502076
Lithuania	2023	LT23	NW260	NW260_GEN300_R1	1	1	20	13	55	61	102	360.18	47.6	12.9	81.6	500.6	456869
Lithuania	2023	LT23	NW260	NW260_GEN300_R2	2	2	10	8	55	60	102	426.44	48.4	13.1	81.5	500.6	456869
Lithuania	2023	LT23	NW261	NW261_GEN300_R1	1	1	1	14	56	64	103	425.96	38.8	13	82	514.45	478497
Lithuania	2023	LT23	NW261	NW261_GEN300_R2	2	2	19	14	55	59	103	484.75	38.4	13.7	81.9	500.6	456869
Lithuania	2023	LT23	NW262	NW262_GEN300_R1	1	1	2	14	61	71	108	448.55	37.6	13.2	82.2	582.05	592164
Lithuania	2023	LT23	NW262	NW262_GEN300_R2	2	2	5	15	61	67	109	331.6	36.8	14.8	79.2	582.05	592164
Lithuania	2023	LT23	NW263	NW263_GEN300_R1	1	1	3	14	56	70	101	484.12	40.4	13.5	81.3	514.45	478497
Lithuania	2023	LT23	NW263	NW263_GEN300_R2	2	2	10	1	55	74	101	498.79	40.8	13.2	80.4	500.6	456869
Lithuania	2023	LT23	NW264	NW264_GEN300_R1	1	1	4	14	54	71	101	519.27	56.4	13.7	80.2	483.4	432726
Lithuania	2023	LT23	NW264	NW264_GEN300_R2	2	2	12	9	54	70.67	101	551.62	56	13.9	80.6	483.4	432726
Lithuania	2023	LT23	NW265	NW265_GEN300_R1	1	1	5	14	53	74	102	412.68	46	13.9	81.7	466.7	409623
Lithuania	2023	LT23	NW265	NW265_GEN300_R2	2	2	15	3	54	66.67	102	353.32	45.6	14.2	80.5	483.4	432726
Lithuania	2023	LT23	NW266	NW266_GEN300_R1	1	1	6	14	52	66.33	101	413.1	49.2	14	82	450.35	387406
Lithuania	2023	LT23	NW266	NW266_GEN300_R2	2	2	17	13	52	64.67	101	366.37	50.8	13.6	81.6	450.35	387406
Lithuania	2023	LT23	NW267	NW267_GEN300_R1	1	1	7	14	55	71.67	101	481.46	47.2	13.1	81.9	500.6	456869
Lithuania	2023	LT23	NW267	NW267_GEN300_R2	2	2	4	9	57	60.33	101	296.66	46.8	13.1	80.5	529.85	502076
Lithuania	2023	LT23	NW268	NW268_GEN300_R1	1	1	8	14	55	69.33	101	420.91	47.2	13.4	81.5	500.6	456869
Lithuania	2023	LT23	NW268	NW268_GEN300_R2	2	2	19	11	55	70	101	443.61	46.8	13.7	80.8	500.6	456869
Lithuania	2023	LT23	NW269	NW269_GEN300_R1	1	1	9	14	56	73.33	101	491.04	44.8	13.1	81.9	514.45	478497
Lithuania	2023	LT23	NW269	NW269_GEN300_R2	2	2	5	8	59	60.33	101	234.37	44.4	13.8	79.7	556.25	546514
Lithuania	2023	LT23	NW270	NW270_GEN300_R1	1	1	10	14	55	69.67	101	525.62	41.2	14.5	80.4	500.6	456869
Lithuania	2023	LT23	NW270	NW270_GEN300_R2	2	2	11	14	56	62.33	102	321.41	41.2	14.6	79.2	514.45	478497
Lithuania	2023	LT23	NW271	NW271_GEN300_R1	1	1	11	14	56	90	102	520.65	43.2	12.6	81.1	514.45	478497
Lithuania	2023	LT23	NW271	NW271_GEN300_R2	2	2	19	4	57	80	103	414.51	42.8	13.9	80.6	529.85	502076
Lithuania	2023	LT23	NW272	NW272_GEN300_R1	1	1	12	14	56	84.33	102	456.96	42	12.5	80.2	514.45	478497
Lithuania	2023	LT23	NW272	NW272_GEN300_R2	2	2	16	11	56	76	102	381.99	41.6	13.3	80	514.45	478497
Lithuania	2023	LT23	NW273	NW273_GEN300_R1	1	1	13	14	53	69.67	101	423.73	47.6	13.6	83.1	466.7	409623
Lithuania	2023	LT23	NW273	NW273_GEN300_R2	2	2	15	13	52	67.67	101	371	47.6	13.4	83.1	450.35	387406
Lithuania	2023	LT23	NW274	NW274_GEN300_R1	1	1	14	14	57	70	102	441.79	49.2	13.9	80.2	529.85	502076
Lithuania	2023	LT23	NW274	NW274_GEN300_R2	2	2	10	7	57	71.67	102	309.51	47.6	14.3	78.9	529.85	502076
Lithuania	2023	LT23	NW275	NW275_GEN300_R1	1	1	15	14	53	70.33	101	453	46	13.4	82.3	466.7	409623
Lithuania	2023	LT23	NW275	NW275_GEN300_R2	2	2	14	5	55	67.67	101	323.98	45.2	13.1	81.5	500.6	456869
Lithuania	2023	LT23	NW276	NW276_GEN300_R1	1	1	16	14	52	80	101	441.31	54	13.5	81.9	450.35	387406
Lithuania	2023	LT23	NW276	NW276_GEN300_R2	2	2	6	9	54	72	101	268.93	53.6	14	80	483.4	432726
Lithuania	2023	LT23	NW277	NW277_GEN300_R1	1	1	17	14	53	64	101	431.88	43.6	14.3	79.8	466.7	409623
Lithuania	2023	LT23	NW277	NW277_GEN300_R2	2	2	20	13	53	63.67	101	302.53	42.4	14.8	79.4	466.7	409623
Lithuania	2023	LT23	NW278	NW278_GEN300_R1	1	1	18	14	54	64.67	101	453.81	42.4	13.2	79	483.4	432726
Lithuania	2023	LT23	NW278	NW278_GEN300_R2	2	2	9	3	54	62.67	101	314.32	41.6	13.7	78.3	483.4	432726
Lithuania	2023	LT23	NW279	NW279_GEN300_R1	1	1	19	14	53	70.33	101	405.67	35.6	12.8	82.1	466.7	409623
Lithuania	2023	LT23	NW279	NW279_GEN300_R2	2	2	7	13	55	70	101	254.49	36	14	81.4	500.6	456869
Lithuania	2023	LT23	NW280	NW280_GEN300_R1	1	1	20	14	54	67.33	101	344.74	35.2	12.9	81.5	483.4	432726
Lithuania	2023	LT23	NW280	NW280_GEN300_R2	2	2	4	15	55	69.33	102	367.53	34.8	13.6	81.7	500.6	456869
Lithuania	2023	LT23	NW281	NW281_GEN300_R1	1	1	1	15	55	66	101	393.26	36.8	12.6	82.2	500.6	456869
Lithuania	2023	LT23	NW281	NW281_GEN300_R2	2	2	20	11	55	67.33	101	372.64	36.4	13.1	82	500.6	456869
Lithuania	2023	LT23	NW282	NW282_GEN300_R1	1	1	2	15	54	69.33	101	472.71	36	13	81.8	483.4	432726
Lithuania	2023	LT23	NW282	NW282_GEN300_R2	2	2	14	10	54	68.67	101	462.2	35.6	12.9	81.4	483.4	432726
Lithuania	2023	LT23	NW283	NW283_GEN300_R1	1	1	3	15	52	71.33	101	358.84	37.2	13.8	78.2	450.35	387406
Lithuania	2023	LT23	NW283	NW283_GEN300_R2	2	2	14	8	53	66.67	101	418.63	36.8	13.1	78.3	466.7	409623
Lithuania	2023	LT23	NW284	NW284_GEN300_R1	1	1	4	15	53	67.67	101	381.88	46.8	13.4	83.9	466.7	409623
Lithuania	2023	LT23	NW284	NW284_GEN300_R2	2	2	20	8	54	65.67	101	343.41	46	13.5	83.1	483.4	432726
Lithuania	2023	LT23	NW285	NW285_GEN300_R1	1	1	5	15	54	58.33	101	241.53	41.6	13.3	81.5	483.4	432726
Lithuania	2023	LT23	NW285	NW285_GEN300_R2	2	2	16	14	54	65.67	101	327.1	41.6	14.6	81.6	483.4	432726
Lithuania	2023	LT23	NW286	NW286_GEN300_R1	1	1	6	15	54	62.33	101	318.79	46.8	13	79.2	483.4	432726
Lithuania	2023	LT23	NW286	NW286_GEN300_R2	2	2	2	10	54	59.33	101	306.77	46	13.3	78.7	483.4	432726
Lithuania	2023	LT23	NW287	NW287_GEN300_R1	1	1	7	15	56	63.33	103	282.31	46	13	78.9	514.45	478497
Lithuania	2023	LT23	NW287	NW287_GEN300_R2	2	2	3	14	57	61.67	102	345.04	45.2	12.7	78.7	529.85	502076
Lithuania	2023	LT23	NW288	NW288_GEN300_R1	1	1	8	15	57	59.67	102	282.17	42.4	13.1	79.8	529.85	502076
Lithuania	2023	LT23	NW288	NW288_GEN300_R2	2	2	13	2	58	64.67	102	431.4	42	13.6	75.8	544.1	525080
Lithuania	2023	LT23	NW289	NW289_GEN300_R1	1	1	9	15	54	59	103	365.57	39.2	12.7	82.7	483.4	432726
Lithuania	2023	LT23	NW289	NW289_GEN300_R2	2	2	16	4	55	58	102	394.36	39.2	12.8	82	500.6	456869
Lithuania	2023	LT23	NW290	NW290_GEN300_R1	1	1	10	15	54	70	101	247.61	35.2	12.9	80.8	483.4	432726
Lithuania	2023	LT23	NW290	NW290_GEN300_R2	2	2	8	13	55	62.33	102	201.95	34.8	14.3	80	500.6	456869
Lithuania	2023	LT23	NW291	NW291_GEN300_R1	1	1	11	15	56	65.67	102	350.95	39.2	13.5	79.1	514.45	478497
Lithuania	2023	LT23	NW291	NW291_GEN300_R2	2	2	20	10	58	62.67	102	331.97	38.4	14	77	544.1	525080
Lithuania	2023	LT23	NW292	NW292_GEN300_R1	1	1	12	15	56	82.33	102	360.03	42.4	12.8	80.6	514.45	478497
Lithuania	2023	LT23	NW292	NW292_GEN300_R2	2	2	16	5	58	77	102	359.21	41.6	12.9	79.9	544.1	525080
Lithuania	2023	LT23	NW293	NW293_GEN300_R1	1	1	13	15	55	83.33	102	383.63	41.2	13.3	80.4	500.6	456869
Lithuania	2023	LT23	NW293	NW293_GEN300_R2	2	2	9	5	56	82.33	102	399.67	41.6	12.9	80.2	514.45	478497
Lithuania	2023	LT23	NW294	NW294_GEN300_R1	1	1	14	15	54	68.67	101	318.74	35.2	13.3	81.1	483.4	432726
Lithuania	2023	LT23	NW294	NW294_GEN300_R2	2	2	5	7	55	67.33	101	307.41	36	13.3	81	500.6	456869
Lithuania	2023	LT23	NW295	NW295_GEN300_R1	1	1	15	15	53	73.67	101	414.97	36	13.1	81.4	466.7	409623
Lithuania	2023	LT23	NW295	NW295_GEN300_R2	2	2	8	10	53	70.33	101	384.74	34.8	13.1	81.3	466.7	409623
Lithuania	2023	LT23	NW296	NW296_GEN300_R1	1	1	16	15	54	71.67	101	432.89	37.6	13.2	81.2	483.4	432726
Lithuania	2023	LT23	NW296	NW296_GEN300_R2	2	2	8	8	55	57.67	101	269.92	36.8	13.4	81.4	500.6	456869
Lithuania	2023	LT23	NW297	NW297_GEN300_R1	1	1	17	15	55	69.67	101	463.73	35.2	12.9	81.5	500.6	456869
Lithuania	2023	LT23	NW297	NW297_GEN300_R2	2	2	15	12	55	68.33	101	426.91	35.6	13.1	82.1	500.6	456869
Lithuania	2023	LT23	NW298	NW298_GEN300_R1	1	1	18	15	55	69.33	101	399.04	38	13.3	81.4	500.6	456869
Lithuania	2023	LT23	NW298	NW298_GEN300_R2	2	2	9	14	54	62.67	101	295.16	37.2	13.1	81.4	483.4	432726
Lithuania	2023	LT23	NW299	NW299_GEN300_R1	1	1	19	15	56	77	101	350	41.2	13.4	79.7	514.45	478497
Lithuania	2023	LT23	NW299	NW299_GEN300_R2	2	2	17	6	58	72.67	101	397.6	39.6	12.7	79.5	544.1	525080
Lithuania	2023	LT23	NW300	NW300_GEN300_R1	1	1	20	15	55	81.33	101	387.71	40	13.5	80.6	500.6	456869
Lithuania	2023	LT23	NW300	NW300_GEN300_R2	2	2	14	2	57	86.33	101	334.28	39.2	13.2	80.8	529.85	502076
Latvia	2021	LV21	NW001	191	1	1	14	8	53	72.3	93	425.9	34.4	17.3	70.4	464.95	429096
Latvia	2021	LV21	NW001	647	2	2	8	38	53	74.3	93	420.8	30.8	16.9	64.9	464.95	429096
Latvia	2021	LV21	NW002	250	1	1	15	12	53	74.7	93	426.4	32.3	17.3	71	464.95	429096
Latvia	2021	LV21	NW002	493	2	2	12	28	53	83	93	478.5	30.2	16.9	69	464.95	429096
Latvia	2021	LV21	NW003	271	1	1	7	13	52	68	93	469.2	30.6	17.3	69.1	449.5	406774
Latvia	2021	LV21	NW003	509	2	2	5	29	52	62.7	93	332.6	36.6	19.5	72.4	449.5	406774
Latvia	2021	LV21	NW004	121	1	1	7	3	52	86.3	93	502.5	34.1	15.3	72.1	449.5	406774
Latvia	2021	LV21	NW004	440	2	2	5	24	52	85.7	92	534.4	34.1	15.9	72.1	449.5	406774
Latvia	2021	LV21	NW005	351	1	1	4	18	52	74.7	91	439.4	28.5	17.3	69.5	449.5	406774
Latvia	2021	LV21	NW005	690	2	2	6	41	52	71.3	91	353.8	32.1	19.7	71.2	449.5	406774
Latvia	2021	LV21	NW006	301	1	1	7	15	53	82.3	93	485.9	33.6	16	71.8	464.95	429096
Latvia	2021	LV21	NW006	574	2	2	10	33	53	81.3	93	426.6	32.7	17.1	68.6	464.95	429096
Latvia	2021	LV21	NW007	332	1	1	8	17	52	84.7	91	484.4	34.6	16.5	74.4	449.5	406774
Latvia	2021	LV21	NW007	609	2	2	15	35	52	82.3	91	417.3	33.7	17.6	73.7	449.5	406774
Latvia	2021	LV21	NW008	168	1	1	7	6	53	80	93	357.9	27	17.1	65.3	464.95	429096
Latvia	2021	LV21	NW008	691	2	2	7	41	53	74	93	374.6	28	18.9	64.4	464.95	429096
Latvia	2021	LV21	NW009	346	1	1	9	18	53	84	93	502.6	34.7	16.2	77.2	464.95	429096
Latvia	2021	LV21	NW009	568	2	2	4	33	53	77	93	429.2	33.6	16.6	76.4	464.95	429096
Latvia	2021	LV21	NW010	291	1	1	4	14	53	90.7	93	497.1	32.4	15.4	70.8	464.95	429096
Latvia	2021	LV21	NW010	526	2	2	9	30	53	92.3	93	512	32.6	16.1	68.7	464.95	429096
Latvia	2021	LV21	NW011	348	1	1	7	18	53	75	93	498.4	31.3	17.2	72.3	464.95	429096
Latvia	2021	LV21	NW011	544	2	2	10	31	53	75.7	93	395.1	30.8	17.7	71.5	464.95	429096
Latvia	2021	LV21	NW012	224	1	1	11	10	50	83	91	379	37.1	18	68.8	410.45	356707
Latvia	2021	LV21	NW012	434	2	2	11	24	50	81.7	91	438.5	35.9	18	67.6	410.45	356707
Latvia	2021	LV21	NW013	230	1	1	5	10	53	76	93	434.2	39.2	16.3	75.7	464.95	429096
Latvia	2021	LV21	NW013	550	2	2	15	32	53	81	93	426.9	38.8	15.6	75.3	464.95	429096
Latvia	2021	LV21	NW014	165	1	1	10	6	52	69	93	371.7	35.4	17.9	73.4	449.5	406774
Latvia	2021	LV21	NW014	592	2	2	3	34	52	74.7	93	409.1	38.3	18	74	449.5	406774
Latvia	2021	LV21	NW015	279	1	1	15	13	53	71.3	93	420.8	28.1	15	72.4	464.95	429096
Latvia	2021	LV21	NW015	617	2	2	8	36	53	69.7	93	361.2	25.3	16	70.2	464.95	429096
Latvia	2021	LV21	NW016	378	1	1	7	20	52	59	90	359	27.8	19.6	68.2	449.5	406774
Latvia	2021	LV21	NW016	498	2	2	7	28	52	66.3	90	322.1	30.7	20.7	69.4	449.5	406774
Latvia	2021	LV21	NW017	350	1	1	5	18	52	75.3	89	415.2	27.6	19	66	449.5	406774
Latvia	2021	LV21	NW017	492	2	2	13	28	52	75.8	90	385.4	37.3	18.9	65.4	449.5	406774
Latvia	2021	LV21	NW018	138	1	1	7	4	52	82	93	422.8	24.7	17	66.5	449.5	406774
Latvia	2021	LV21	NW018	512	2	2	8	29	52	74.7	93	427.4	26.3	17.2	69.2	449.5	406774
Latvia	2021	LV21	NW019	359	1	1	5	19	54	70	93	376.1	35	15	71	480.3	451876
Latvia	2021	LV21	NW019	548	2	2	14	31	54	68.3	93	311.8	35.8	15.4	72.2	480.3	451876
Latvia	2021	LV21	NW020	201	1	1	4	8	57	84	93	422.8	25.1	20.2	68.8	520.4	517569
Latvia	2021	LV21	NW020	469	2	2	6	26	57	76.3	93	291.5	36.1	19.8	74.6	520.4	517569
Latvia	2021	LV21	NW021	227	1	1	8	10	57	86	93	343.4	35	17.2	73.8	520.4	517569
Latvia	2021	LV21	NW021	570	2	2	6	33	57	79	93	292.6	36.1	18.4	73.3	520.4	517569
Latvia	2021	LV21	NW022	194	1	1	11	8	51	68.3	93	433.9	37	17	75.2	432.1	383275
Latvia	2021	LV21	NW022	681	2	2	4	40	51	77.3	93	463.7	34.4	16.7	72.6	432.1	383275
Latvia	2021	LV21	NW023	145	1	1	1	5	52	76	93	519.5	30.7	13.6	75.7	449.5	406774
Latvia	2021	LV21	NW023	579	2	2	15	33	52	79	93	383.5	24.8	16.8	67.8	449.5	406774
Latvia	2021	LV21	NW024	335	1	1	11	17	53	62	93	448.3	31.9	16.9	73.6	464.95	429096
Latvia	2021	LV21	NW024	443	2	2	2	24	53	71.7	93	458.1	30.9	17.6	71.5	464.95	429096
Latvia	2021	LV21	NW025	214	1	1	10	9	53	74.7	93	491.5	33.5	16.2	73.9	464.95	429096
Latvia	2021	LV21	NW025	467	2	2	8	26	53	78.3	93	514.7	32.9	16.1	72.6	464.95	429096
Latvia	2021	LV21	NW026	352	1	1	3	18	53	74.3	93	487.8	29.9	17.2	69	464.95	429096
Latvia	2021	LV21	NW026	655	2	2	1	39	53	70.7	93	457.1	32.3	16	71.1	464.95	429096
Latvia	2021	LV21	NW027	161	1	1	14	6	52	68	93	493.3	33.9	15.7	73.8	449.5	406774
Latvia	2021	LV21	NW027	697	2	2	13	41	52	66.7	93	430.3	32.8	16	73.5	449.5	406774
Latvia	2021	LV21	NW028	234	1	1	1	10	53	85.3	93	495.2	32.5	16.2	72.6	464.95	429096
Latvia	2021	LV21	NW028	669	2	2	15	39	53	77.7	93	400.3	32.8	16.9	72.5	464.95	429096
Latvia	2021	LV21	NW029	286	1	1	9	14	53	78	93	503.8	37.5	16.4	76.5	464.95	429096
Latvia	2021	LV21	NW029	420	2	2	6	23	53	77	93	501.1	34.7	16.9	73	464.95	429096
Latvia	2021	LV21	NW030	304	1	1	10	15	54	68	93	523.6	38.6	17.1	75.5	480.3	451876
Latvia	2021	LV21	NW030	661	2	2	7	39	54	73	93	522.9	34.4	16.5	73.6	480.3	451876
Latvia	2021	LV21	NW031	273	1	1	9	13	53	73.7	93	480.4	34.6	18.5	73.3	464.95	429096
Latvia	2021	LV21	NW031	545	2	2	11	31	53	79.7	93	463.6	32.2	17.8	71.3	464.95	429096
Latvia	2021	LV21	NW032	336	1	1	12	17	54	65.7	93	489.4	37.7	15.9	72.8	480.3	451876
Latvia	2021	LV21	NW032	554	2	2	11	32	54	73.3	93	458.6	34.7	16.3	72.1	480.3	451876
Latvia	2021	LV21	NW033	172	1	1	3	6	51	90.7	91	381.7	33.9	17.2	72.1	432.1	383275
Latvia	2021	LV21	NW033	496	2	2	9	28	51	89.7	91	448.7	32.7	17.8	71.4	432.1	383275
Latvia	2021	LV21	NW034	391	1	1	7	21	52	81.7	93	458.2	29.6	16.2	68.1	449.5	406774
Latvia	2021	LV21	NW034	491	2	2	14	28	52	80	93	451.7	27.1	15.8	65.8	449.5	406774
Latvia	2021	LV21	NW035	368	1	1	14	19	54	61	93	441.6	30.3	18.1	70.4	480.3	451876
Latvia	2021	LV21	NW035	515	2	2	11	29	54	81.3	93	426	31.9	18.2	70.1	480.3	451876
Latvia	2021	LV21	NW036	200	1	1	5	8	54	86.3	93	327	35.2	19	73.9	480.3	451876
Latvia	2021	LV21	NW036	676	2	2	9	40	54	78.3	93	444.3	25.7	20.2	70	480.3	451876
Latvia	2021	LV21	NW037	283	1	1	12	14	51	83	93	403.8	27.2	20.5	72.4	432.1	383275
Latvia	2021	LV21	NW037	626	2	2	2	37	51	84.7	93	370.6	24.6	20.1	68.7	432.1	383275
Latvia	2021	LV21	NW038	357	1	1	3	19	52	81.7	93	544.7	31.8	15.8	69	449.5	406774
Latvia	2021	LV21	NW038	536	2	2	2	31	52	75.3	93	472.5	34.8	16	71.7	449.5	406774
Latvia	2021	LV21	NW039	294	1	1	1	14	51	87.7	93	401.4	31.5	18.2	69.6	432.1	383275
Latvia	2021	LV21	NW039	688	2	2	4	41	51	85.7	93	399.9	31.1	19	66.7	432.1	383275
Latvia	2021	LV21	NW040	150	1	1	6	5	52	75.3	93	445	32	17.7	71.5	449.5	406774
Latvia	2021	LV21	NW040	423	2	2	9	23	52	83.3	93	384.9	30.5	19	67.4	449.5	406774
Latvia	2021	LV21	NW041	382	1	1	3	20	53	78.3	93	491.2	33.1	15.8	68.1	464.95	429096
Latvia	2021	LV21	NW041	500	2	2	5	28	53	76	93	426.9	34.2	17.3	68.5	464.95	429096
Latvia	2021	LV21	NW042	136	1	1	9	4	53	89	93	538.3	32.9	16.1	71.9	464.95	429096
Latvia	2021	LV21	NW042	589	2	2	6	34	53	84	93	526	36.7	15.7	74.1	464.95	429096
Latvia	2021	LV21	NW043	196	1	1	9	8	53	87.3	93	468.7	34.1	17.8	70.8	464.95	429096
Latvia	2021	LV21	NW043	541	2	2	7	31	53	81.3	93	384.5	32.8	17.4	70.1	464.95	429096
Latvia	2021	LV21	NW044	383	1	1	2	20	50	76.3	93	432.3	34.1	17.3	71	410.45	356707
Latvia	2021	LV21	NW044	654	2	2	1	38	50	83.1	93	396.4	33.9	17	71.8	410.45	356707
Latvia	2021	LV21	NW045	277	1	1	13	13	51	87	93	294.2	33.6	18.3	75.2	432.1	383275
Latvia	2021	LV21	NW045	504	2	2	1	28	51	93.3	93	325.8	34.4	18.3	75.8	432.1	383275
Latvia	2021	LV21	NW046	324	1	1	1	16	52	85	93	413.8	32.6	16.2	70.3	449.5	406774
Latvia	2021	LV21	NW046	639	2	2	15	37	52	80.7	93	456.3	30.8	16.7	68.3	449.5	406774
Latvia	2021	LV21	NW047	192	1	1	13	8	53	62.7	93	470.1	31.3	17.8	72.8	464.95	429096
Latvia	2021	LV21	NW047	695	2	2	11	41	53	66	93	450.4	29.6	17.8	70.3	464.95	429096
Latvia	2021	LV21	NW048	167	1	1	8	6	54	90	93	465.5	25.9	16.3	71	480.3	451876
Latvia	2021	LV21	NW048	448	2	2	4	25	54	87.7	93	523.2	28.5	16.3	72.7	480.3	451876
Latvia	2021	LV21	NW049	399	1	1	15	21	53	72	90	525	31.6	17.1	75.7	464.95	429096
Latvia	2021	LV21	NW049	595	2	2	1	35	53	71.3	90	402.2	31.5	14.8	76.9	464.95	429096
Latvia	2021	LV21	NW050	364	1	1	10	19	52	70.3	93	409.9	33	16.9	72	449.5	406774
Latvia	2021	LV21	NW050	439	2	2	6	24	52	83	93	482.2	30.4	15.9	69.6	449.5	406774
Latvia	2021	LV21	NW051	288	1	1	7	14	52	72.3	93	625	34	14.3	74.6	449.5	406774
Latvia	2021	LV21	NW051	683	2	2	2	40	52	68.7	93	505.9	35.5	16	74	449.5	414838
Latvia	2021	LV21	NW052	198	1	1	7	8	53	77.3	93	560.1	33.4	15.8	74.2	464.95	429096
Latvia	2021	LV21	NW052	551	2	2	14	32	53	76.7	93	555.1	35.5	15	74.3	464.95	429096
Latvia	2021	LV21	NW053	372	1	1	13	20	53	86.7	93	512	29	17.1	69	464.95	429096
Latvia	2021	LV21	NW053	422	2	2	8	23	53	79.7	93	534.3	30.1	17.7	69	464.95	429096
Latvia	2021	LV21	NW054	385	1	1	1	21	52	90	93	357	46	16.4	73.6	449.5	406774
Latvia	2021	LV21	NW054	680	2	2	5	40	52	85.7	93	326	42.4	16.6	72.5	449.5	406774
Latvia	2021	LV21	NW055	184	1	1	10	7	54	79.3	93	489.8	34.8	15.6	72.4	480.3	451876
Latvia	2021	LV21	NW055	409	2	2	6	22	54	84	93	439.8	35.9	16.2	72.7	480.3	451876
Latvia	2021	LV21	NW056	186	1	1	12	7	53	77.3	93	359.2	29.8	17.7	71.1	464.95	429096
Latvia	2021	LV21	NW056	403	2	2	12	22	53	88.7	93	414.8	30.3	16.6	70.9	464.95	429096
Latvia	2021	LV21	NW057	205	1	1	1	9	52	68.7	93	543.4	32.4	14.4	76.4	449.5	406774
Latvia	2021	LV21	NW057	482	2	2	8	27	52	63.7	93	625.6	31.9	13.9	76.4	449.5	406774
Latvia	2021	LV21	NW058	375	1	1	10	20	52	81.3	93	490.3	31.4	17.3	75.6	449.5	406774
Latvia	2021	LV21	NW058	437	2	2	8	24	52	81	93	496.4	30.6	15.9	72.6	449.5	406774
Latvia	2021	LV21	NW059	331	1	1	7	17	51	74.7	93	581.8	32.2	15.6	73.4	432.1	383275
Latvia	2021	LV21	NW059	678	2	2	7	40	51	72	93	493.3	30	16.9	72	432.1	383275
Latvia	2021	LV21	NW060	349	1	1	6	18	54	79.3	93	510.1	26.2	16.4	71.7	480.3	451876
Latvia	2021	LV21	NW060	429	2	2	15	23	54	86.7	93	497.1	25.7	16.5	69.4	480.3	451876
Latvia	2021	LV21	NW061	215	1	1	11	9	52	66.3	93	468.7	36.4	16.9	76.6	449.5	406774
Latvia	2021	LV21	NW061	441	2	2	4	24	52	80	93	558.2	31	16.1	73	449.5	406774
Latvia	2021	LV21	NW062	207	1	1	3	9	53	66.7	93	534.1	30.7	16.3	73.8	464.95	429096
Latvia	2021	LV21	NW062	530	2	2	5	30	53	69.7	93	341.2	36.1	17.6	75.6	464.95	429096
Latvia	2021	LV21	NW063	216	1	1	12	9	53	69	93	526.9	32.6	15.8	73	464.95	429096
Latvia	2021	LV21	NW063	666	2	2	12	39	53	74.3	93	456.2	31.4	16.5	72	464.95	429096
Latvia	2021	LV21	NW064	210	1	1	6	9	52	82.3	93	573.9	28.3	16.8	69.2	449.5	406774
Latvia	2021	LV21	NW064	516	2	2	12	29	52	82.3	93	552.2	36.8	15.8	77.4	449.5	406774
Latvia	2021	LV21	NW065	240	1	1	6	11	54	83.7	93	520.7	30.2	16.7	73	480.3	451876
Latvia	2021	LV21	NW065	629	2	2	5	37	54	90	93	498.6	30.7	15.6	73.5	480.3	451876
Latvia	2021	LV21	NW066	280	1	1	15	14	51	85.3	93	249.5	32.3	17.8	73	432.1	383275
Latvia	2021	LV21	NW066	597	2	2	3	35	51	79	93	318.4	31.8	18.5	72.1	432.1	383275
Latvia	2021	LV21	NW067	236	1	1	2	11	52	78.3	93	409.5	33.8	16.8	65.3	449.5	406774
Latvia	2021	LV21	NW067	486	2	2	12	27	52	81	93	413.4	33.8	15.7	63.4	449.5	406774
Latvia	2021	LV21	NW068	129	1	1	15	3	54	71	93	464.6	35.3	15.7	73.5	480.3	451876
Latvia	2021	LV21	NW068	425	2	2	11	23	54	79	93	563.5	33.8	16.1	70.5	480.3	451876
Latvia	2021	LV21	NW069	258	1	1	7	12	52	87	93	584.1	37	15.3	71.5	449.5	406774
Latvia	2021	LV21	NW069	458	2	2	14	25	52	80.3	93	535.7	38.7	15.5	71.4	449.5	406774
Latvia	2021	LV21	NW070	268	1	1	4	13	53	82.3	93	574.9	33.9	16.1	70.7	464.95	429096
Latvia	2021	LV21	NW070	511	2	2	7	29	53	68.7	93	511.8	36.8	16.3	73.7	464.95	429096
Latvia	2021	LV21	NW071	323	1	1	2	16	53	72.7	95	614.6	40	14.9	75.1	464.95	429096
Latvia	2021	LV21	NW071	430	2	2	15	24	53	74.3	95	599.8	40	15	74	464.95	429096
Latvia	2021	LV21	NW072	398	1	1	14	21	53	79.7	93	620.1	36.3	16.1	71.7	464.95	429096
Latvia	2021	LV21	NW072	413	2	2	2	22	53	81	93	541	36.6	15.1	72.5	464.95	429096
Latvia	2021	LV21	NW073	285	1	1	10	14	53	78	93	543.3	37.7	16	75.5	464.95	429096
Latvia	2021	LV21	NW073	435	2	2	10	24	53	84.3	93	605.4	34.2	15.4	73.2	464.95	429096
Latvia	2021	LV21	NW074	187	1	1	13	7	51	72.3	95	543.7	40.9	15.5	76.9	432.1	383275
Latvia	2021	LV21	NW074	591	2	2	4	34	51	76.3	95	612.5	36.1	14.3	73.9	432.1	383275
Latvia	2021	LV21	NW075	305	1	1	11	15	53	74.3	93	545.4	39.7	15.8	75.8	464.95	429096
Latvia	2021	LV21	NW075	603	2	2	9	35	53	77.7	93	547.2	37.1	15.1	73.4	464.95	429096
Latvia	2021	LV21	NW076	157	1	1	13	5	55	77	93	521.8	36.8	15	74.8	493.4	473044
Latvia	2021	LV21	NW076	557	2	2	8	32	55	75.7	93	538.3	35.2	14.1	73.2	493.4	473044
Latvia	2021	LV21	NW077	220	1	1	15	10	53	79.7	93	623.1	40.2	15.6	77.2	464.95	429096
Latvia	2021	LV21	NW077	643	2	2	12	38	53	78	93	547.6	40.4	16.5	77.9	464.95	429096
Latvia	2021	LV21	NW078	300	1	1	6	15	52	79.7	91	447.1	27.5	17.8	70.7	449.5	406774
Latvia	2021	LV21	NW078	444	2	2	1	24	52	89	91	476.6	28.3	18.4	70.7	449.5	406774
Latvia	2021	LV21	NW079	125	1	1	11	3	51	77.3	93	392.7	34.1	16.5	70	432.1	383275
Latvia	2021	LV21	NW079	601	2	2	7	35	51	80.3	93	437.2	34.2	17.3	69.3	432.1	383275
Latvia	2021	LV21	NW080	112	1	1	3	2	53	77.7	91	495	29	16.2	67.2	464.95	429096
Latvia	2021	LV21	NW080	660	2	2	6	39	53	83.3	91	382.7	29.5	17.5	68.6	464.95	429096
Latvia	2021	LV21	NW081	155	1	1	11	5	53	86.3	93	532.3	40.9	15	76.4	464.95	429096
Latvia	2021	LV21	NW081	479	2	2	5	27	53	87.7	94	583.3	39.1	14.1	75.8	464.95	429096
Latvia	2021	LV21	NW082	337	1	1	13	17	53	74.3	95	515.7	40	16.4	73.3	464.95	429096
Latvia	2021	LV21	NW082	611	2	2	14	36	53	71.7	93	409.6	41.7	18	73.8	464.95	429096
Latvia	2021	LV21	NW083	392	1	1	8	21	53	84.7	93	531	40.7	16.7	73.1	464.95	429096
Latvia	2021	LV21	NW083	543	2	2	9	31	53	77.7	93	502.7	39.5	16.2	74.3	464.95	429096
Latvia	2021	LV21	NW084	193	1	1	12	8	53	76.7	93	407.7	41.3	18.6	75.2	464.95	429096
Latvia	2021	LV21	NW084	502	2	2	3	28	53	83.3	93	489.7	39.7	17.5	75.4	464.95	429096
Latvia	2021	LV21	NW085	195	1	1	10	8	57	82.3	94	555.8	37.6	14.9	71.3	520.4	517569
Latvia	2021	LV21	NW085	416	2	2	2	23	57	74.7	93	599.3	38.2	15.2	70.8	520.4	517569
Latvia	2021	LV21	NW086	307	1	1	13	15	52	72.3	93	546.6	38.9	16.1	74.5	449.5	406774
Latvia	2021	LV21	NW086	401	2	2	14	22	52	87.3	93	539.1	36.2	16.1	71.8	449.5	406774
Latvia	2021	LV21	NW087	108	1	1	7	2	52	82	93	369.1	26.5	16.7	68.4	449.5	406774
Latvia	2021	LV21	NW087	628	2	2	4	37	52	83	93	434.1	29.7	15.9	70.6	449.5	406774
Latvia	2021	LV21	NW088	365	1	1	11	19	50	77.7	89	365.4	31.8	19.6	70.8	410.45	356707
Latvia	2021	LV21	NW088	555	2	2	10	32	50	83.7	89	482.2	33.2	18	71.6	410.45	356707
Latvia	2021	LV21	NW089	102	1	1	13	2	51	77.7	93	415.2	30.4	16.8	71.1	432.1	383275
Latvia	2021	LV21	NW089	513	2	2	9	29	51	83.7	93	493.4	29.2	17.3	69.2	432.1	383275
Latvia	2021	LV21	NW090	197	1	1	8	8	53	81	93	478.5	32.2	16.8	69.3	464.95	429096
Latvia	2021	LV21	NW090	686	2	2	2	41	53	77.3	93	435.7	35.3	18.3	71	464.95	437434
Latvia	2021	LV21	NW091	254	1	1	11	12	57	71.7	93	521.8	35.1	15.5	71.7	520.4	517569
Latvia	2021	LV21	NW091	501	2	2	4	28	57	78	93	559.7	35.4	15.4	71.7	520.4	517569
Latvia	2021	LV21	NW092	264	1	1	1	12	51	88	93	492.7	32.7	16.4	73.4	432.1	383275
Latvia	2021	LV21	NW092	620	2	2	5	36	51	86.7	93	453	31.9	17.6	72.7	432.1	383275
Latvia	2021	LV21	NW093	292	1	1	3	14	53	86.7	93	561.4	34.5	15.4	71.1	464.95	429096
Latvia	2021	LV21	NW093	407	2	2	8	22	53	86.3	93	506.3	35.4	16.2	70.8	464.95	429096
Latvia	2021	LV21	NW094	237	1	1	3	11	53	88.7	93	584.1	32	15.7	73.9	464.95	429096
Latvia	2021	LV21	NW094	640	2	2	15	38	53	87.7	93	515.5	33.1	16.8	74.9	464.95	429096
Latvia	2021	LV21	NW095	239	1	1	5	11	52	68.3	93	478.5	31.6	16.1	73.7	449.5	406774
Latvia	2021	LV21	NW095	514	2	2	10	29	52	71.3	93	499	31.4	15.4	73.4	449.5	406774
Latvia	2021	LV21	NW096	171	1	1	4	6	54	87	94	513.4	32.1	15	71.5	480.3	451876
Latvia	2021	LV21	NW096	556	2	2	9	32	54	87.3	94	507.8	32.3	15	72	480.3	451876
Latvia	2021	LV21	NW097	355	1	1	1	19	53	75.7	93	499	36.2	14.4	70	464.95	429096
Latvia	2021	LV21	NW097	424	2	2	10	23	53	83	93	554	35.3	15.9	69.2	464.95	429096
Latvia	2021	LV21	NW098	342	1	1	13	18	54	85	93	554.8	32	14.7	72.5	480.3	451876
Latvia	2021	LV21	NW098	506	2	2	2	29	54	74	93	533.8	32.9	14.2	74	480.3	451876
Latvia	2021	LV21	NW099	209	1	1	5	9	53	79.7	93	544.9	32.7	16.1	61	464.95	429096
Latvia	2021	LV21	NW099	461	2	2	14	26	53	80	93	513.4	34.7	15.9	63.5	464.95	429096
[truncated: 5,202 more rows]

## Sheet: Table S3. Trait means across th
Table S2. Trait means across the trials.
Trial	GY	GPC	TKW	PH	TW	GDD	MAT	PTU	DH
EE21	437.7	15.3	33.4	73.6	79.6	494	99.04	561.57	65.26
EE22	718.2	12.2	38.3	93	82.1	512.9	104.69	553.49	60.12
EE23	364.5	17.4	39.5	46.6	78.4	420.6	108.52	451.86	61.07
LT21	529.1	14.8	32.3	80.1	73.9	584.9	101.02	635.76	65.62
LT22	497.5	11.7	36.2	93.4	79.5	540.9	115.19	608.14	68.22
LT23	341.2	14.3	40.3	67.7	79.8	501.8	101.4	460.94	55.21
LV21	504.1	16.1	34.4	79.2	72.6	466.3	93.14	432.08	53.14
LV22	623.6	13.4	37.8	95.5	78.8	411	117.3	453.53	64.36
LV23	551.1	15.4	43.5	75	79.2	376.8	116	370.43	57.58
NO21	508	9.7	40.5	90.2	NA	442	105.35	519.69	66.91
NO22	634.7	11.5	43.6	86.3	NA	446.3	105.36	488.29	61.32
NO23	417.3	15.4	34.9	64.1	75	468.5	105.39	399.7	46.1
GY - Grain yield, GPC - Grain protein content, TKW - Thousand kernel weight, PH - Plant height, TW - Test weight, GDD - Growing Degree Days, MAT – days to maturity, PTU - Photo thermal units, DH - Days to heading.

## Sheet: Table S4. The genotypes in Nort
Table S3. The genotypes in Northern and Southern genotype clusters.
Genotype cluster	Country of origin (ISO 3166-1 alpha-2 two-letter)	Number of genotypes
Northern (n=136)	NO	38
	EE	34
	LV	24
	LT	13
	SE	12
	PL	5
	DE	3
	FI	3
	NL	2
	CA	1
	CN	1
Southern (n=163)	LT	48
	DE	34
	LV	27
	CH	10
	PL	7
	MX(CIMMYT)	6
	CZ	5
	EE	5
	AT	3
	BY	3
	FI	3
	NO	3
	SE	3
	AU	1
	CN	1
	DK	1
	FR	1
	GB	1
	ZA	1

## Sheet: Table S5. Genetic markers assoc
Table S4. Genetic markers associated with Northern and Southern spring wheat genotype clusters.
Marker	Chr	Position (Mbp)	H&B.P.Value	Minor Alelle	MAF1 in NOBALwheat panel	MAF in Northern cluster	MAF in Southern cluster	Marker location
BobWhite_c33344_143	3B	736.67	2.66e-07	T	0.43	0.83	0.1	TraesCS3B01G490600 (glutathione S-transferase 3-like)
AX-158543919	7A	40.14	0.000123152	T	0.43	0.779	0.147	Near TraesCS7A01G074300 (uncharacterized LOC123152196), TraesCS7A01G074400 (uncharacterized LOC119289691), TraesCS7A01G074500 (ABC transporter G family member 51-like)
AX-95175904	3D	441.25	0.000832318	G	0.42	0.088	0.706	Near TraesCS3D01G328600, TraesCS3D01G328700, TraesCS3D01G328500
AX-158559797	7A	17.46	0.000869496	C	0.46	0.82	0.154	Near TraesCS7A01G039200 and disease resistance gene cluster, ATP-dependent RNA helicase glh-1-like
RAC875_c46516_443	2A	51.59	0.0031511	C	0.42	0.233	0.571	TraesCS2A01G098300, and near TraesCS2A01G098200, TraesCS2A01G098100, TraesCS2A01G098000, TraesCS2A01G097900, TraesCS2A01G097800, TraesCS2A01G097700
wsnp_Ex_c10193_16730126	7B	648.93	0.0031511	C	0.35	0.125	0.54	TraesCS7B01G644500LC
IAAV3851	3A	729.23	0.00324512	T	0.02	0	0.0367	Near TraesCS3A01G690500LC
1 MAF – minor allele frequency
Physical positions of the markers are given for Wheat Chinese Spring IWGSC RefSeq v1.0 genome assembly.

## Sheet: Table S6. Genetic marker mappin
Table S5. Genetic marker mapping information.
Chromosome	Number of mapped markers
1A	1090
1B	1086
1D	375
2A	1078
2B	1259
2D	433
3A	1003
3B	1243
3D	247
4A	634
4B	556
4D	95
5A	1122
5B	1381
5D	290
6A	1050
6B	1081
6D	299
7A	1231
7B	810
7D	264
UN	1840
TOTAL	18467

## Sheet: Table S7. Significant markers
Table S6. The location of significant GWAS markers.
Trait	Associated Marker	InGene?	Distance from marker to gene model (centre)	Gene	Gene name	Species	GOTERM_BP_DIRECT	GOTERM_CC_DIRECT	GOTERM_MF_DIRECT	INTERPRO	KEGG_PATHWAY	PIR_SUPERFAMILY	SMART	UP_KW_BIOLOGICAL_PROCESS	UP_KW_CELLULAR_COMPONENT	UP_KW_DOMAIN	UP_KW_LIGAND	UP_KW_MOLECULAR_FUNCTION	UP_KW_PTM	UP_SEQ_FEATURE
GDD	TA016804-1075	no	18511	TraesCS7D02G099400	uncharacterized LOC123079863(LOC123079863)	Triticum aestivum	NA	NA	NA	NA	NA	NA	NA	NA	NA	NA	NA	NA	NA	COMPBIAS:Basic and acidic residues,REGION:Disordered,
GDD	TA016804-1075	no	65447	TraesCS7D02G099500	oligopeptide transporter 4-like(LOC123170797)	Triticum aestivum	GO:0015031~protein transport,	GO:0016021~integral component of membrane,	GO:0035673~oligopeptide transmembrane transporter activity,	IPR004648:Tetrapeptide transporter, OPT1/isp4,IPR004813:Oligopeptide transporter, OPT superfamily,	NA	NA	NA	KW-0571~Peptide transport,KW-0653~Protein transport,KW-0813~Transport,	KW-0472~Membrane,	KW-0812~Transmembrane,	NA	NA	NA	REGION:Disordered,TRANSMEM:Helical,
GDD	Excalibur_c5346_2716	no	1070	TraesCS2A02G209400	zinc finger A20 and AN1 domain-containing stress-associated protein 10-like(LOC123188317)	Triticum aestivum	NA	NA	GO:0003677~DNA binding,GO:0008270~zinc ion binding,	IPR000058:Zinc finger, AN1-type,IPR002653:Zinc finger, A20-type,	NA	NA	SM00154:ZnF_AN1,SM00259:ZnF_A20,	KW-0346~Stress response,	NA	NA	KW-0479~Metal-binding,KW-0862~Zinc,	NA	NA	DOMAIN:A20-type,DOMAIN:AN1-type,
GDD	Excalibur_c5346_2716	no	35793	TraesCS2A02G209300	NA	NA	NA	NA	NA	NA	NA	NA	NA	NA	NA	NA	NA	NA	NA	NA
GDD	Excalibur_c5346_2716	no	37156	TraesCS2A02G209200	Cyclin (A0A3B6AW79_WHEAT)	Triticum aestivum	GO:0000079~regulation of cyclin-dependent protein serine/threonine kinase activity,	NA	GO:0019901~protein kinase binding,	IPR013922:Cyclin PHO80-like,	NA	NA	NA	NA	NA	NA	NA	NA	NA	NA
GDD	Excalibur_c5346_2716	no	124145	TraesCS2A02G209500	uncharacterized LOC123188318(LOC123188318)	Triticum aestivum	NA	GO:0016021~integral component of membrane,	NA	IPR006461:Uncharacterised protein family Cys-rich,	NA	NA	NA	NA	KW-0472~Membrane,	KW-0812~Transmembrane,KW-1133~Transmembrane helix,	NA	NA	NA	REGION:Disordered,TRANSMEM:Helical,
GDD	Excalibur_c5346_2716	no	143797	TraesCS2A02G209600	GPI-anchored protein LLG1-like(LOC123185141)	Triticum aestivum	NA	NA	NA	NA	NA	NA	NA	NA	NA	KW-0732~Signal,	NA	NA	NA	NA
GDD	Excalibur_c5346_2716	no	150518	TraesCS2A02G209700	uncharacterized LOC123185142(LOC123185142)	Triticum aestivum	NA	GO:0016021~integral component of membrane,	NA	NA	NA	NA	NA	NA	KW-0472~Membrane,	KW-0812~Transmembrane,KW-1133~Transmembrane helix,	NA	NA	NA	REGION:Disordered,TRANSMEM:Helical,
GDD, DH, PTU	Excalibur_c2578_1966	yes	NA	TraesCS3A02G105800	protein ALWAYS EARLY 2-like(LOC123060364)	Triticum aestivum	GO:0000003~reproduction,GO:0006351~transcription, DNA-templated,GO:0006357~regulation of transcription from RNA polymerase II promoter,GO:0051726~regulation of cell cycle,	GO:0005634~nucleus,GO:0005654~nucleoplasm,GO:0017053~transcriptional repressor complex,	GO:0003677~DNA binding,	IPR001005:SANT/Myb domain,IPR009057:Homeodomain-like,IPR010561:DIRP,IPR017884:SANT domain,	NA	NA	SM01135:SM01135,	NA	KW-0539~Nucleus,	NA	NA	NA	NA	COMPBIAS:Basic and acidic residues,COMPBIAS:Polar residues,DOMAIN:DIRP,DOMAIN:SANT,REGION:Disordered,
GDD, DH, PTU	Excalibur_c2578_1966	no	8601	TraesCS3A02G105700	uncharacterized LOC123060363(LOC123060363)	Triticum aestivum	GO:0010268~brassinosteroid homeostasis,GO:0016125~sterol metabolic process,GO:0016132~brassinosteroid biosynthetic process,	NA	GO:0004497~monooxygenase activity,GO:0016491~oxidoreductase activity,	NA	NA	NA	NA	NA	NA	NA	NA	NA	NA	COMPBIAS:Polar residues,REGION:Disordered,
GDD, DH, PTU	Excalibur_c2578_1966	no	17853	TraesCS3A02G105900	uncharacterized RNA methyltransferase BH0687-like(LOC123060365)	Triticum aestivum	NA	NA	GO:0030696~tRNA (m5U54) methyltransferase activity,	IPR002792:TRAM domain,IPR010280:(Uracil-5)-methyltransferase,IPR012340:Nucleic acid-binding, OB-fold,	NA	NA	NA	NA	NA	NA	NA	NA	NA	ACT_SITE:Nucleophile,COMPBIAS:Pro residues,DOMAIN:TRAM,REGION:Disordered,
GDD, DH, PTU	Excalibur_c2578_1966	no	143268	TraesCS3A02G105600	protein IQ-DOMAIN 6-like(LOC123060362)	Triticum aestivum	NA	NA	NA	IPR000048:IQ motif, EF-hand binding site,	NA	NA	NA	NA	NA	NA	NA	NA	NA	COMPBIAS:Basic and acidic residues,COMPBIAS:Polar residues,REGION:Disordered,
GDD, DH, PTU	Excalibur_c2578_1966	no	154775	TraesCS3A02G105500	protein PHOSPHATE STARVATION RESPONSE 2-like(LOC123060361)	Triticum aestivum	NA	GO:0005634~nucleus,	GO:0003677~DNA binding,GO:0003700~transcription factor activity, sequence-specific DNA binding,	IPR006447:Myb domain, plants,IPR009057:Homeodomain-like,IPR017930:Myb domain,IPR025756:MYB-CC type transcription factor, LHEQLE-containing domain,	NA	NA	NA	KW-0804~Transcription,KW-0805~Transcription regulation,	NA	NA	NA	KW-0238~DNA-binding,	NA	COMPBIAS:Polar residues,DOMAIN:HTH myb-type,REGION:Disordered,
GDD, DH	BS00067975_51	no	37487	TraesCS2B02G140600	uncharacterized LOC123043802(LOC123043802)	Triticum aestivum	NA	GO:0016021~integral component of membrane,	NA	NA	NA	NA	NA	NA	KW-0472~Membrane,	KW-0812~Transmembrane,KW-1133~Transmembrane helix,	NA	NA	NA	TRANSMEM:Helical,
GDD, DH	BS00067975_51	no	57724	TraesCS2B02G140500	uncharacterized LOC123039066(LOC123039066)	Triticum aestivum	NA	GO:0016021~integral component of membrane,	NA	NA	NA	NA	NA	NA	KW-0472~Membrane,	KW-0812~Transmembrane,KW-1133~Transmembrane helix,	NA	NA	NA	TRANSMEM:Helical,
GDD, DH	BS00067975_51	no	120498	TraesCS2B02G140400	uncharacterized LOC123040722(LOC123040722)	Triticum aestivum	NA	GO:0016021~integral component of membrane,	NA	NA	NA	NA	NA	NA	KW-0472~Membrane,	KW-0812~Transmembrane,KW-1133~Transmembrane helix,	NA	NA	NA	TRANSMEM:Helical,
GDD, DH	BS00067975_51	no	126599	TraesCS2B02G140300	zinc finger protein CONSTANS-LIKE 13-like(LOC123040720)	Triticum aestivum	NA	GO:0005634~nucleus,	GO:0008270~zinc ion binding,	IPR000315:Zinc finger, B-box,IPR010402:CCT domain,	NA	NA	SM00336:BBOX,	NA	KW-0539~Nucleus,	KW-0863~Zinc-finger,	KW-0479~Metal-binding,KW-0862~Zinc,	NA	NA	DOMAIN:B box-type,DOMAIN:CCT,REGION:Disordered,
GDD, DH	BS00067975_51	no	143098	TraesCS2B02G140200	uncharacterized LOC123043800(LOC123043800)	Triticum aestivum	NA	NA	NA	NA	NA	NA	NA	NA	NA	KW-0732~Signal,	NA	NA	NA	NA
GDD	BobWhite_c26680_62	no	3759	TraesCSU02G000100	bisdemethoxycurcumin synthase-like(LOC123061498)	Triticum aestivum	GO:0009813~flavonoid biosynthetic process,GO:0030639~polyketide biosynthetic process,	NA	GO:0016747~transferase activity, transferring acyl groups other than amino-acyl groups,	IPR001099:Chalcone/stilbene synthase, N-terminal,IPR011141:Polyketide synthase, type III,IPR012328:Chalcone/stilbene synthase, C-terminal,IPR016039:Thiolase-like,	taes00945:Stilbenoid, diarylheptanoid and gingerol biosynthesis,taes01110:Biosynthesis of secondary metabolites,	PIRSF000451:type III polyketide synthase,	NA	NA	NA	NA	NA	KW-0012~Acyltransferase,KW-0808~Transferase,	NA	ACT_SITE:Acyl-thioester intermediate,DOMAIN:Chalcone/stilbene synthase C-terminal,DOMAIN:Chalcone/stilbene synthase N-terminal,
GDD	BobWhite_c26680_62	no	39327	TraesCSU02G000200	A0A3B6U2Y4_WHEAT	Triticum aestivum	NA	NA	NA	NA	NA	NA	NA	NA	NA	KW-0732~Signal,	NA	NA	NA	NA
GDD, DH	AX-95099408	yes	NA	TraesCS4B02G000500	ACT domain-containing protein ACR10-like(LOC123090474)	Triticum aestivum	NA	NA	NA	IPR002912:ACT domain,	NA	NA	NA	NA	NA	KW-0677~Repeat,	NA	NA	NA	DOMAIN:ACT,
GDD, DH	AX-95099408	no	21816	TraesCS4B02G000600	protein SOSEKI 3-like(LOC123087430)	Triticum aestivum	GO:0051258~protein polymerization,GO:0051302~regulation of cell division,GO:0090708~specification of plant organ axis polarity,GO:2000067~regulation of root morphogenesis,	GO:0005886~plasma membrane,GO:0031234~extrinsic component of cytoplasmic side of plasma membrane,	NA	IPR010369:Protein of unknown function DUF966,IPR021182:Uncharacterised conserved protein UCP031043,	NA	PIRSF031043:uncharacterized conserved protein,	NA	NA	NA	NA	NA	NA	NA	COMPBIAS:Basic and acidic residues,COMPBIAS:Polar residues,COMPBIAS:Pro residues,REGION:Disordered,
GDD, DH	AX-95099408	no	55948	TraesCS4B02G000700	A0A3B6IM86_WHEAT	Triticum aestivum	NA	NA	NA	NA	NA	NA	NA	NA	NA	KW-0732~Signal,	NA	NA	NA	REGION:Disordered,
GDD, DH	AX-95099408	no	70946	TraesCS4B02G000800	ataxin-2-like protein(LOC123094125)	Triticum aestivum	NA	NA	NA	NA	NA	NA	NA	NA	NA	NA	NA	NA	NA	COMPBIAS:Acidic residues,COMPBIAS:Basic and acidic residues,REGION:Disordered,
GDD, DH	AX-95099408	no	85480	TraesCS4B02G000900	uncharacterized LOC100682503(LOC100682503)	Triticum aestivum	NA	GO:0043231~intracellular membrane-bounded organelle,	NA	NA	NA	NA	NA	NA	NA	NA	NA	NA	NA	COMPBIAS:Basic and acidic residues,REGION:Disordered,
GDD, DH	AX-95099408	no	103185	TraesCS4B02G001000	glycine-rich cell wall structural protein 1.8-like(LOC123090471)	Triticum aestivum	GO:0006952~defense response,	NA	NA	IPR000008:C2 calcium-dependent membrane targeting,	NA	NA	SM00239:C2,	NA	NA	NA	NA	NA	NA	DOMAIN:C2,REGION:Disordered,
GDD, DH	AX-95099408	no	116687	TraesCS4B02G001100	AT-hook motif nuclear-localized protein 20-like(LOC123082528)	Triticum aestivum	NA	GO:0005634~nucleus,	GO:0003680~AT DNA binding,GO:0003700~transcription factor activity, sequence-specific DNA binding,	IPR005175:Domain of unknown function DUF296,IPR014476:Predicted AT-hook DNA-binding,	NA	PIRSF016021:AT-hook DNA-binding protein,	NA	KW-0804~Transcription,KW-0805~Transcription regulation,	KW-0539~Nucleus,	NA	NA	KW-0238~DNA-binding,	NA	COMPBIAS:Polar residues,DOMAIN:PPC,REGION:Disordered,
GDD	AX-94697168	yes	NA	TraesCS3B02G272900	uncharacterized LOC123070315(LOC123070315)	Triticum aestivum	GO:0045944~positive regulation of transcription from RNA polymerase II promoter,	GO:0005634~nucleus,	GO:0003682~chromatin binding,GO:0005524~ATP binding,GO:0016887~ATPase activity,GO:0042393~histone binding,GO:0046872~metal ion binding,	IPR003593:AAA+ ATPase domain,IPR003959:ATPase, AAA-type, core,IPR003960:ATPase, AAA-type, conserved site,IPR013083:Zinc finger, RING/FYVE/PHD-type,IPR027417:P-loop containing nucleoside triphosphate hydrolase,	NA	NA	SM00382:AAA,	NA	NA	KW-0103~Bromodomain,KW-0863~Zinc-finger,	KW-0479~Metal-binding,KW-0862~Zinc,	NA	NA	COMPBIAS:Acidic residues,COMPBIAS:Basic and acidic residues,DOMAIN:PHD-type,REGION:Disordered,
GDD	AX-94697168	no	10983	TraesCS3B02G273000	putative receptor protein kinase ZmPK1(LOC123070316)	Triticum aestivum	GO:0048544~recognition of pollen,	GO:0016021~integral component of membrane,	GO:0004674~protein serine/threonine kinase activity,GO:0004712~protein serine/threonine/tyrosine kinase activity,GO:0005524~ATP binding,	IPR000719:Protein kinase, catalytic domain,IPR000742:Epidermal growth factor-like domain,IPR000858:S-locus glycoprotein,IPR001480:Bulb-type lectin domain,IPR003609:Apple-like,IPR008271:Serine/threonine-protein kinase, active site,IPR011009:Protein kinase-like domain,IPR017441:Protein kinase, ATP binding site,IPR024171:S-receptor-like serine/threonine-protein kinase,	NA	PIRSF000641:receptor kinase, S-locus SRK type,	SM00108:B_lectin,SM00220:S_TKc,SM00473:PAN_AP,	NA	KW-0472~Membrane,	KW-0732~Signal,KW-0812~Transmembrane,KW-1133~Transmembrane helix,	KW-0067~ATP-binding,	KW-0418~Kinase,KW-0675~Receptor,KW-0808~Transferase,	KW-0325~Glycoprotein,KW-1015~Disulfide bond,	DOMAIN:Apple,DOMAIN:Bulb-type lectin,DOMAIN:EGF-like,DOMAIN:Protein kinase,TRANSMEM:Helical,
GDD	AX-94697168	no	120997	TraesCS3B02G272800	NA	NA	NA	NA	NA	NA	NA	NA	NA	NA	NA	NA	NA	NA	NA	NA
GDD	AX-94697168	no	122230	TraesCS3B02G272700	fasciclin-like arabinogalactan protein 11(LOC100037576)	Triticum aestivum	GO:0009834~plant-type secondary cell wall biogenesis,	GO:0005886~plasma membrane,	NA	IPR000782:FAS1 domain,	NA	NA	SM00554:FAS1,	NA	NA	KW-0732~Signal,	NA	NA	NA	DOMAIN:FAS1,REGION:Disordered,
GDD, DH, PTU	AX-94599217	yes	NA	TraesCS1A02G039400	protein HGH1 homolog(LOC123187452)	Triticum aestivum	NA	NA	NA	IPR007205:FAM203 N-terminal,IPR011989:Armadillo-like helical,IPR016024:Armadillo-type fold,	NA	NA	NA	NA	NA	NA	NA	NA	NA	DOMAIN:Protein HGH1 N-terminal,
GDD, DH, PTU	AX-94599217	no	90389	TraesCS1A02G039600	Knottin scorpion toxin-like domain-containing protein (A0A3B5XU89_WHEAT)	Triticum aestivum	NA	NA	NA	NA	NA	NA	NA	NA	NA	KW-0732~Signal,	NA	NA	NA	NA
GDD, DH, PTU	AX-94454402	yes	NA	TraesCS1B02G018700	putative 12-oxophytodienoate reductase 5(LOC123084089)	Triticum aestivum	GO:0006633~fatty acid biosynthetic process,GO:0031408~oxylipin biosynthetic process,	NA	GO:0010181~FMN binding,GO:0016491~oxidoreductase activity,	IPR001155:NADH:flavin oxidoreductase/NADH oxidase, N-terminal,IPR013785:Aldolase-type TIM barrel,	taes00592:alpha-Linolenic acid metabolism,taes01100:Metabolic pathways,taes01110:Biosynthesis of secondary metabolites,	NA	NA	KW-0275~Fatty acid biosynthesis,KW-0276~Fatty acid metabolism,KW-0443~Lipid metabolism,KW-0444~Lipid biosynthesis,KW-0925~Oxylipin biosynthesis,	NA	NA	KW-0285~Flavoprotein,KW-0288~FMN,KW-0521~NADP,	NA	NA	DOMAIN:NADH:flavin oxidoreductase/NADH oxidase N-terminal,
GDD, DH, PTU	AX-94454402	no	4338	TraesCS1B02G018800	putative 12-oxophytodienoate reductase 5(LOC123075622)	Triticum aestivum	GO:0006633~fatty acid biosynthetic process,GO:0031408~oxylipin biosynthetic process,	NA	GO:0010181~FMN binding,GO:0016491~oxidoreductase activity,	IPR001155:NADH:flavin oxidoreductase/NADH oxidase, N-terminal,IPR013785:Aldolase-type TIM barrel,	taes00592:alpha-Linolenic acid metabolism,taes01100:Metabolic pathways,taes01110:Biosynthesis of secondary metabolites,	NA	NA	KW-0275~Fatty acid biosynthesis,KW-0276~Fatty acid metabolism,KW-0443~Lipid metabolism,KW-0444~Lipid biosynthesis,KW-0925~Oxylipin biosynthesis,	NA	NA	KW-0285~Flavoprotein,KW-0288~FMN,KW-0521~NADP,	NA	NA	DOMAIN:NADH:flavin oxidoreductase/NADH oxidase N-terminal,REGION:Disordered,
GDD, DH, PTU	AX-94454402	no	34044	TraesCS1B02G018900	ras-related protein RABA2a-like(LOC123103302)	Triticum aestivum	NA	GO:0005768~endosome,	GO:0003924~GTPase activity,GO:0005525~GTP binding,	IPR001806:Small GTPase superfamily,IPR005225:Small GTP-binding protein domain,IPR027417:P-loop containing nucleoside triphosphate hydrolase,	taes04144:Endocytosis,	NA	NA	NA	NA	NA	NA	NA	NA	NA
GDD, DH, PTU	AX-94454402	no	49917	TraesCS1B02G018600	Protein kinase domain-containing protein(CFC21_004799)	Triticum aestivum	NA	GO:0016021~integral component of membrane,	GO:0004674~protein serine/threonine kinase activity,GO:0005524~ATP binding,	IPR000719:Protein kinase, catalytic domain,IPR003609:Apple-like,IPR008271:Serine/threonine-protein kinase, active site,IPR011009:Protein kinase-like domain,IPR017441:Protein kinase, ATP binding site,	NA	NA	SM00220:S_TKc,SM00473:PAN_AP,	NA	KW-0472~Membrane,	KW-0732~Signal,KW-0812~Transmembrane,KW-1133~Transmembrane helix,	NA	KW-0418~Kinase,KW-0723~Serine/threonine-protein kinase,KW-0808~Transferase,	KW-0325~Glycoprotein,KW-1015~Disulfide bond,	DOMAIN:Apple,DOMAIN:Protein kinase,TRANSMEM:Helical,
GDD, DH, PTU	AX-94454402	no	61143	TraesCS1B02G018500	G-type lectin S-receptor-like serine/threonine-protein kinase At2g19130(LOC123084068)	Triticum aestivum	NA	NA	GO:0004672~protein kinase activity,GO:0005524~ATP binding,	IPR000719:Protein kinase, catalytic domain,IPR008271:Serine/threonine-protein kinase, active site,IPR011009:Protein kinase-like domain,	NA	NA	SM00220:S_TKc,	NA	NA	NA	NA	NA	NA	DOMAIN:Protein kinase,
GDD, DH, PTU	AX-94454402	no	92716	TraesCS1B02G019000	disease resistance protein RPP13-like(LOC123084099)	Triticum aestivum	GO:0006952~defense response,	NA	GO:0005524~ATP binding,GO:0043531~ADP binding,	IPR002182:NB-ARC,IPR027417:P-loop containing nucleoside triphosphate hydrolase,	NA	NA	NA	NA	NA	NA	NA	NA	NA	DOMAIN:NB-ARC,DOMAIN:Rx N-terminal,
GDD, DH, PTU	AX-94454402	no	97114	TraesCS1B02G018300	Receptor-like serine/threonine-protein kinase(CFC21_004797)	Triticum aestivum	GO:0048544~recognition of pollen,	GO:0016021~integral component of membrane,	GO:0004674~protein serine/threonine kinase activity,GO:0004712~protein serine/threonine/tyrosine kinase activity,GO:0005524~ATP binding,	IPR000719:Protein kinase, catalytic domain,IPR000858:S-locus glycoprotein,IPR001480:Bulb-type lectin domain,IPR003609:Apple-like,IPR008271:Serine/threonine-protein kinase, active site,IPR011009:Protein kinase-like domain,IPR017441:Protein kinase, ATP binding site,IPR024171:S-receptor-like serine/threonine-protein kinase,	NA	PIRSF000641:receptor kinase, S-locus SRK type,	SM00108:B_lectin,SM00220:S_TKc,SM00473:PAN_AP,	NA	KW-0472~Membrane,	KW-0245~EGF-like domain,KW-0732~Signal,KW-0812~Transmembrane,KW-1133~Transmembrane helix,	KW-0067~ATP-binding,	KW-0418~Kinase,KW-0675~Receptor,KW-0808~Transferase,	KW-0325~Glycoprotein,KW-1015~Disulfide bond,	DOMAIN:Apple,DOMAIN:Bulb-type lectin,DOMAIN:Protein kinase,TRANSMEM:Helical,
GDD, DH, PTU	AX-94454402	no	141975	TraesCS1B02G018200	arginine decarboxylase-like(LOC123103280)	Triticum aestivum	GO:0006527~arginine catabolic process,GO:0008295~spermidine biosynthetic process,GO:0033388~putrescine biosynthetic process from arginine,	NA	GO:0008792~arginine decarboxylase activity,	IPR000183:Ornithine/DAP/Arg decarboxylase,IPR002985:Arginine decarboxylase,IPR009006:Alanine racemase/group IV decarboxylase, C-terminal,IPR022644:Orn/DAP/Arg decarboxylase 2, N-terminal,IPR022657:Orn/DAP/Arg decarboxylase 2, conserved site,	taes00330:Arginine and proline metabolism,taes01100:Metabolic pathways,taes01110:Biosynthesis of secondary metabolites,	PIRSF001336:arginine decarboxylase,	NA	NA	NA	NA	KW-0460~Magnesium,	KW-0456~Lyase,	NA	ACT_SITE:Proton donor,DOMAIN:Orn/DAP/Arg decarboxylase 2 N-terminal,
GDD, DH	AX-158589588	no	60085	TraesCS6B02G054600	F-box/LRR-repeat protein At3g26922-like(LOC123133350)	Triticum aestivum	NA	NA	NA	IPR001810:F-box domain, cyclin-like,IPR006566:FBD,	NA	NA	NA	NA	NA	NA	NA	NA	NA	DOMAIN:F-box,
GDD, DH	AX-158589588	no	96366	TraesCS6B02G054700	NA	NA	NA	NA	NA	NA	NA	NA	NA	NA	NA	NA	NA	NA	NA	NA
GDD, DH, PTU	AX-158523146	no	2658	TraesCS3A02G527200	ROTUNDIFOLIA like 8(CFC21_038593)	Triticum aestivum	GO:0008285~negative regulation of cell proliferation,	GO:0005886~plasma membrane,	NA	IPR012552:DVL,	NA	NA	NA	NA	KW-0472~Membrane,KW-1003~Cell membrane,	NA	NA	NA	NA	COMPBIAS:Basic and acidic residues,COMPBIAS:Polar residues,REGION:Disordered,
GDD, DH, PTU	AX-158523146	no	134033	TraesCS3A02G527300	probable WRKY transcription factor 49(LOC123059660)	Triticum aestivum	GO:0050896~response to stimulus,	GO:0005634~nucleus,	GO:0003700~transcription factor activity, sequence-specific DNA binding,GO:0043565~sequence-specific DNA binding,	IPR003657:DNA-binding WRKY,	NA	NA	SM00774:WRKY,	KW-0804~Transcription,KW-0805~Transcription regulation,	KW-0539~Nucleus,	NA	NA	KW-0238~DNA-binding,	NA	COMPBIAS:Basic and acidic residues,COMPBIAS:Polar residues,DOMAIN:WRKY,REGION:Disordered,
GDD, DH, PTU	AX-109946561	no	2829	TraesCS1B02G073900	HMA domain-containing protein(CFC21_005371)	Triticum aestivum	NA	NA	NA	NA	NA	NA	NA	NA	NA	NA	NA	NA	NA	DOMAIN:HMA,
GDD, DH, PTU	AX-109946561	no	12327	TraesCS1B02G073800	uncharacterized LOC123107114(LOC123107114)	Triticum aestivum	NA	NA	NA	NA	NA	NA	NA	NA	NA	NA	NA	NA	NA	COMPBIAS:Pro residues,REGION:Disordered,
GDD, DH, PTU	AX-109946561	no	16635	TraesCS1B02G074000	disease resistance protein Pik-1-like(LOC123085261)	Triticum aestivum	NA	NA	NA	NA	NA	NA	NA	NA	NA	NA	NA	NA	NA	DOMAIN:HMA,
GDD, DH, PTU	AX-109946561	no	55846	TraesCS1B02G074100	disease resistance protein Pik-1-like(LOC123107129)	Triticum aestivum	NA	NA	NA	NA	NA	NA	NA	NA	NA	NA	NA	NA	NA	DOMAIN:HMA,
GDD, DH, PTU	AX-109946561	no	78884	TraesCS1B02G074200	heavy metal-associated isoprenylated plant protein 47-like(LOC123077178)	Triticum aestivum	NA	NA	NA	NA	NA	NA	NA	NA	NA	NA	NA	NA	NA	DOMAIN:HMA,
GDD, DH, PTU	AX-109946561	no	85906	TraesCS1B02G074300	CFC21_005375	Triticum aestivum	NA	NA	NA	NA	NA	NA	NA	NA	NA	KW-0732~Signal,	NA	NA	NA	REGION:Disordered,
GDD, DH, PTU	AX-109946561	no	129043	TraesCS1B02G073700	probable uridine nucleosidase 2(LOC123107096)	Triticum aestivum	GO:0006139~nucleobase-containing compound metabolic process,GO:0006152~purine nucleoside catabolic process,GO:1901564~organonitrogen compound metabolic process,	GO:0005829~cytosol,	GO:0008477~purine nucleosidase activity,GO:0016799~hydrolase activity, hydrolyzing N-glycosyl compounds,	IPR001910:Inosine/uridine-preferring nucleoside hydrolase domain,IPR023186:Inosine/uridine-preferring nucleoside hydrolase,	taes00240:Pyrimidine metabolism,taes00760:Nicotinate and nicotinamide metabolism,taes01100:Metabolic pathways,taes01232:Nucleotide metabolism,	NA	NA	NA	NA	NA	NA	KW-0326~Glycosidase,KW-0378~Hydrolase,	NA	DOMAIN:Inosine/uridine-preferring nucleoside hydrolase,
GDD, DH, PTU	AX-109946561	no	139110	TraesCS1B02G074400	Adenylate isopentenyltransferase(CFC21_005376)	Triticum aestivum	GO:0006468~protein phosphorylation,GO:0042149~cellular response to glucose starvation,GO:0050790~regulation of catalytic activity,	GO:0005634~nucleus,GO:0005737~cytoplasm,GO:0031588~nucleotide-activated protein kinase complex,	GO:0016208~AMP binding,GO:0016740~transferase activity,GO:0019887~protein kinase regulator activity,GO:0019901~protein kinase binding,	IPR027417:P-loop containing nucleoside triphosphate hydrolase,	NA	NA	NA	KW-0203~Cytokinin biosynthesis,	NA	NA	NA	NA	NA	NA
GDD, DH, PTU	AX-109946561	no	147642	TraesCS1B02G074500	CFC21_005377	Triticum aestivum	GO:0044238~primary metabolic process,GO:0044260~cellular macromolecule metabolic process,	NA	GO:0046872~metal ion binding,	IPR001650:Helicase, C-terminal,IPR001841:Zinc finger, RING-type,IPR013083:Zinc finger, RING/FYVE/PHD-type,IPR017907:Zinc finger, RING-type, conserved site,IPR018957:Zinc finger, C3HC4 RING-type,IPR027417:P-loop containing nucleoside triphosphate hydrolase,	NA	NA	SM00184:RING,SM00490:HELICc,	NA	NA	NA	KW-0479~Metal-binding,KW-0862~Zinc,	NA	NA	DOMAIN:Helicase C-terminal,DOMAIN:RING-type,
PH	wsnp_JD_c30422_23944042	yes	NA	TraesCS3B02G125400	protein NDL1-like(LOC123068898)	Triticum aestivum	NA	GO:0016021~integral component of membrane,	NA	IPR004142:Ndr,	NA	NA	NA	NA	KW-0472~Membrane,	KW-0812~Transmembrane,KW-1133~Transmembrane helix,	NA	NA	NA	TRANSMEM:Helical,
PH	wsnp_Ex_c7965_13520238	yes	NA	TraesCS1A02G025900	probable serine/threonine-protein kinase WNK2(LOC123186170)	Triticum aestivum	GO:0006468~protein phosphorylation,GO:0035556~intracellular signal transduction,	GO:0005737~cytoplasm,	GO:0004674~protein serine/threonine kinase activity,GO:0004712~protein serine/threonine/tyrosine kinase activity,GO:0005524~ATP binding,	IPR000719:Protein kinase, catalytic domain,IPR008271:Serine/threonine-protein kinase, active site,IPR011009:Protein kinase-like domain,IPR024678:Serine/threonine-protein kinase OSR1/WNK, CCT domain,	NA	NA	SM00220:S_TKc,	NA	NA	NA	KW-0067~ATP-binding,KW-0547~Nucleotide-binding,	KW-0418~Kinase,KW-0808~Transferase,	NA	COMPBIAS:Basic and acidic residues,COMPBIAS:Polar residues,DOMAIN:Protein kinase,REGION:Disordered,
PH	wsnp_Ex_c7965_13520238	no	3171	TraesCS1A02G026000	DUF868 domain-containing protein (A0A3B5XTT8_WHEAT)	Triticum aestivum	NA	NA	NA	IPR008586:Protein of unknown function DUF868, plant,	NA	NA	NA	NA	NA	NA	NA	NA	NA	NA
PH	wsnp_Ex_c7965_13520238	no	14267	TraesCS1A02G025800	1-aminocyclopropane-1-carboxylate oxidase homolog 2-like(LOC123186187)	Triticum aestivum	NA	NA	GO:0016491~oxidoreductase activity,GO:0046872~metal ion binding,	IPR005123:Oxoglutarate/iron-dependent dioxygenase,IPR026992:Non-haem dioxygenase N-terminal domain,IPR027443:Isopenicillin N synthase-like,	NA	NA	NA	NA	NA	NA	KW-0408~Iron,	NA	NA	DOMAIN:Fe2OG dioxygenase,
PH	wsnp_Ex_c7965_13520238	no	35937	TraesCS1A02G026100	A0A3B5XTV9_WHEAT	Triticum aestivum	NA	NA	NA	NA	NA	NA	NA	NA	NA	NA	NA	NA	NA	REGION:Disordered,
PH	wsnp_Ex_c7965_13520238	no	56414	TraesCS1A02G025700	uncharacterized LOC123186153(LOC123186153)	Triticum aestivum	GO:0044238~primary metabolic process,GO:0044260~cellular macromolecule metabolic process,	GO:0043231~intracellular membrane-bounded organelle,	GO:0046872~metal ion binding,	IPR001357:BRCT domain,IPR001841:Zinc finger, RING-type,IPR011011:Zinc finger, FYVE/PHD-type,IPR013083:Zinc finger, RING/FYVE/PHD-type,IPR017907:Zinc finger, RING-type, conserved site,IPR019786:Zinc finger, PHD-type, conserved site,	NA	NA	SM00184:RING,SM00292:BRCT,	NA	NA	NA	KW-0479~Metal-binding,KW-0862~Zinc,	NA	NA	COMPBIAS:Basic and acidic residues,COMPBIAS:Polar residues,DOMAIN:BRCT,DOMAIN:RING-type,REGION:Disordered,
PH	wsnp_Ex_c7965_13520238	no	66029	BST_chr1A_nlr_79	NA	NA	NA	NA	NA	NA	NA	NA	NA	NA	NA	NA	NA	NA	NA	NA
PH	wsnp_Ex_c7965_13520238	no	137669	BST_pseudo_expressed_chr1A_nlr_12	NA	NA	NA	NA	NA	NA	NA	NA	NA	NA	NA	NA	NA	NA	NA	NA
PH	wsnp_Ex_c1050_2008559	yes	NA	TraesCSU02G000100	bisdemethoxycurcumin synthase-like(LOC123061498)	Triticum aestivum	GO:0009813~flavonoid biosynthetic process,GO:0030639~polyketide biosynthetic process,	NA	GO:0016747~transferase activity, transferring acyl groups other than amino-acyl groups,	IPR001099:Chalcone/stilbene synthase, N-terminal,IPR011141:Polyketide synthase, type III,IPR012328:Chalcone/stilbene synthase, C-terminal,IPR016039:Thiolase-like,	taes00945:Stilbenoid, diarylheptanoid and gingerol biosynthesis,taes01110:Biosynthesis of secondary metabolites,	PIRSF000451:type III polyketide synthase,	NA	NA	NA	NA	NA	KW-0012~Acyltransferase,KW-0808~Transferase,	NA	ACT_SITE:Acyl-thioester intermediate,DOMAIN:Chalcone/stilbene synthase C-terminal,DOMAIN:Chalcone/stilbene synthase N-terminal,
PH	wsnp_Ex_c1050_2008559	no	37357	TraesCSU02G000200	A0A3B6U2Y4_WHEAT	Triticum aestivum	NA	NA	NA	NA	NA	NA	NA	NA	NA	KW-0732~Signal,	NA	NA	NA	NA
PH	TG0011a	yes	NA	TraesCS4D02G040400	DELLA protein RHT-1(LOC123095833)	Triticum aestivum	GO:0006355~regulation of transcription, DNA-templated,GO:0009740~gibberellic acid mediated signaling pathway,	GO:0005634~nucleus,	GO:0003700~transcription factor activity, sequence-specific DNA binding,GO:0003712~transcription cofactor activity,GO:0043565~sequence-specific DNA binding,	IPR005202:Transcription factor GRAS,IPR021914:Transcriptional factor DELLA, N-terminal,	taes04075:Plant hormone signal transduction,	NA	NA	KW-0804~Transcription,KW-0805~Transcription regulation,KW-0939~Gibberellin signaling pathway,	KW-0539~Nucleus,	NA	NA	KW-0678~Repressor,	KW-0597~Phosphoprotein,KW-0832~Ubl conjugation,	COMPBIAS:Polar residues,DOMAIN:GRAS,DOMAIN:Transcriptional factor DELLA N-terminal,MOTIF:DELLA motif,MOTIF:LxCxE motif,MOTIF:VHIID,REGION:Disordered,REGION:Leucine repeat I (LRI),REGION:Leucine repeat II (LRII),REGION:PFYRE,REGION:SAW,REGION:VHIID,
PH	TG0011a	no	57368	TraesCS4D02G040300	uncharacterized LOC123095832(LOC123095832)	Triticum aestivum	NA	GO:0016021~integral component of membrane,	NA	IPR000620:Drug/metabolite transporter,	NA	NA	NA	NA	KW-0472~Membrane,	KW-0812~Transmembrane,KW-1133~Transmembrane helix,	NA	NA	NA	COMPBIAS:Polar residues,DOMAIN:EamA,REGION:Disordered,TRANSMEM:Helical,
PH	TG0011a	no	92322	TraesCS4D02G040200	uncharacterized LOC123095831(LOC123095831)	Triticum aestivum	GO:0044238~primary metabolic process,GO:0044260~cellular macromolecule metabolic process,	GO:0016021~integral component of membrane,	NA	IPR001841:Zinc finger, RING-type,IPR013083:Zinc finger, RING/FYVE/PHD-type,IPR019396:Transmembrane Fragile-X-F-associated protein,	NA	NA	SM00184:RING,	NA	KW-0472~Membrane,	KW-0812~Transmembrane,KW-0863~Zinc-finger,KW-1133~Transmembrane helix,	KW-0479~Metal-binding,KW-0862~Zinc,	NA	NA	DOMAIN:RING-type,TRANSMEM:Helical,
PH	TG0010a	yes	NA	TraesCS4B02G043100	DELLA protein RHT-1-like(LOC123090825)	Triticum aestivum	GO:0006355~regulation of transcription, DNA-templated,GO:0009740~gibberellic acid mediated signaling pathway,	GO:0005634~nucleus,	GO:0003700~transcription factor activity, sequence-specific DNA binding,GO:0003712~transcription cofactor activity,GO:0043565~sequence-specific DNA binding,	IPR005202:Transcription factor GRAS,IPR021914:Transcriptional factor DELLA, N-terminal,	taes04075:Plant hormone signal transduction,	NA	NA	KW-0804~Transcription,KW-0805~Transcription regulation,KW-0939~Gibberellin signaling pathway,	KW-0539~Nucleus,	NA	NA	NA	NA	COMPBIAS:Polar residues,DOMAIN:Transcriptional factor DELLA N-terminal,MOTIF:LxCxE motif,MOTIF:VHIID,REGION:Disordered,REGION:SAW,REGION:VHIID,
PH	TG0010a	no	24361	TraesCS4B02G043000	uncharacterized LOC123090823(LOC123090823)	Triticum aestivum	NA	GO:0016021~integral component of membrane,	NA	IPR000620:Drug/metabolite transporter,	NA	NA	NA	NA	KW-0472~Membrane,	KW-0812~Transmembrane,KW-1133~Transmembrane helix,	NA	NA	NA	COMPBIAS:Basic and acidic residues,COMPBIAS:Polar residues,DOMAIN:EamA,REGION:Disordered,TRANSMEM:Helical,
PH	TG0010a	no	136960	TraesCS4B02G042900	uncharacterized LOC123090821(LOC123090821)	Triticum aestivum	GO:0044238~primary metabolic process,GO:0044260~cellular macromolecule metabolic process,	GO:0016021~integral component of membrane,	NA	IPR001841:Zinc finger, RING-type,IPR013083:Zinc finger, RING/FYVE/PHD-type,IPR019396:Transmembrane Fragile-X-F-associated protein,	NA	NA	SM00184:RING,	NA	KW-0472~Membrane,	KW-0812~Transmembrane,KW-0863~Zinc-finger,KW-1133~Transmembrane helix,	KW-0479~Metal-binding,KW-0862~Zinc,	NA	NA	DOMAIN:RING-type,TRANSMEM:Helical,
PH	Excalibur_c21727_851	yes	NA	TraesCS4B02G257700	activating signal cointegrator 1 complex subunit 2-like(LOC123093065)	Triticum aestivum	GO:0000422~mitophagy,GO:0006497~protein lipidation,GO:0034497~protein localization to pre-autophagosomal structure,GO:0044804~nucleophagy,	GO:0005829~cytosol,GO:0019898~extrinsic component of membrane,GO:0034045~pre-autophagosomal structure membrane,	GO:0032266~phosphatidylinositol-3-phosphate binding,GO:0043130~ubiquitin binding,GO:0080025~phosphatidylinositol-3,5-bisphosphate binding,	IPR003892:Ubiquitin system component Cue,IPR009060:UBA-like,	NA	NA	SM00546:CUE,	NA	NA	NA	NA	NA	NA	COMPBIAS:Basic and acidic residues,COMPBIAS:Polar residues,COMPBIAS:Pro residues,DOMAIN:CUE,REGION:Disordered,
PH	Excalibur_c21727_851	no	6956	TraesCS4B02G257800	formin-like protein 8(LOC123093067)	Triticum aestivum	NA	GO:0016021~integral component of membrane,	NA	IPR015425:Actin-binding FH2,	NA	NA	SM00498:FH2,	NA	KW-0472~Membrane,	KW-0732~Signal,KW-0812~Transmembrane,KW-1133~Transmembrane helix,	NA	NA	NA	COMPBIAS:Basic and acidic residues,COMPBIAS:Polar residues,COMPBIAS:Pro residues,DOMAIN:FH2,REGION:Disordered,TRANSMEM:Helical,
GPC	Kukri_c57014_168	yes	NA	TraesCS2B02G538900	small RNA degrading nuclease 1-like(LOC123047099)	Triticum aestivum	NA	GO:0005634~nucleus,	GO:0003676~nucleic acid binding,GO:0004527~exonuclease activity,	IPR012337:Ribonuclease H-like domain,IPR013520:Exonuclease, RNase T/DNA polymerase III,	taes03008:Ribosome biogenesis in eukaryotes,	NA	SM00479:EXOIII,	NA	NA	NA	NA	NA	NA	COMPBIAS:Basic and acidic residues,DOMAIN:Exonuclease,REGION:Disordered,
GPC	Kukri_c57014_168	no	58322	TraesCS2B02G539000	uncharacterized LOC123047100(LOC123047100)	Triticum aestivum	NA	NA	NA	NA	NA	NA	NA	NA	NA	NA	NA	NA	NA	REGION:Disordered,
GPC	Kukri_c57014_168	no	73579	TraesCS2B02G539100	NA	NA	NA	NA	NA	NA	NA	NA	NA	NA	NA	NA	NA	NA	NA	NA
GPC	Kukri_c57014_168	no	76599	TraesCS2B02G538800	Isoaspartyl peptidase/L-asparaginase(CFC21_025969)	Triticum aestivum	GO:0016540~protein autoprocessing,	GO:0005737~cytoplasm,	GO:0004067~asparaginase activity,GO:0008798~beta-aspartyl-peptidase activity,	IPR000246:Peptidase T2, asparaginase 2,	NA	NA	NA	NA	NA	NA	NA	NA	NA	NA
GPC	Ku_c12842_664	yes	NA	TraesCS1D02G031300	uncharacterized LOC123179956(LOC123179956)	Triticum aestivum	NA	NA	GO:0004674~protein serine/threonine kinase activity,GO:0005524~ATP binding,	IPR000008:C2 calcium-dependent membrane targeting,IPR000719:Protein kinase, catalytic domain,IPR001245:Serine-threonine/tyrosine-protein kinase catalytic domain,IPR008271:Serine/threonine-protein kinase, active site,IPR011009:Protein kinase-like domain,IPR017441:Protein kinase, ATP binding site,	NA	NA	SM00220:S_TKc,SM00239:C2,	NA	NA	NA	NA	KW-0418~Kinase,KW-0723~Serine/threonine-protein kinase,KW-0808~Transferase,	NA	DOMAIN:C2,DOMAIN:Protein kinase,
GPC	Ku_c12842_664	no	11482	TraesCS1D02G031400	DEAD-box ATP-dependent RNA helicase 17-like(LOC123179957)	Triticum aestivum	GO:0042254~ribosome biogenesis,	GO:0005634~nucleus,	GO:0003723~RNA binding,GO:0003724~RNA helicase activity,GO:0005524~ATP binding,GO:0016787~hydrolase activity,	IPR001650:Helicase, C-terminal,IPR011545:DNA/RNA helicase, DEAD/DEAH box type, N-terminal,IPR014001:Helicase, superfamily 1/2, ATP-binding domain,IPR014014:RNA helicase, DEAD-box type, Q motif,IPR025313:Domain of unknown function DUF4217,IPR027417:P-loop containing nucleoside triphosphate hydrolase,	NA	NA	SM00487:DEXDc,SM00490:HELICc,SM01178:SM01178,	NA	NA	NA	KW-0067~ATP-binding,	KW-0347~Helicase,KW-0378~Hydrolase,KW-0694~RNA-binding,	NA	DOMAIN:DEAD-box RNA helicase Q,DOMAIN:Helicase ATP-binding,DOMAIN:Helicase C-terminal,MOTIF:Q motif,REGION:Disordered,
GPC	Ku_c12842_664	no	13972	TraesCS1D02G031500	respirasome Complex Assembly Factor 1-like(LOC123179959)	Triticum aestivum	GO:0006996~organelle organization,	GO:0016021~integral component of membrane,	NA	IPR010742:Rab5-interacting,	NA	NA	NA	NA	KW-0256~Endoplasmic reticulum,KW-0472~Membrane,	KW-0812~Transmembrane,	NA	NA	NA	REGION:Disordered,TRANSMEM:Helical,
GPC	Ku_c12842_664	no	18340	TraesCS1D02G031600	kinetochore protein SPC25 homolog(LOC123179958)	Triticum aestivum	GO:0007049~cell cycle,GO:0007059~chromosome segregation,GO:0051301~cell division,	GO:0005634~nucleus,GO:0031262~Ndc80 complex,	NA	IPR013255:Chromosome segregation protein Spc25,	NA	NA	NA	KW-0131~Cell cycle,KW-0498~Mitosis,	KW-0137~Centromere,KW-0158~Chromosome,KW-0539~Nucleus,KW-0995~Kinetochore,	KW-0175~Coiled coil,	NA	NA	NA	COMPBIAS:Basic and acidic residues,DOMAIN:Chromosome segregation protein Spc25 C-terminal,REGION:Disordered,
GPC	Ku_c12842_664	no	26889	TraesCS1D02G031700	PGR5-like protein 1A, chloroplastic(LOC123179960)	Triticum aestivum	GO:0009773~photosynthetic electron transport in photosystem I,	GO:0009535~chloroplast thylakoid membrane,GO:0016021~integral component of membrane,	GO:0016730~oxidoreductase activity, acting on iron-sulfur proteins as donors,	NA	NA	NA	NA	NA	KW-0472~Membrane,	KW-0812~Transmembrane,KW-1133~Transmembrane helix,	NA	NA	NA	REGION:Disordered,TRANSMEM:Helical,
GPC	Ku_c12842_664	no	33793	TraesCS1D02G031800	cytosolic sulfotransferase 5-like(LOC123162927)	Triticum aestivum	GO:0051923~sulfation,	GO:0005737~cytoplasm,	GO:0008146~sulfotransferase activity,	IPR000863:Sulfotransferase domain,IPR027417:P-loop containing nucleoside triphosphate hydrolase,	NA	NA	NA	NA	NA	NA	NA	KW-0808~Transferase,	NA	DOMAIN:Sulfotransferase,REGION:Disordered,
GPC	Ku_c12842_664	no	49090	TraesCS1D02G031200	scarecrow-like protein 34(LOC123179955)	Triticum aestivum	GO:0006355~regulation of transcription, DNA-templated,	GO:0005634~nucleus,	GO:0003700~transcription factor activity, sequence-specific DNA binding,GO:0043565~sequence-specific DNA binding,	IPR005202:Transcription factor GRAS,	NA	NA	NA	NA	NA	NA	NA	NA	NA	MOTIF:VHIID,REGION:Disordered,REGION:Leucine repeat I (LRI),REGION:Leucine repeat II (LRII),REGION:SAW,REGION:VHIID,
GPC	Ku_c12842_664	no	54844	TraesCS1D02G031100	probable jasmonic acid carboxyl methyltransferase 2(LOC123179953)	Triticum aestivum	GO:0032259~methylation,	NA	GO:0008757~S-adenosylmethionine-dependent methyltransferase activity,	IPR005299:SAM dependent carboxyl methyltransferase,	NA	NA	NA	NA	NA	NA	NA	NA	NA	NA
GPC	Ku_c12842_664	no	118084	TraesCS1D02G031900	laccase-15-like(LOC123179962)	Triticum aestivum	GO:0046274~lignin catabolic process,	GO:0048046~apoplast,	GO:0005507~copper ion binding,GO:0016491~oxidoreductase activity,GO:0052716~hydroquinone:oxygen oxidoreductase activity,	IPR001117:Multicopper oxidase, type 1,IPR002355:Multicopper oxidase, copper-binding site,IPR008972:Cupredoxin,IPR011706:Multicopper oxidase, type 2,IPR011707:Multicopper oxidase, type 3,	NA	NA	NA	KW-0439~Lignin degradation,	KW-0052~Apoplast,KW-0964~Secreted,	KW-0677~Repeat,KW-0732~Signal,	KW-0479~Metal-binding,	KW-0560~Oxidoreductase,	NA	DOMAIN:Plastocyanin-like,REGION:Disordered,
GPC	IAAV6653	no	3017	TraesCSU02G000100	bisdemethoxycurcumin synthase-like(LOC123061498)	Triticum aestivum	GO:0009813~flavonoid biosynthetic process,GO:0030639~polyketide biosynthetic process,	NA	GO:0016747~transferase activity, transferring acyl groups other than amino-acyl groups,	IPR001099:Chalcone/stilbene synthase, N-terminal,IPR011141:Polyketide synthase, type III,IPR012328:Chalcone/stilbene synthase, C-terminal,IPR016039:Thiolase-like,	taes00945:Stilbenoid, diarylheptanoid and gingerol biosynthesis,taes01110:Biosynthesis of secondary metabolites,	PIRSF000451:type III polyketide synthase,	NA	NA	NA	NA	NA	KW-0012~Acyltransferase,KW-0808~Transferase,	NA	ACT_SITE:Acyl-thioester intermediate,DOMAIN:Chalcone/stilbene synthase C-terminal,DOMAIN:Chalcone/stilbene synthase N-terminal,
GPC	IAAV6653	no	38585	TraesCSU02G000200	A0A3B6U2Y4_WHEAT	Triticum aestivum	NA	NA	NA	NA	NA	NA	NA	NA	NA	KW-0732~Signal,	NA	NA	NA	NA
GPC	Excalibur_c5700_244	no	6907	TraesCS7B02G352400	Leucine-rich repeat-containing N-terminal plant-type domain-containing protein (A0A3B6SRY4_WHEAT)	Triticum aestivum	NA	GO:0016021~integral component of membrane,	NA	IPR001611:Leucine-rich repeat,IPR003591:Leucine-rich repeat, typical subtype,	NA	NA	SM00369:LRR_TYP,	NA	KW-0472~Membrane,	KW-0433~Leucine-rich repeat,KW-0677~Repeat,KW-0812~Transmembrane,KW-1133~Transmembrane helix,	NA	NA	NA	TRANSMEM:Helical,
GPC	Excalibur_c5700_244	no	9006	TraesCS7B02G352500	uncharacterized vacuolar membrane protein YML018C-like(LOC123159461)	Triticum aestivum	NA	GO:0016021~integral component of membrane,	GO:0022857~transmembrane transporter activity,	IPR009262:Protein of unknown function DUF914, eukaryotic,	NA	NA	NA	KW-0813~Transport,	KW-0472~Membrane,	KW-0812~Transmembrane,	NA	NA	NA	REGION:Disordered,TRANSMEM:Helical,
GPC	Excalibur_c5700_244	no	32465	TraesCS7B02G352300	probable glycosyltransferase 4(LOC123160565)	Triticum aestivum	GO:0009969~xyloglucan biosynthetic process,	GO:0000139~Golgi membrane,GO:0016021~integral component of membrane,	GO:0016758~transferase activity, transferring hexosyl groups,	IPR008630:Galactosyl transferase,	NA	NA	NA	NA	KW-0472~Membrane,	KW-0735~Signal-anchor,KW-0812~Transmembrane,KW-1133~Transmembrane helix,	NA	KW-0808~Transferase,	NA	TRANSMEM:Helical,
GPC	AX-158542648	yes	NA	TraesCS5A02G330800	UDP-glycosyltransferase TURAN-like(LOC123104615)	Triticum aestivum	GO:0006486~protein glycosylation,	GO:0005783~endoplasmic reticulum,GO:0016021~integral component of membrane,	GO:0000030~mannosyltransferase activity,	IPR026051:Asparagine-linked glycosylation protein 1-like,	taes00510:N-Glycan biosynthesis,taes00513:Various types of N-glycan biosynthesis,taes01100:Metabolic pathways,	NA	NA	NA	KW-0472~Membrane,	KW-0812~Transmembrane,KW-1133~Transmembrane helix,	NA	KW-0328~Glycosyltransferase,KW-0808~Transferase,	NA	DOMAIN:Glycosyltransferase subfamily 4-like N-terminal,TRANSMEM:Helical,
GPC	AX-158542648	no	10399	TraesCS5A02G330900	beta-galactosidase 12-like(LOC123104616)	Triticum aestivum	GO:0005975~carbohydrate metabolic process,	GO:0005773~vacuole,	GO:0004565~beta-galactosidase activity,GO:0030246~carbohydrate binding,	IPR000922:D-galactoside/L-rhamnose binding SUEL lectin domain,IPR001944:Glycoside hydrolase, family 35,IPR008979:Galactose-binding domain-like,IPR017853:Glycoside hydrolase, superfamily,	NA	NA	NA	NA	KW-0052~Apoplast,	KW-0732~Signal,	NA	KW-0326~Glycosidase,KW-0378~Hydrolase,	NA	DOMAIN:Beta-galactosidase beta-sandwich,DOMAIN:Glycoside hydrolase 35 catalytic,DOMAIN:SUEL-type lectin,
GPC	AX-158542648	no	17092	TraesCS5A02G331000	protein MCM10 homolog(LOC123104617)	Triticum aestivum	GO:0006270~DNA replication initiation,	GO:0031298~replication fork protection complex,	GO:0003688~DNA replication origin binding,GO:0003697~single-stranded DNA binding,GO:0046872~metal ion binding,	IPR015408:Zinc finger, Mcm10/DnaG-type,	NA	NA	NA	NA	KW-0539~Nucleus,	NA	NA	NA	NA	DOMAIN:Zinc finger Mcm10/DnaG-type,REGION:Disordered,
GPC	AX-158542648	no	18712	TraesCS5A02G331100	NA	NA	NA	NA	NA	NA	NA	NA	NA	NA	NA	NA	NA	NA	NA	NA
GPC	AX-158542648	no	45299	TraesCS5A02G331200	NADP-dependent oxidoreductase domain-containing protein(CFC21_067070)	Triticum aestivum	NA	GO:0005737~cytoplasm,	GO:0004033~aldo-keto reductase (NADP) activity,GO:0047834~D-threo-aldose 1-dehydrogenase activity,	IPR023210:NADP-dependent oxidoreductase domain,	NA	NA	NA	NA	NA	NA	NA	NA	NA	DOMAIN:NADP-dependent oxidoreductase,
GPC	AX-158542648	no	91118	TraesCS5A02G331300	SKP1-like protein 1(LOC123104620)	Triticum aestivum	GO:0006511~ubiquitin-dependent protein catabolic process,GO:0016567~protein ubiquitination,	NA	GO:0097602~cullin family protein binding,	IPR001232:SKP1 component,IPR011333:BTB/POZ fold,IPR016072:SKP1 component, dimerisation,IPR016073:SKP1 component, POZ,IPR016897:E3 ubiquitin ligase, SCF complex, Skp subunit,	taes03083:Polycomb repressive complex,taes04120:Ubiquitin mediated proteolysis,taes04141:Protein processing in endoplasmic reticulum,	PIRSF028729:E3 ubiquitin ligase SCF complex, Skp subunit,	SM00512:Skp1,	NA	NA	NA	NA	NA	NA	DOMAIN:SKP1 component POZ,DOMAIN:SKP1 component dimerisation,
GPC	AX-158542648	no	92431	TraesCS5A02G331400	uncharacterized LOC123104619(LOC123104619)	Triticum aestivum	NA	GO:0016021~integral component of membrane,	NA	IPR008480:Protein of unknown function DUF761, plant,	NA	NA	NA	NA	KW-0472~Membrane,	KW-0812~Transmembrane,KW-1133~Transmembrane helix,	NA	NA	NA	TRANSMEM:Helical,
GPC	AX-158542648	no	96426	TraesCS5A02G331500	acyl carrier protein 2, chloroplastic(LOC123104621)	Triticum aestivum	NA	GO:0009507~chloroplast,	GO:0000036~ACP phosphopantetheine attachment site binding involved in fatty acid biosynthetic process,GO:0031177~phosphopantetheine binding,	IPR003231:Acyl carrier protein (ACP),IPR006162:Phosphopantetheine attachment site,IPR009081:Acyl carrier protein-like,IPR020806:Polyketide synthase, phosphopantetheine-binding domain,	NA	NA	SM00823:SM00823,	KW-0276~Fatty acid metabolism,KW-0443~Lipid metabolism,	KW-0150~Chloroplast,KW-0934~Plastid,	KW-0809~Transit peptide,	NA	NA	KW-0597~Phosphoprotein,	DOMAIN:Carrier,
GPC	AX-158542648	no	106048	TraesCS5A02G331600	Rx N-terminal domain-containing protein(CFC21_067075)	Triticum aestivum	GO:0006952~defense response,	NA	GO:0005524~ATP binding,	NA	NA	NA	NA	NA	NA	NA	NA	NA	NA	DOMAIN:Rx N-terminal,
GPC	AX-158542648	no	110726	TraesCS5A02G331700	CFC21_067076	Triticum aestivum	NA	GO:0016021~integral component of membrane,	NA	IPR004158:Protein of unknown function DUF247, plant,	NA	NA	NA	NA	KW-0472~Membrane,	KW-0812~Transmembrane,KW-1133~Transmembrane helix,	NA	NA	NA	TRANSMEM:Helical,
GPC	AX-158542648	no	119174	TraesCS5A02G331800	mediator of RNA polymerase II transcription subunit 4-like(LOC123104622)	Triticum aestivum	GO:0006357~regulation of transcription from RNA polymerase II promoter,	GO:0016592~mediator complex,GO:0070847~core mediator complex,	GO:0003712~transcription cofactor activity,	IPR019258:Mediator complex, subunit Med4,	NA	NA	NA	NA	KW-0539~Nucleus,	NA	NA	KW-0010~Activator,	NA	COMPBIAS:Polar residues,COMPBIAS:Pro residues,REGION:Disordered,
GPC	AX-158542648	no	125808	TraesCS5A02G331900	histone-binding protein MSI1-like(LOC123104623)	Triticum aestivum	GO:0010468~regulation of gene expression,	GO:0005634~nucleus,	GO:0042393~histone binding,	IPR001680:WD40 repeat,IPR015943:WD40/YVTN repeat-like-containing domain,IPR019775:WD40 repeat, conserved site,IPR020472:G-protein beta WD-40 repeat,IPR022052:Histone-binding protein RBBP4,	taes03082:ATP-dependent chromatin remodeling,taes03083:Polycomb repressive complex,	NA	SM00320:WD40,	NA	KW-0539~Nucleus,	KW-0677~Repeat,	NA	NA	NA	DOMAIN:Histone-binding protein RBBP4 N-terminal,REPEAT:WD,
GPC	AX-158542602	yes	NA	TraesCS5A02G531700	uncharacterized LOC123106051(LOC123106051)	Triticum aestivum	NA	NA	NA	IPR025486:Domain of unknown function DUF4378,	NA	NA	NA	NA	NA	NA	NA	NA	NA	COMPBIAS:Basic and acidic residues,COMPBIAS:Polar residues,DOMAIN:DUF4378,REGION:Disordered,
GPC	AX-158542602	no	20868	TraesCS5A02G531800	probable metal-nicotianamine transporter YSL9(LOC123106053)	Triticum aestivum	GO:0010039~response to iron ion,GO:0048316~seed development,	GO:0005886~plasma membrane,GO:0016020~membrane,GO:0016021~integral component of membrane,	GO:0035673~oligopeptide transmembrane transporter activity,GO:0051980~iron-nicotianamine transmembrane transporter activity,	IPR004813:Oligopeptide transporter, OPT superfamily,	NA	NA	NA	KW-0813~Transport,	KW-0472~Membrane,	KW-0812~Transmembrane,	NA	NA	NA	TRANSMEM:Helical,
GPC	AX-158542602	no	24314	TraesCS5A02G531600	protein PAIR1-like(LOC123101817)	Triticum aestivum	GO:0009553~embryo sac development,GO:0009556~microsporogenesis,GO:0042138~meiotic DNA double-strand break formation,GO:0048236~plant-type sporogenesis,GO:0070192~chromosome organization involved in meiotic cell cycle,	GO:0005634~nucleus,	NA	NA	NA	NA	NA	NA	NA	NA	NA	NA	NA	COMPBIAS:Polar residues,REGION:Disordered,
GPC	AX-158542602	no	24384	TraesCS5A02G531900	CFC21_069147	Triticum aestivum	NA	NA	NA	NA	NA	NA	NA	NA	NA	NA	NA	NA	NA	COMPBIAS:Acidic residues,COMPBIAS:Basic and acidic residues,REGION:Disordered,
GPC	AX-158542602	no	27535	TraesCS5A02G532000	probable apyrase 3(LOC123106054)	Triticum aestivum	NA	NA	GO:0005524~ATP binding,GO:0016787~hydrolase activity,	IPR000407:Nucleoside phosphatase GDA1/CD39,	taes00230:Purine metabolism,taes00240:Pyrimidine metabolism,taes01100:Metabolic pathways,taes01110:Biosynthesis of secondary metabolites,taes01232:Nucleotide metabolism,	NA	NA	NA	NA	KW-0732~Signal,	KW-0067~ATP-binding,KW-0547~Nucleotide-binding,	KW-0378~Hydrolase,	NA	ACT_SITE:Proton acceptor,
GPC	AX-158542602	no	37872	TraesCS5A02G532100	Acid phosphatase(CFC21_069149)	Triticum aestivum	NA	NA	NA	IPR005519:Acid phosphatase (Class B),IPR023214:HAD-like domain,	NA	NA	NA	NA	NA	KW-0732~Signal,	NA	NA	NA	NA
GPC	AX-158542602	no	44546	TraesCS5A02G532200	stem 28 kDa glycoprotein-like(LOC123106055)	Triticum aestivum	NA	NA	GO:0003993~acid phosphatase activity,	IPR005519:Acid phosphatase (Class B),IPR010028:Acid phosphatase, plant,IPR014403:Vegetative storage protein/acid phosphatase,IPR023214:HAD-like domain,	NA	PIRSF002674:vegetative storage protein/acid phosphatase,	NA	NA	NA	KW-0732~Signal,	NA	NA	KW-0325~Glycoprotein,	NA
GPC	AX-158542602	no	56223	TraesCS5A02G532300	stem 28 kDa glycoprotein-like(LOC123106056)	Triticum aestivum	NA	NA	GO:0003993~acid phosphatase activity,	IPR005519:Acid phosphatase (Class B),IPR010028:Acid phosphatase, plant,IPR014403:Vegetative storage protein/acid phosphatase,IPR023214:HAD-like domain,	NA	PIRSF002674:vegetative storage protein/acid phosphatase,	NA	NA	NA	KW-0732~Signal,	NA	NA	KW-0325~Glycoprotein,	NA
GPC	AX-158542602	no	66347	TraesCS5A02G532400	stem 28 kDa glycoprotein-like(LOC123106057)	Triticum aestivum	NA	NA	GO:0003993~acid phosphatase activity,	IPR005519:Acid phosphatase (Class B),IPR010028:Acid phosphatase, plant,IPR014403:Vegetative storage protein/acid phosphatase,IPR023214:HAD-like domain,	NA	PIRSF002674:vegetative storage protein/acid phosphatase,	NA	NA	NA	KW-0732~Signal,	NA	NA	KW-0325~Glycoprotein,	NA
PTU	RAC875_c1829_321	yes	NA	TraesCS7A02G103700	NA	NA	NA	NA	NA	NA	NA	NA	NA	NA	NA	NA	NA	NA	NA	NA
PTU	RAC875_c1829_321	no	5443	TraesCS7A02G103600	xyloglucan endotransglycosylase/hydrolase protein 8-like(LOC123148851)	Triticum aestivum	GO:0010411~xyloglucan metabolic process,GO:0042546~cell wall biogenesis,GO:0071555~cell wall organization,	GO:0048046~apoplast,	GO:0004553~hydrolase activity, hydrolyzing O-glycosyl compounds,GO:0016762~xyloglucan:xyloglucosyl transferase activity,	IPR000757:Glycoside hydrolase, family 16,IPR008264:Beta-glucanase,IPR010713:Xyloglucan endo-transglycosylase, C-terminal,IPR013320:Concanavalin A-like lectin/glucanase, subgroup,IPR016455:Xyloglucan endotransglucosylase/hydrolase,	NA	PIRSF005604:xyloglucan endotransglucosylase/hydrolase,	NA	KW-0961~Cell wall biogenesis/degradation,KW-9998~Cell wall biogenesis/degradation,	KW-0052~Apoplast,KW-0134~Cell wall,KW-0964~Secreted,	KW-0732~Signal,	NA	KW-0326~Glycosidase,KW-0378~Hydrolase,KW-0808~Transferase,	NA	ACT_SITE:Nucleophile,ACT_SITE:Proton donor,CARBOHYD:N-linked (GlcNAc...) asparagine,DOMAIN:GH16,
PTU	RAC875_c1829_321	no	10212	TraesCS7A02G103800	histone H3.2-like(LOC123148852)	Triticum aestivum	NA	GO:0000786~nucleosome,GO:0005634~nucleus,	GO:0003677~DNA binding,GO:0046982~protein heterodimerization activity,	IPR000164:Histone H3,IPR007125:Histone core,IPR009072:Histone-fold,	NA	NA	SM00428:H3,	NA	KW-0158~Chromosome,KW-0539~Nucleus,KW-0544~Nucleosome core,	NA	NA	KW-0238~DNA-binding,	NA	DOMAIN:Histone H2A/H2B/H3,REGION:Disordered,
PTU	RAC875_c1829_321	no	19835	TraesCS7A02G103500	xyloglucan endotransglycosylase/hydrolase protein 8-like(LOC123147783)	Triticum aestivum	GO:0010411~xyloglucan metabolic process,GO:0042546~cell wall biogenesis,GO:0071555~cell wall organization,	GO:0048046~apoplast,	GO:0004553~hydrolase activity, hydrolyzing O-glycosyl compounds,GO:0016762~xyloglucan:xyloglucosyl transferase activity,	IPR000757:Glycoside hydrolase, family 16,IPR008264:Beta-glucanase,IPR010713:Xyloglucan endo-transglycosylase, C-terminal,IPR013320:Concanavalin A-like lectin/glucanase, subgroup,IPR016455:Xyloglucan endotransglucosylase/hydrolase,	NA	PIRSF005604:xyloglucan endotransglucosylase/hydrolase,	NA	KW-0961~Cell wall biogenesis/degradation,KW-9998~Cell wall biogenesis/degradation,	KW-0052~Apoplast,KW-0134~Cell wall,KW-0964~Secreted,	KW-0732~Signal,	NA	KW-0326~Glycosidase,KW-0378~Hydrolase,KW-0808~Transferase,	NA	ACT_SITE:Nucleophile,ACT_SITE:Proton donor,CARBOHYD:N-linked (GlcNAc...) asparagine,DOMAIN:GH16,REGION:Disordered,
PTU	RAC875_c1829_321	no	22125	TraesCS7A02G103400	disease resistance protein RGA2-like(LOC123147781)	Triticum aestivum	GO:0006952~defense response,	NA	GO:0005524~ATP binding,GO:0043531~ADP binding,	IPR002182:NB-ARC,IPR027417:P-loop containing nucleoside triphosphate hydrolase,	NA	NA	NA	NA	NA	NA	NA	NA	NA	DOMAIN:NB-ARC,DOMAIN:Rx N-terminal,
PTU	RAC875_c1829_321	no	27158	TraesCS7A02G103300	NA	NA	NA	NA	NA	NA	NA	NA	NA	NA	NA	NA	NA	NA	NA	NA
PTU	RAC875_c1829_321	no	30409	TraesCS7A02G103200	NB-ARC domain-containing protein(CFC21_096001)	Triticum aestivum	NA	NA	GO:0005524~ATP binding,GO:0043531~ADP binding,	IPR002182:NB-ARC,IPR027417:P-loop containing nucleoside triphosphate hydrolase,	NA	NA	NA	NA	NA	NA	NA	NA	NA	DOMAIN:NB-ARC,DOMAIN:Rx N-terminal,
PTU	RAC875_c1829_321	no	39049	TraesCS7A02G103900	histone H3.2(LOC123060632)	Triticum aestivum	NA	GO:0000786~nucleosome,GO:0005634~nucleus,	GO:0003677~DNA binding,GO:0046982~protein heterodimerization activity,	IPR000164:Histone H3,IPR007125:Histone core,IPR009072:Histone-fold,	NA	NA	SM00428:H3,	NA	KW-0158~Chromosome,KW-0539~Nucleus,KW-0544~Nucleosome core,	NA	NA	KW-0238~DNA-binding,	KW-0007~Acetylation,KW-0488~Methylation,KW-0597~Phosphoprotein,	DOMAIN:Histone H2A/H2B/H3,REGION:Disordered,
PTU	RAC875_c1829_321	no	54640	TraesCS7A02G104000	uncharacterized LOC123151002(LOC123151002)	Triticum aestivum	NA	NA	NA	NA	NA	NA	NA	NA	NA	NA	NA	NA	NA	REGION:Disordered,
PTU	RAC875_c1829_321	no	57822	TraesCS7A02G104100	uncharacterized LOC123151001(LOC123151001)	Triticum aestivum	GO:0045739~positive regulation of DNA repair,	GO:0070531~BRCA1-A complex,GO:0070552~BRISC complex,	NA	IPR026126:BRISC and BRCA1-A complex member 1,	taes03440:Homologous recombination,	NA	NA	NA	NA	NA	NA	NA	NA	REGION:Disordered,
PTU	RAC875_c1829_321	no	80922	TraesCS7A02G103100	CFC21_096000	Triticum aestivum	NA	NA	GO:0016410~N-acyltransferase activity,	IPR003480:Transferase,IPR023213:Chloramphenicol acetyltransferase-like domain,	NA	NA	NA	NA	NA	NA	NA	NA	NA	REGION:Disordered,
PTU	RAC875_c1829_321	no	84198	TraesCS7A02G104200	basic blue protein-like(LOC123149229)	Triticum aestivum	NA	GO:0046658~anchored component of plasma membrane,	GO:0009055~electron carrier activity,	IPR003245:Plastocyanin-like,IPR008972:Cupredoxin,	NA	NA	NA	NA	NA	KW-0732~Signal,	NA	NA	NA	DOMAIN:Phytocyanin,
PTU	RAC875_c1829_321	no	114513	TraesCS7A02G104300	rosmarinate synthase-like(LOC123153027)	Triticum aestivum	NA	NA	GO:0016747~transferase activity, transferring acyl groups other than amino-acyl groups,	IPR003480:Transferase,IPR023213:Chloramphenicol acetyltransferase-like domain,	NA	NA	NA	NA	NA	NA	NA	NA	NA	NA
TW	TGWA25K-TG0157	yes	NA	TraesCSU02G000100	bisdemethoxycurcumin synthase-like(LOC123061498)	Triticum aestivum	GO:0009813~flavonoid biosynthetic process,GO:0030639~polyketide biosynthetic process,	NA	GO:0016747~transferase activity, transferring acyl groups other than amino-acyl groups,	IPR001099:Chalcone/stilbene synthase, N-terminal,IPR011141:Polyketide synthase, type III,IPR012328:Chalcone/stilbene synthase, C-terminal,IPR016039:Thiolase-like,	taes00945:Stilbenoid, diarylheptanoid and gingerol biosynthesis,taes01110:Biosynthesis of secondary metabolites,	PIRSF000451:type III polyketide synthase,	NA	NA	NA	NA	NA	KW-0012~Acyltransferase,KW-0808~Transferase,	ACT_SITE:Acyl-thioester intermediate,DOMAIN:Chalcone/stilbene synthase C-terminal,DOMAIN:Chalcone/stilbene synthase N-terminal,
TW	TGWA25K-TG0157	no	37612	TraesCSU02G000200	A0A3B6U2Y4_WHEAT	Triticum aestivum	NA	NA	NA	NA	NA	NA	NA	NA	NA	KW-0732~Signal,	NA	NA	NA
TW	IAAV6424	yes	NA	TraesCS2B02G494800	leucine-rich repeat extensin-like protein 5(LOC123046798)	Triticum aestivum	NA	NA	NA	NA	NA	NA	NA	NA	NA	KW-0732~Signal,	NA	NA	COMPBIAS:Pro residues,REGION:Disordered,
TW	IAAV6424	no	3728	TraesCS2B02G494700	IMPACT family member in pol 5'region-like(LOC123046797)	Triticum aestivum	GO:0006446~regulation of translational initiation,	NA	NA	IPR001498:Impact, N-terminal,IPR020568:Ribosomal protein S5 domain 2-type fold,IPR023582:Impact family,	NA	NA	NA	NA	NA	NA	NA	NA	DOMAIN:Impact N-terminal,
TW	IAAV6424	no	27339	TraesCS2B02G494600	BTB domain-containing protein(CFC21_025539)	Triticum aestivum	GO:0009628~response to abiotic stimulus,GO:0016567~protein ubiquitination,	NA	NA	IPR000210:BTB/POZ-like,IPR002083:MATH,IPR008974:TRAF-like,IPR011333:BTB/POZ fold,	NA	NA	SM00061:MATH,SM00225:BTB,	NA	NA	NA	NA	NA	DOMAIN:BTB,DOMAIN:MATH,
TW	IAAV6424	no	30133	TraesCS2B02G494900	transcription factor AIG1-like(LOC123042160)	Triticum aestivum	NA	NA	GO:0046983~protein dimerization activity,	IPR011598:Myc-type, basic helix-loop-helix (bHLH) domain,	NA	NA	SM00353:HLH,	KW-0804~Transcription,KW-0805~Transcription regulation,	NA	NA	NA	NA	DOMAIN:BHLH,REGION:Disordered,
TW	Excalibur_rep_c101263_892	yes	NA	TraesCS2B02G041600	ABC transporter B family member 25, mitochondrial-like(LOC123043187)	Triticum aestivum	GO:0006879~cellular iron ion homeostasis,GO:0055085~transmembrane transport,	GO:0005743~mitochondrial inner membrane,GO:0016021~integral component of membrane,	GO:0005524~ATP binding,GO:0042626~ATPase activity, coupled to transmembrane movement of substances,	IPR003439:ABC transporter-like,IPR003593:AAA+ ATPase domain,IPR011527:ABC transporter, transmembrane domain, type 1,IPR017871:ABC transporter, conserved site,IPR027417:P-loop containing nucleoside triphosphate hydrolase,	taes02010:ABC transporters,	NA	SM00382:AAA,	NA	KW-0472~Membrane,	KW-0812~Transmembrane,	KW-0067~ATP-binding,KW-0547~Nucleotide-binding,	NA	DOMAIN:ABC transmembrane type-1,DOMAIN:ABC transporter,REGION:Disordered,TRANSMEM:Helical,
TW	Excalibur_rep_c101263_892	no	10560	TraesCS2B02G041700	CFC21_020898	Triticum aestivum	NA	GO:0005829~cytosol,	GO:0008194~UDP-glycosyltransferase activity,GO:0016618~hydroxypyruvate reductase activity,GO:0030267~glyoxylate reductase (NADP) activity,GO:0051287~NAD binding,	IPR002213:UDP-glucuronosyl/UDP-glucosyltransferase,IPR006139:D-isomer specific 2-hydroxyacid dehydrogenase, catalytic domain,IPR006140:D-isomer specific 2-hydroxyacid dehydrogenase, NAD-binding,	NA	NA	NA	NA	NA	NA	NA	KW-0808~Transferase,	DOMAIN:D-isomer specific 2-hydroxyacid dehydrogenase NAD-binding,DOMAIN:D-isomer specific 2-hydroxyacid dehydrogenase catalytic,
TW	Excalibur_rep_c101263_892	no	14016	TraesCS2B02G041800	7-deoxyloganetin glucosyltransferase-like(LOC123043188)	Triticum aestivum	NA	NA	GO:0008194~UDP-glycosyltransferase activity,	IPR002213:UDP-glucuronosyl/UDP-glucosyltransferase,	NA	NA	NA	NA	NA	NA	NA	KW-0808~Transferase,	NA
TW	Excalibur_rep_c101263_892	no	16744	TraesCS2B02G041500	Protein PAIR1(CFC21_020896)	Triticum aestivum	GO:0048236~plant-type sporogenesis,GO:0070192~chromosome organization involved in meiotic cell cycle,GO:0071108~protein K48-linked deubiquitination,	GO:0005634~nucleus,	GO:0004843~thiol-dependent ubiquitin-specific protease activity,GO:0043130~ubiquitin binding,	NA	NA	NA	NA	NA	NA	NA	NA	NA	COMPBIAS:Polar residues,REGION:Disordered,
TW	Excalibur_rep_c101263_892	no	27766	TraesCS2B02G041400	CFC21_020895	Triticum aestivum	NA	NA	GO:0080043~quercetin 3-O-glucosyltransferase activity,GO:0080044~quercetin 7-O-glucosyltransferase activity,	IPR002213:UDP-glucuronosyl/UDP-glucosyltransferase,	NA	NA	NA	NA	NA	NA	NA	KW-0328~Glycosyltransferase,KW-0808~Transferase,	NA
TW	Excalibur_rep_c101263_892	no	103007	TraesCS2B02G041300	Chalcone synthase(CFC21_020894)	Triticum aestivum	GO:0009813~flavonoid biosynthetic process,GO:0030639~polyketide biosynthetic process,	NA	GO:0016747~transferase activity, transferring acyl groups other than amino-acyl groups,	IPR001099:Chalcone/stilbene synthase, N-terminal,IPR011141:Polyketide synthase, type III,IPR012328:Chalcone/stilbene synthase, C-terminal,IPR016039:Thiolase-like,	NA	PIRSF000451:type III polyketide synthase,	NA	NA	NA	NA	NA	KW-0012~Acyltransferase,KW-0808~Transferase,	ACT_SITE:Acyl-thioester intermediate,DOMAIN:Chalcone/stilbene synthase C-terminal,DOMAIN:Chalcone/stilbene synthase N-terminal,
TW	Excalibur_rep_c101263_892	no	122188	TraesCS2B02G041200	acetylserotonin O-methyltransferase 1-like(LOC123040060)	Triticum aestivum	GO:0019438~aromatic compound biosynthetic process,GO:0032259~methylation,	NA	GO:0008171~O-methyltransferase activity,GO:0008757~S-adenosylmethionine-dependent methyltransferase activity,GO:0046983~protein dimerization activity,	IPR001077:O-methyltransferase, family 2,IPR012967:Plant methyltransferase dimerisation,IPR016461:Caffeate O-methyltransferase (COMT) family,	NA	PIRSF005739:O-methyltransferase, eukaryotic COMT type,	NA	NA	NA	NA	KW-0949~S-adenosyl-L-methionine,	KW-0489~Methyltransferase,KW-0808~Transferase,	ACT_SITE:Proton acceptor,DOMAIN:O-methyltransferase,DOMAIN:Plant methyltransferase dimerisation,
TW	Excalibur_rep_c101263_892	no	129128	TraesCS2B02G041900	protein PAIR1-like(LOC123038809)	Triticum aestivum	GO:0009553~embryo sac development,GO:0009556~microsporogenesis,GO:0042138~meiotic DNA double-strand break formation,GO:0070192~chromosome organization involved in meiotic cell cycle,	GO:0005634~nucleus,	NA	NA	NA	NA	NA	NA	NA	NA	NA	NA	COMPBIAS:Polar residues,REGION:Disordered,
TW	Excalibur_rep_c101263_892	no	133654	TraesCS2B02G042000	7-deoxyloganetin glucosyltransferase-like(LOC123040063)	Triticum aestivum	NA	NA	GO:0008194~UDP-glycosyltransferase activity,GO:0016740~transferase activity,GO:0080043~quercetin 3-O-glucosyltransferase activity,GO:0080044~quercetin 7-O-glucosyltransferase activity,	IPR002213:UDP-glucuronosyl/UDP-glucosyltransferase,	NA	NA	NA	NA	NA	NA	NA	KW-0328~Glycosyltransferase,KW-0808~Transferase,	COMPBIAS:Basic residues,REGION:Disordered,
TW	Excalibur_rep_c101263_892	no	135735	TraesCS2B02G042100	UDP-glycosyltransferases domain-containing protein(CFC21_020902)	Triticum aestivum	NA	NA	GO:0080043~quercetin 3-O-glucosyltransferase activity,GO:0080044~quercetin 7-O-glucosyltransferase activity,	IPR002213:UDP-glucuronosyl/UDP-glucosyltransferase,	NA	NA	NA	NA	NA	NA	NA	KW-0808~Transferase,	NA
TKW	wsnp_Ex_c28707_37811644	yes	NA	TraesCS7A02G197400	uncharacterized LOC123149492(LOC123149492)	Triticum aestivum	GO:0006355~regulation of transcription, DNA-templated,	GO:0005634~nucleus,GO:0005737~cytoplasm,	NA	IPR018501:DDT domain superfamily,IPR018866:Zinc-finger domain of monoamine-oxidase A repressor R1,	NA	NA	SM00571:DDT,	KW-0804~Transcription,KW-0805~Transcription regulation,	KW-0539~Nucleus,KW-0963~Cytoplasm,	NA	NA	NA	KW-0597~Phosphoprotein,	COMPBIAS:Polar residues,DOMAIN:DDT,REGION:Disordered,
TKW	Tdurum_contig46389_1459	no	25076	TraesCS3B02G055600	Protein kinase domain-containing protein(CFC21_039416)	Triticum aestivum	NA	NA	GO:0004672~protein kinase activity,GO:0005524~ATP binding,GO:0030247~polysaccharide binding,	IPR000719:Protein kinase, catalytic domain,IPR008271:Serine/threonine-protein kinase, active site,IPR011009:Protein kinase-like domain,IPR017441:Protein kinase, ATP binding site,IPR025287:Wall-associated receptor kinase galacturonan-binding domain,	NA	NA	SM00220:S_TKc,	NA	NA	KW-0732~Signal,	NA	KW-0418~Kinase,KW-0808~Transferase,	NA	DOMAIN:Protein kinase,
TKW	Tdurum_contig46389_1459	no	62749	TraesCS3B02G055700	LEAF RUST 10 DISEASE-RESISTANCE LOCUS RECEPTOR-LIKE PROTEIN KINASE-like 2.4(LOC123068429)	Triticum aestivum	NA	GO:0016021~integral component of membrane,	GO:0004672~protein kinase activity,GO:0005524~ATP binding,GO:0030247~polysaccharide binding,	IPR000719:Protein kinase, catalytic domain,IPR000742:Epidermal growth factor-like domain,IPR008271:Serine/threonine-protein kinase, active site,IPR011009:Protein kinase-like domain,IPR017441:Protein kinase, ATP binding site,IPR025287:Wall-associated receptor kinase galacturonan-binding domain,	NA	NA	SM00220:S_TKc,	NA	KW-0472~Membrane,	KW-0732~Signal,KW-0812~Transmembrane,KW-1133~Transmembrane helix,	NA	KW-0418~Kinase,KW-0808~Transferase,	NA	DOMAIN:Protein kinase,TRANSMEM:Helical,
TKW	Tdurum_contig46389_1459	no	142456	TraesCS3B02G055800	Wall-associated receptor kinase galacturonan-binding domain-containing protein(CFC21_039418)	Triticum aestivum	NA	NA	GO:0030247~polysaccharide binding,	IPR025287:Wall-associated receptor kinase galacturonan-binding domain,	NA	NA	NA	NA	NA	KW-0732~Signal,	NA	NA	NA	DOMAIN:Wall-associated receptor kinase galacturonan-binding,
TKW	RFL_Contig840_961	yes	NA	TraesCS5A02G505300	probable protein phosphatase 2C 28(LOC123105866)	Triticum aestivum	NA	GO:0005783~endoplasmic reticulum,GO:0012505~endomembrane system,GO:0016020~membrane,	GO:0046872~metal ion binding,	IPR000222:Protein phosphatase 2C, manganese/magnesium aspartate binding site,IPR001932:Protein phosphatase 2C (PP2C)-like,	NA	NA	SM00332:PP2Cc,	NA	NA	NA	KW-0460~Magnesium,KW-0464~Manganese,KW-0479~Metal-binding,	KW-0378~Hydrolase,	NA	DOMAIN:PPM-type phosphatase,
TKW	RFL_Contig840_961	no	7928	TraesCS5A02G505400	protein CHAPERONE-LIKE PROTEIN OF POR1, chloroplastic-like(LOC123093684)	Triticum aestivum	NA	GO:0016021~integral component of membrane,	NA	IPR021788:Protein of unknown function DUF3353,	NA	NA	NA	NA	KW-0472~Membrane,	KW-0812~Transmembrane,KW-1133~Transmembrane helix,	NA	NA	NA	REGION:Disordered,TRANSMEM:Helical,
TKW	RFL_Contig840_961	no	122942	TraesCS5A02G505200	NA	NA	NA	NA	NA	NA	NA	NA	NA	NA	NA	NA	NA	NA	NA	NA
TKW	RAC875_c42206_305	no	131557	TraesCS1B02G193400	Photosystem I reaction center subunit IX(CFC21_006641)	Triticum aestivum	GO:0015979~photosynthesis,	GO:0009522~photosystem I,GO:0016021~integral component of membrane,	NA	IPR002615:Photosystem I PsaJ, reaction centre subunit IX,	NA	NA	NA	KW-0602~Photosynthesis,	KW-0472~Membrane,KW-0603~Photosystem I,	KW-0812~Transmembrane,	NA	NA	NA	TRANSMEM:Helical,
TKW	Kukri_c31121_1460	yes	NA	TraesCS2A02G514400	probable E3 ubiquitin-protein ligase HIP1(LOC123190785)	Triticum aestivum	GO:0044238~primary metabolic process,GO:0044260~cellular macromolecule metabolic process,	NA	GO:0061630~ubiquitin protein ligase activity,	IPR001841:Zinc finger, RING-type,IPR013083:Zinc finger, RING/FYVE/PHD-type,	NA	NA	SM00184:RING,	NA	NA	NA	KW-0479~Metal-binding,KW-0862~Zinc,	NA	NA	COMPBIAS:Polar residues,DOMAIN:RING-type,REGION:Disordered,
TKW	Kukri_c31121_1460	no	68446	TraesCS2A02G514300	ethylene-responsive transcription factor ERF008(LOC778419)	Triticum aestivum	NA	GO:0005634~nucleus,	GO:0003677~DNA binding,GO:0003700~transcription factor activity, sequence-specific DNA binding,	IPR001471:AP2/ERF domain,IPR016177:DNA-binding, integrase-type,	NA	NA	SM00380:AP2,	KW-0804~Transcription,KW-0805~Transcription regulation,	KW-0539~Nucleus,	NA	NA	KW-0238~DNA-binding,	NA	COMPBIAS:Basic and acidic residues,COMPBIAS:Polar residues,DOMAIN:AP2/ERF,REGION:Disordered,
TKW	BS00074911_51	yes	NA	TraesCS1B02G393400	uncharacterized LOC123143824(LOC123143824)	Triticum aestivum	GO:0044238~primary metabolic process,GO:0044260~cellular macromolecule metabolic process,	NA	GO:0061630~ubiquitin protein ligase activity,	IPR001841:Zinc finger, RING-type,IPR013083:Zinc finger, RING/FYVE/PHD-type,	NA	NA	SM00184:RING,	NA	NA	NA	KW-0479~Metal-binding,KW-0862~Zinc,	NA	NA	COMPBIAS:Basic and acidic residues,DOMAIN:RING-type,REGION:Disordered,
TKW	BS00074911_51	no	8187	TraesCS1B02G393500	Serine/threonine-protein phosphatase (A0A3B5Z341_WHEAT)	Triticum aestivum	NA	NA	NA	IPR004843:Metallophosphoesterase domain,IPR006186:Serine/threonine-specific protein phosphatase/bis(5-nucleosyl)-tetraphosphatase,	NA	NA	SM00156:PP2Ac,	NA	NA	NA	KW-0464~Manganese,KW-0479~Metal-binding,	KW-0378~Hydrolase,	NA	DOMAIN:Serine/threonine specific protein phosphatases,
TKW	BS00074911_51	no	21805	TraesCS1B02G393600	putative disease resistance protein RGA3(LOC123143845)	Triticum aestivum	GO:0006952~defense response,	NA	GO:0043531~ADP binding,	IPR002182:NB-ARC,IPR027417:P-loop containing nucleoside triphosphate hydrolase,	NA	NA	NA	KW-0611~Plant defense,	NA	NA	NA	NA	NA	DOMAIN:NB-ARC,
TKW	BS00074911_51	no	25389	TraesCS1B02G393700	reticulon-like protein B9(LOC123097635)	Triticum aestivum	GO:0009617~response to bacterium,	GO:0005789~endoplasmic reticulum membrane,GO:0016021~integral component of membrane,	NA	IPR003388:Reticulon,	NA	NA	NA	NA	KW-0472~Membrane,	NA	NA	NA	NA	COMPBIAS:Basic and acidic residues,DOMAIN:Reticulon,REGION:Disordered,TRANSMEM:Helical,
TKW	BS00074911_51	no	73514	TraesCS1B02G393300	phospholipase D alpha 1-like(LOC123143802)	Triticum aestivum	GO:0009395~phospholipid catabolic process,GO:0016042~lipid catabolic process,GO:0046470~phosphatidylcholine metabolic process,	GO:0005886~plasma membrane,GO:0016020~membrane,	GO:0004630~phospholipase D activity,GO:0005509~calcium ion binding,GO:0070290~N-acylphosphatidylethanolamine-specific phospholipase D activity,	IPR000008:C2 calcium-dependent membrane targeting,IPR001736:Phospholipase D/Transphosphatidylase,IPR011402:Phospholipase D, plant,IPR015679:Phospholipase D family,IPR024632:Phospholipase D, C-terminal,	taes00564:Glycerophospholipid metabolism,taes00565:Ether lipid metabolism,taes01100:Metabolic pathways,taes01110:Biosynthesis of secondary metabolites,taes04144:Endocytosis,	PIRSF036470:phospholipase D, plant type,	SM00155:PLDc,SM00239:C2,	KW-0442~Lipid degradation,KW-0443~Lipid metabolism,	NA	NA	KW-0106~Calcium,KW-0479~Metal-binding,	KW-0378~Hydrolase,	NA	DOMAIN:C2,DOMAIN:PLD phosphodiesterase,
TKW	BS00074911_51	no	123288	TraesCS1B02G393200	lipid phosphate phosphatase 2-like(LOC123143788)	Triticum aestivum	GO:0006644~phospholipid metabolic process,	GO:0016021~integral component of membrane,	GO:0042577~lipid phosphatase activity,	IPR000326:Phosphatidic acid phosphatase type 2/haloperoxidase,	taes00561:Glycerolipid metabolism,taes00564:Glycerophospholipid metabolism,taes01110:Biosynthesis of secondary metabolites,	NA	SM00014:acidPPc,	NA	KW-0472~Membrane,	KW-0812~Transmembrane,KW-1133~Transmembrane helix,	NA	NA	NA	COMPBIAS:Polar residues,COMPBIAS:Pro residues,DOMAIN:Phosphatidic acid phosphatase type 2/haloperoxidase,REGION:Disordered,TRANSMEM:Helical,
TKW	BS00074911_51	no	123736	TraesCS1B02G393800	MATH domain-containing protein(CFC21_008660)	Triticum aestivum	GO:0016567~protein ubiquitination,	NA	NA	IPR002083:MATH,IPR008974:TRAF-like,	NA	NA	NA	NA	NA	NA	NA	NA	NA	DOMAIN:MATH,REGION:Disordered,
TKW	BS00074911_51	no	128543	TraesCS1B02G393100	homeobox-leucine zipper protein HOX7-like(LOC123097617)	Triticum aestivum	NA	GO:0005634~nucleus,	GO:0000981~RNA polymerase II transcription factor activity, sequence-specific DNA binding,GO:0043565~sequence-specific DNA binding,	IPR001356:Homeodomain,IPR003106:Leucine zipper, homeobox-associated,IPR009057:Homeodomain-like,IPR017970:Homeobox, conserved site,	NA	NA	SM00340:HALZ,SM00389:HOX,	NA	NA	KW-0175~Coiled coil,	NA	NA	NA	COMPBIAS:Basic and acidic residues,DNA_BIND:Homeobox,DOMAIN:Homeobox,REGION:Disordered,
TKW	BS00074911_51	no	135090	TraesCS1B02G393000	putative disease resistance RPP13-like protein 1(LOC123143740)	Triticum aestivum	GO:0006952~defense response,	NA	GO:0005524~ATP binding,GO:0043531~ADP binding,	IPR002182:NB-ARC,IPR027417:P-loop containing nucleoside triphosphate hydrolase,	NA	NA	NA	KW-0611~Plant defense,	NA	NA	NA	NA	NA	DOMAIN:NB-ARC,DOMAIN:Rx N-terminal,
TKW	BS00074911_51	no	143397	TraesCS1B02G392900	ankyrin repeat-containing protein NPR4-like(LOC123143746)	Triticum aestivum	NA	GO:0016020~membrane,GO:0016021~integral component of membrane,	NA	IPR002110:Ankyrin repeat,IPR026961:PGG domain,	NA	NA	SM00248:ANK,	NA	KW-0472~Membrane,	KW-0677~Repeat,KW-0812~Transmembrane,KW-1133~Transmembrane helix,	NA	NA	NA	DOMAIN:PGG,REPEAT:ANK,TRANSMEM:Helical,
TKW	BobWhite_c40479_283	no	5793	TraesCS7D02G095800	alpha-1,2-galactosyltransferase gmh3-like(LOC123165909)	Triticum aestivum	GO:0006487~protein N-linked glycosylation,	GO:0000139~Golgi membrane,GO:0016021~integral component of membrane,	GO:0016757~transferase activity, transferring glycosyl groups,	IPR008630:Galactosyl transferase,	taes00513:Various types of N-glycan biosynthesis,taes01100:Metabolic pathways,	NA	NA	NA	NA	KW-0732~Signal,KW-0735~Signal-anchor,KW-0812~Transmembrane,	NA	KW-0808~Transferase,	NA	NA
TKW	BobWhite_c40479_283	no	105979	TraesCS7D02G095700	cytochrome P450 76M5-like(LOC123168936)	Triticum aestivum	NA	GO:0016021~integral component of membrane,	GO:0004497~monooxygenase activity,GO:0005506~iron ion binding,GO:0016705~oxidoreductase activity, acting on paired donors, with incorporation or reduction of molecular oxygen,GO:0020037~heme binding,	IPR001128:Cytochrome P450,IPR002401:Cytochrome P450, E-class, group I,IPR017972:Cytochrome P450, conserved site,	NA	NA	NA	NA	KW-0472~Membrane,	KW-0812~Transmembrane,KW-1133~Transmembrane helix,	KW-0349~Heme,KW-0408~Iron,KW-0479~Metal-binding,	KW-0503~Monooxygenase,KW-0560~Oxidoreductase,	NA	NA
TKW	BobWhite_c40479_283	no	126760	TraesCS7D02G095500	cytochrome P450 76M5-like(LOC123169810)	Triticum aestivum	NA	GO:0016021~integral component of membrane,	GO:0004497~monooxygenase activity,GO:0005506~iron ion binding,GO:0016705~oxidoreductase activity, acting on paired donors, with incorporation or reduction of molecular oxygen,GO:0020037~heme binding,	IPR001128:Cytochrome P450,IPR002401:Cytochrome P450, E-class, group I,IPR017972:Cytochrome P450, conserved site,	NA	NA	NA	NA	KW-0472~Membrane,	KW-0732~Signal,KW-0812~Transmembrane,KW-1133~Transmembrane helix,	KW-0349~Heme,KW-0408~Iron,KW-0479~Metal-binding,	KW-0503~Monooxygenase,KW-0560~Oxidoreductase,	NA	NA
TKW	BobWhite_c40479_283	no	128087	TraesCS7D02G095400	uncharacterized LOC123049314(LOC123049314)	Triticum aestivum	NA	GO:0016021~integral component of membrane,	GO:0008270~zinc ion binding,	IPR010666:Zinc finger, GRF-type,	NA	NA	NA	NA	KW-0472~Membrane,	KW-0812~Transmembrane,KW-1133~Transmembrane helix,	KW-0479~Metal-binding,KW-0862~Zinc,	NA	NA	DOMAIN:GRF-type,TRANSMEM:Helical,
TKW	AX-94858447	yes	NA	TraesCS4A02G449800	uncharacterized LOC123083399(LOC123083399)	Triticum aestivum	NA	GO:0016020~membrane,GO:0016021~integral component of membrane,	NA	IPR026961:PGG domain,	NA	NA	NA	NA	KW-0472~Membrane,	KW-0677~Repeat,KW-0812~Transmembrane,KW-1133~Transmembrane helix,	NA	NA	NA	COMPBIAS:Basic and acidic residues,COMPBIAS:Polar residues,DOMAIN:PGG,REGION:Disordered,TRANSMEM:Helical,
TKW	AX-94858447	no	9258	TraesCS4A02G449900	uncharacterized LOC123088371(LOC123088371)	Triticum aestivum	NA	GO:0016020~membrane,GO:0016021~integral component of membrane,	NA	IPR026961:PGG domain,	NA	NA	NA	NA	KW-0472~Membrane,	KW-0677~Repeat,KW-0812~Transmembrane,KW-1133~Transmembrane helix,	NA	NA	NA	COMPBIAS:Polar residues,DOMAIN:PGG,REGION:Disordered,TRANSMEM:Helical,
TKW	AX-94858447	no	31229	TraesCS4A02G449700	Protein kinase domain-containing protein(CFC21_055349)	Triticum aestivum	NA	GO:0005886~plasma membrane,GO:0016021~integral component of membrane,	GO:0004674~protein serine/threonine kinase activity,GO:0004712~protein serine/threonine/tyrosine kinase activity,GO:0005524~ATP binding,	IPR000719:Protein kinase, catalytic domain,IPR008271:Serine/threonine-protein kinase, active site,IPR011009:Protein kinase-like domain,IPR017441:Protein kinase, ATP binding site,IPR021720:Malectin,	NA	NA	SM00220:S_TKc,	NA	KW-0472~Membrane,	KW-0812~Transmembrane,	NA	KW-0418~Kinase,KW-0808~Transferase,	NA	COMPBIAS:Polar residues,DOMAIN:Protein kinase,REGION:Disordered,TRANSMEM:Helical,
TKW	AX-94858447	no	59156	TraesCS4A02G450000	PGG domain-containing protein (A0A3B6I5I3_WHEAT)	Triticum aestivum	NA	GO:0016020~membrane,GO:0016021~integral component of membrane,	NA	IPR026961:PGG domain,	NA	NA	NA	NA	KW-0472~Membrane,	KW-0677~Repeat,KW-0812~Transmembrane,KW-1133~Transmembrane helix,	NA	NA	NA	COMPBIAS:Basic and acidic residues,COMPBIAS:Polar residues,DOMAIN:PGG,REGION:Disordered,TRANSMEM:Helical,
TKW	AX-94858447	no	66374	TraesCS4A02G450100	uncharacterized LOC123088372(LOC123088372)	Triticum aestivum	NA	GO:0016020~membrane,GO:0016021~integral component of membrane,	NA	IPR026961:PGG domain,	NA	NA	NA	NA	KW-0472~Membrane,	KW-0677~Repeat,KW-0812~Transmembrane,KW-1133~Transmembrane helix,	NA	NA	NA	COMPBIAS:Basic and acidic residues,COMPBIAS:Polar residues,DOMAIN:PGG,REGION:Disordered,TRANSMEM:Helical,
TKW	AX-94858447	no	74645	TraesCS4A02G450200	uncharacterized LOC123084413(LOC123084413)	Triticum aestivum	NA	GO:0016020~membrane,GO:0016021~integral component of membrane,	NA	IPR026961:PGG domain,	NA	NA	NA	NA	KW-0472~Membrane,	KW-0677~Repeat,KW-0812~Transmembrane,KW-1133~Transmembrane helix,	NA	NA	NA	COMPBIAS:Basic and acidic residues,DOMAIN:PGG,REGION:Disordered,TRANSMEM:Helical,
TKW	AX-94858447	no	106731	TraesCS4A02G449600	patatin-like protein 2(LOC123083398)	Triticum aestivum	GO:0016042~lipid catabolic process,	NA	GO:0004620~phospholipase activity,GO:0047372~acylglycerol lipase activity,	IPR002641:Patatin/Phospholipase A2-related,IPR016035:Acyl transferase/acyl hydrolase/lysophospholipase,	NA	NA	NA	NA	NA	NA	NA	NA	NA	ACT_SITE:Nucleophile,ACT_SITE:Proton acceptor,DOMAIN:PNPLA,MOTIF:DGA/G,MOTIF:GXGXXG,MOTIF:GXSXG,REGION:Disordered,
TKW	AX-94858447	no	136005	TraesCS4A02G450300	Malectin domain-containing protein(CFC21_055355)	Triticum aestivum	NA	GO:0005886~plasma membrane,	GO:0004674~protein serine/threonine kinase activity,GO:0004712~protein serine/threonine/tyrosine kinase activity,	IPR021720:Malectin,	NA	NA	NA	NA	NA	KW-0732~Signal,	NA	NA	NA	DOMAIN:Malectin,
TKW	AX-94858447	no	147488	TraesCS4A02G449500	uncharacterized LOC123084411(LOC123084411)	Triticum aestivum	GO:0043086~negative regulation of catalytic activity,	NA	GO:0004857~enzyme inhibitor activity,	IPR006501:Pectinesterase inhibitor,	NA	NA	NA	NA	NA	KW-0732~Signal,	NA	NA	NA	DOMAIN:Pectinesterase inhibitor,
TKW	AX-86185201	NA	NA	NA	NA	NA	NA	NA	NA	NA	NA	NA	NA	NA	NA	NA	NA	NA	NA	NA
TKW	AX-158556233	no	617	TraesCS7A02G479000	cyclin-D5-3-like(LOC123154782)	Triticum aestivum	NA	NA	NA	NA	NA	NA	NA	NA	NA	NA	NA	NA	NA	REGION:Disordered,
TKW	AX-158556233	no	69718	TraesCS7A02G479100	protein RGF1 INDUCIBLE TRANSCRIPTION FACTOR 1-like(LOC123149210)	Triticum aestivum	GO:0006399~tRNA metabolic process,	GO:0005737~cytoplasm,	GO:0008270~zinc ion binding,GO:0051500~D-tyrosyl-tRNA(Tyr) deacylase activity,	IPR000315:Zinc finger, B-box,IPR006734:Protein of unknown function DUF597,	NA	NA	NA	NA	NA	KW-0863~Zinc-finger,	KW-0479~Metal-binding,KW-0862~Zinc,	NA	NA	DOMAIN:B box-type,
TKW	AX-158556233	no	147265	TraesCS7A02G479200	thioredoxin O, mitochondrial-like(LOC123149213)	Triticum aestivum	NA	NA	NA	IPR013766:Thioredoxin domain,	NA	NA	NA	NA	NA	NA	NA	NA	NA	COMPBIAS:Pro residues,DOMAIN:Thioredoxin,REGION:Disordered,
